# Supplementary material for: When Storms Stir the Mediterranean Depths: Chlorophyll-a Response to Mediterranean Hurricanes
Source: Copernicus journal article supplement (doi:10.5194/egusphere-2025-3260), 2025-07-18

# ZEO – December 2005

Zeo Cyclone Track with Wind Influence Areas

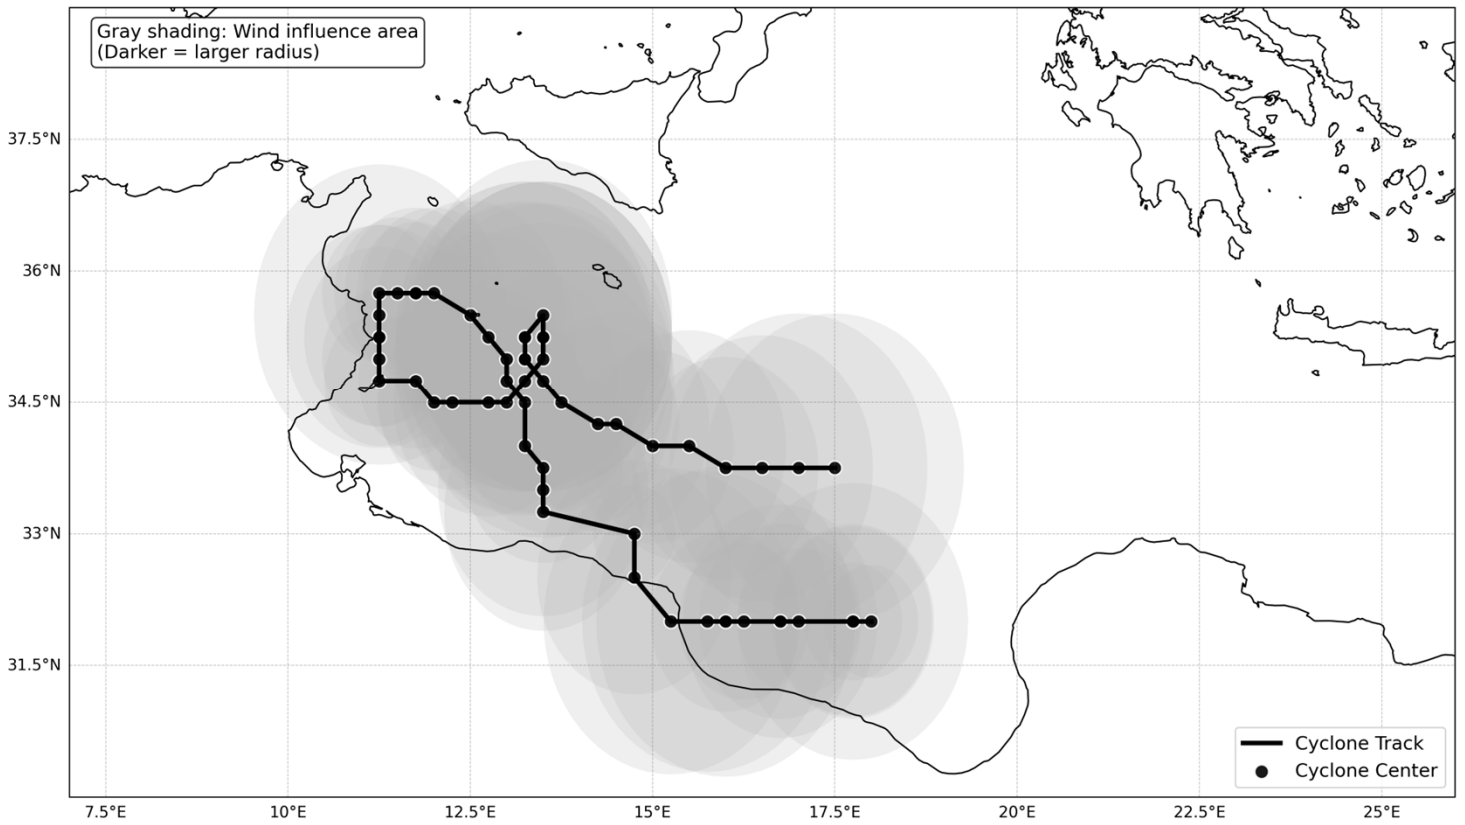

Cyclone Center Pressure and Movement

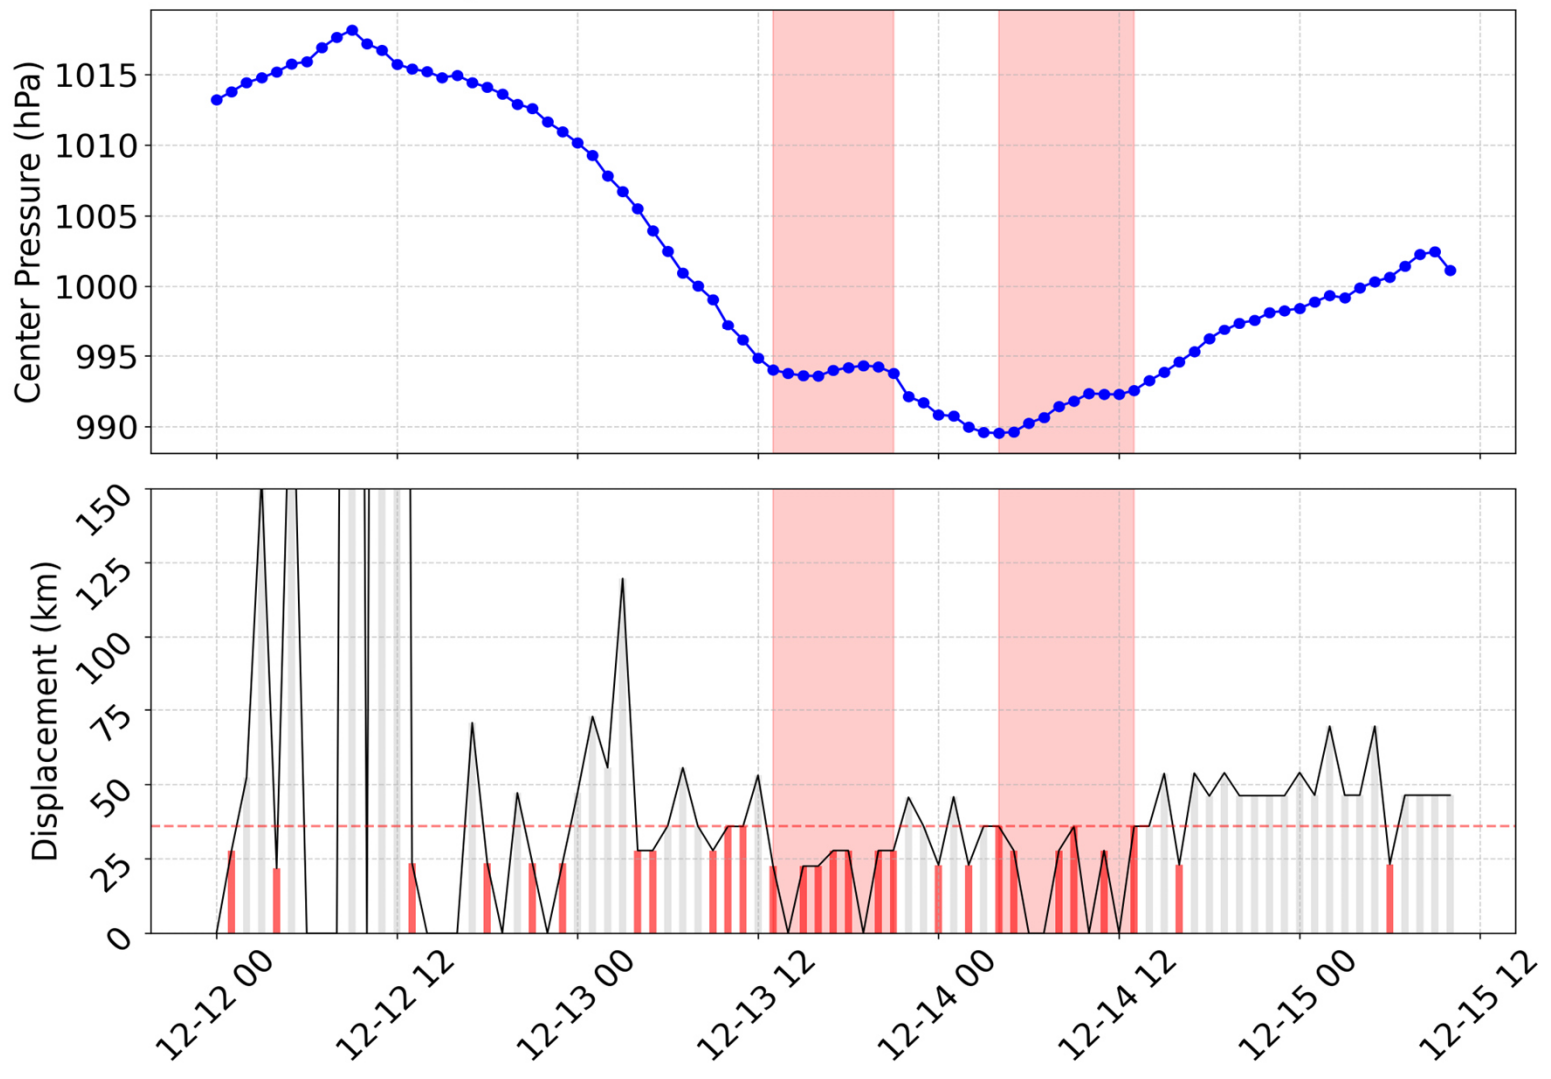

# JANET – October 2007

Janet Cyclone Track with Wind Influence Areas

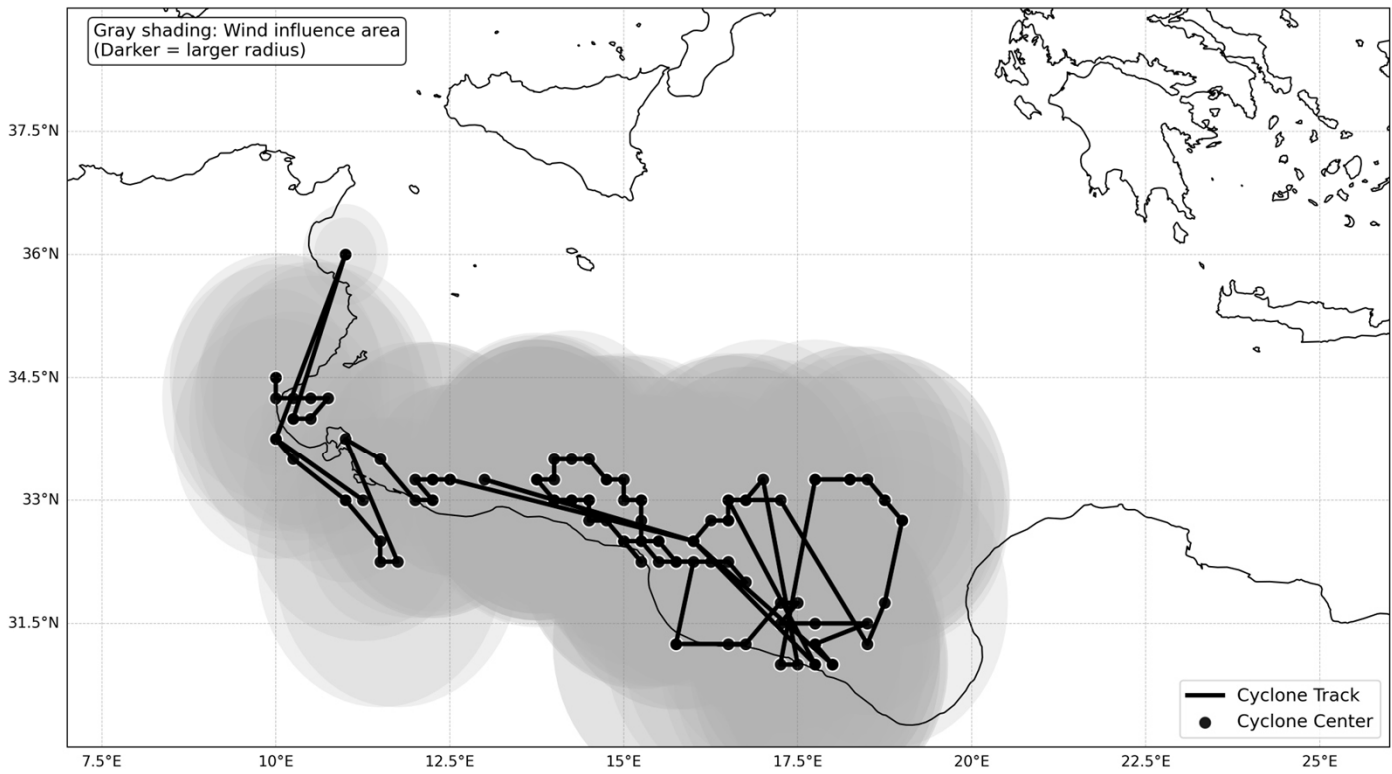

## Cyclone Center Pressure and Movement

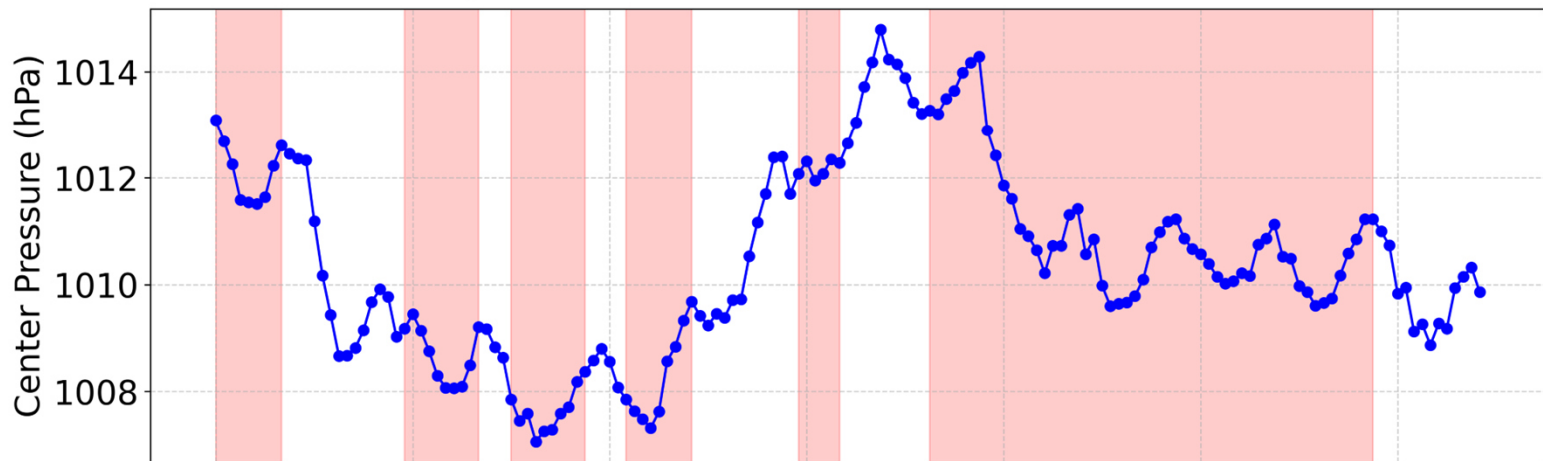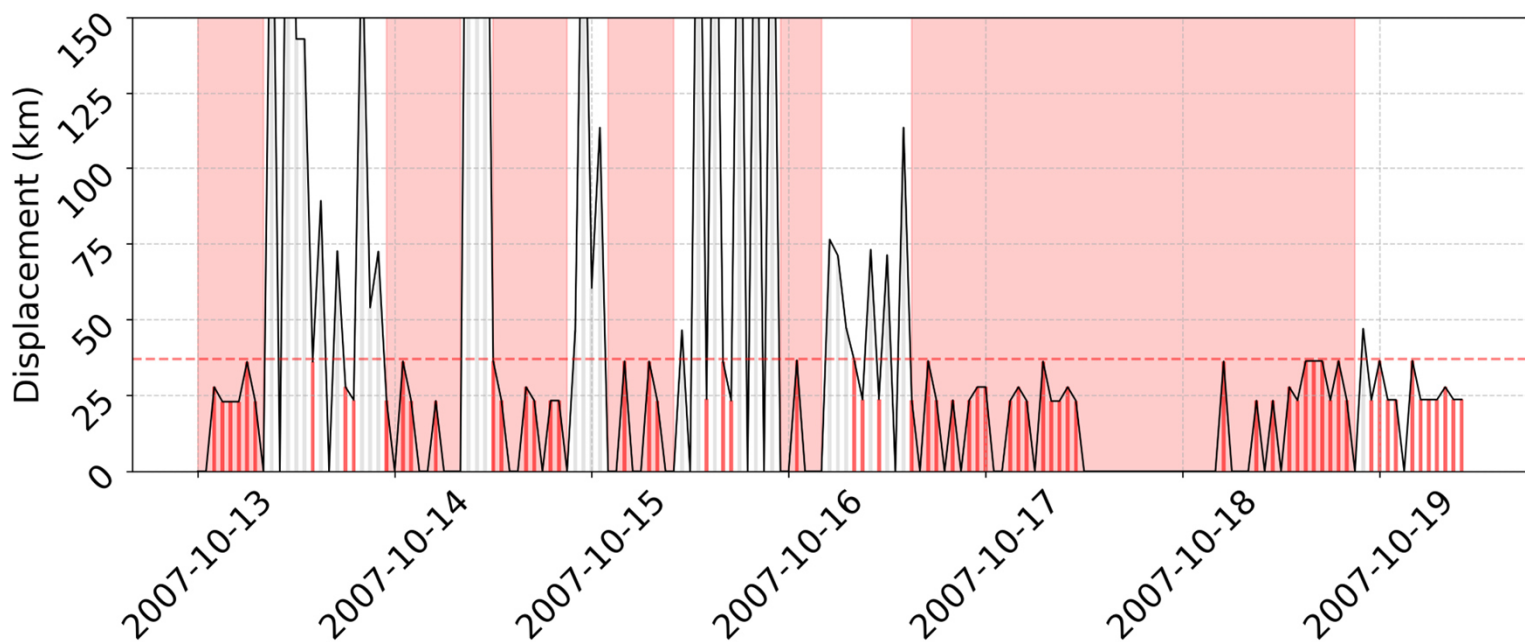

# ROLF – November 2011

Rolf Cyclone Track with Wind Influence Areas

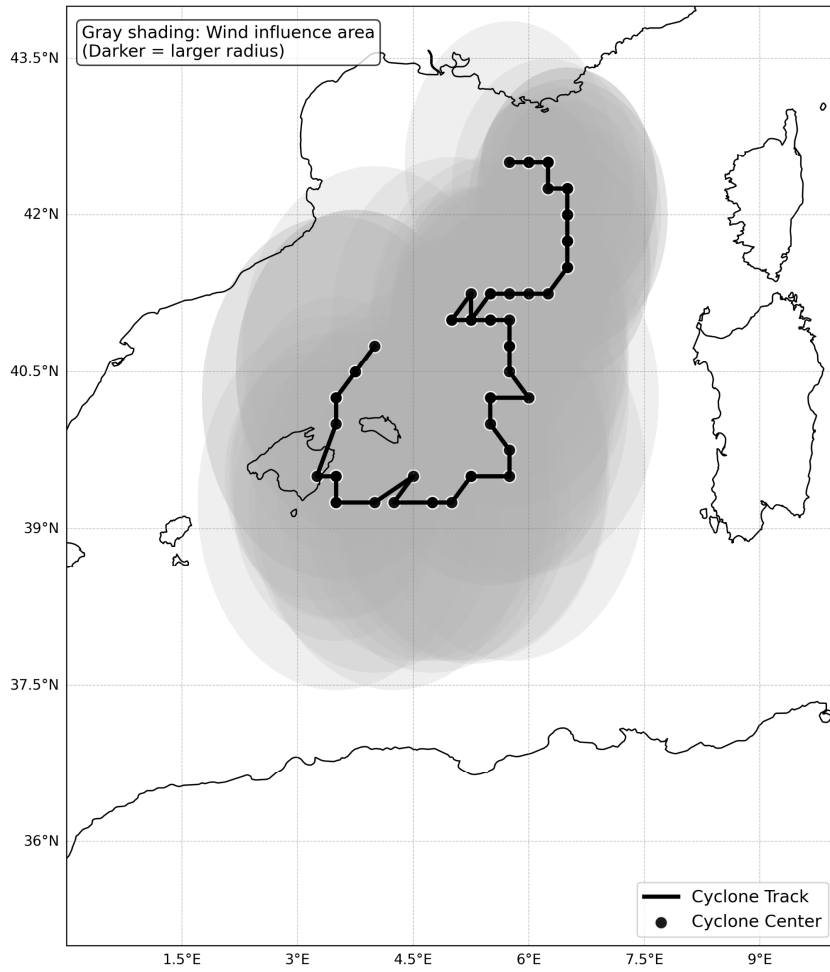

Cyclone Center Pressure and Movement

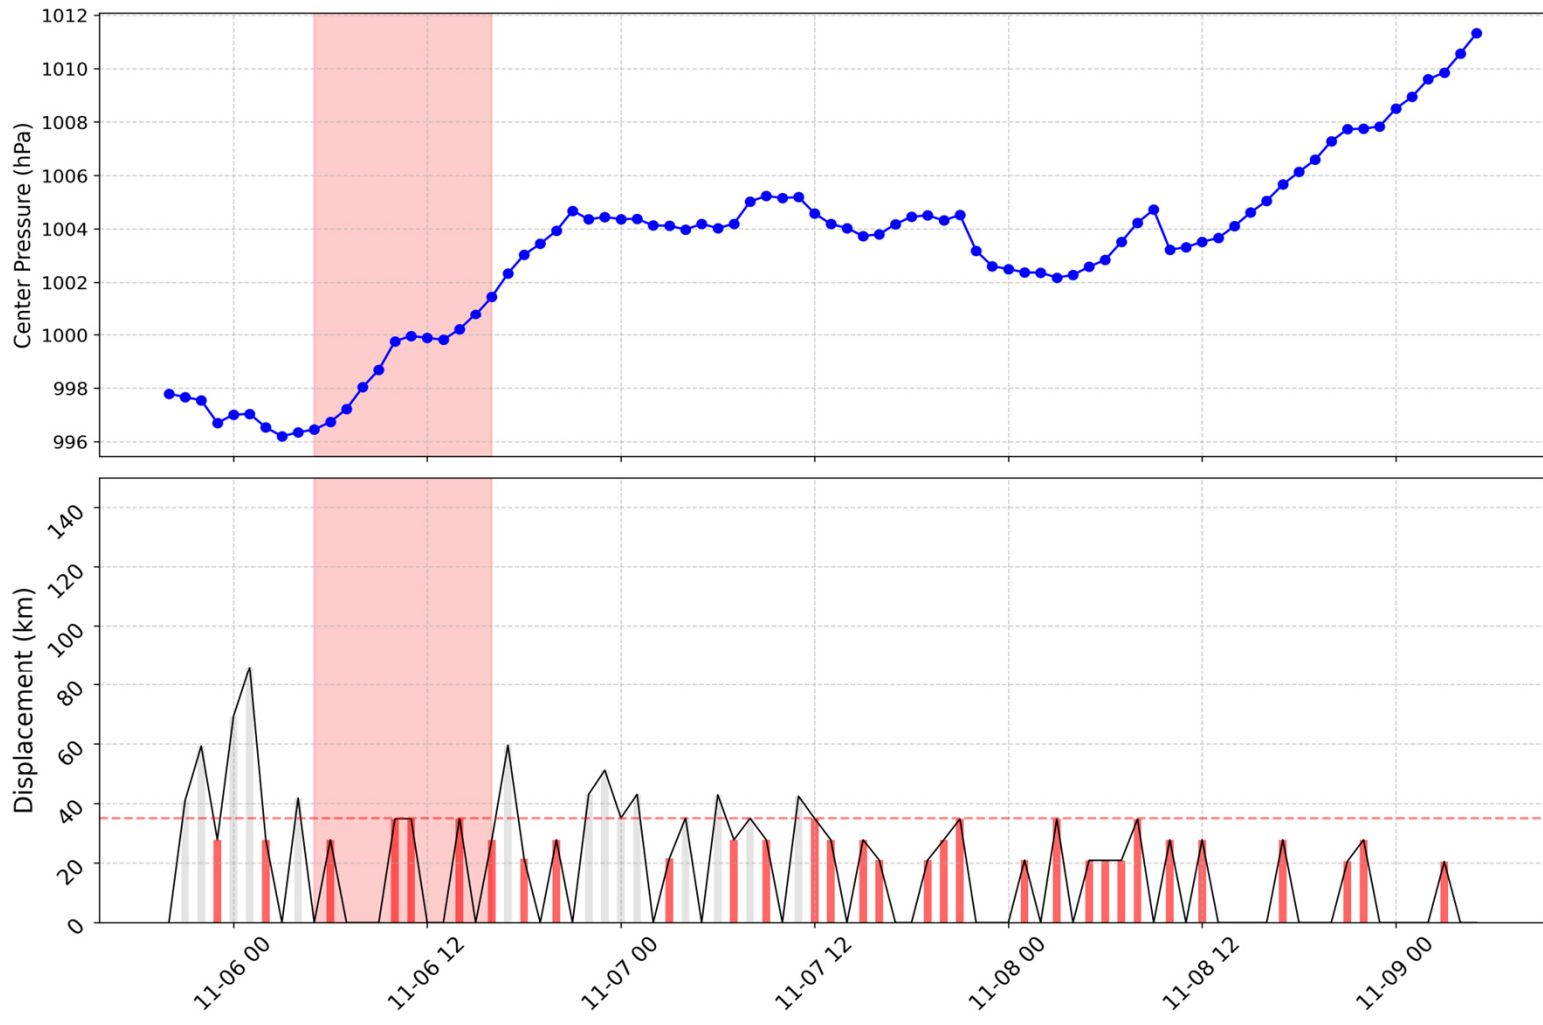

# AKLE – January 2011

Akle Cyclone Track with Wind Influence Areas

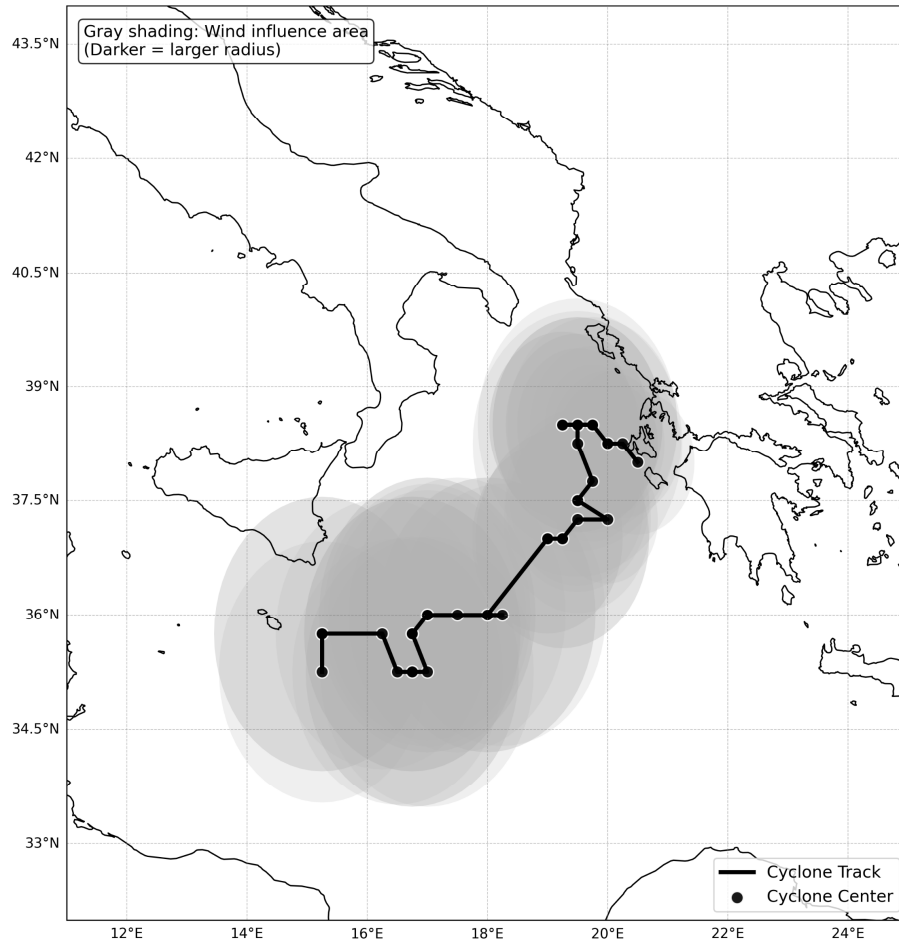

Cyclone Center Pressure and Movement

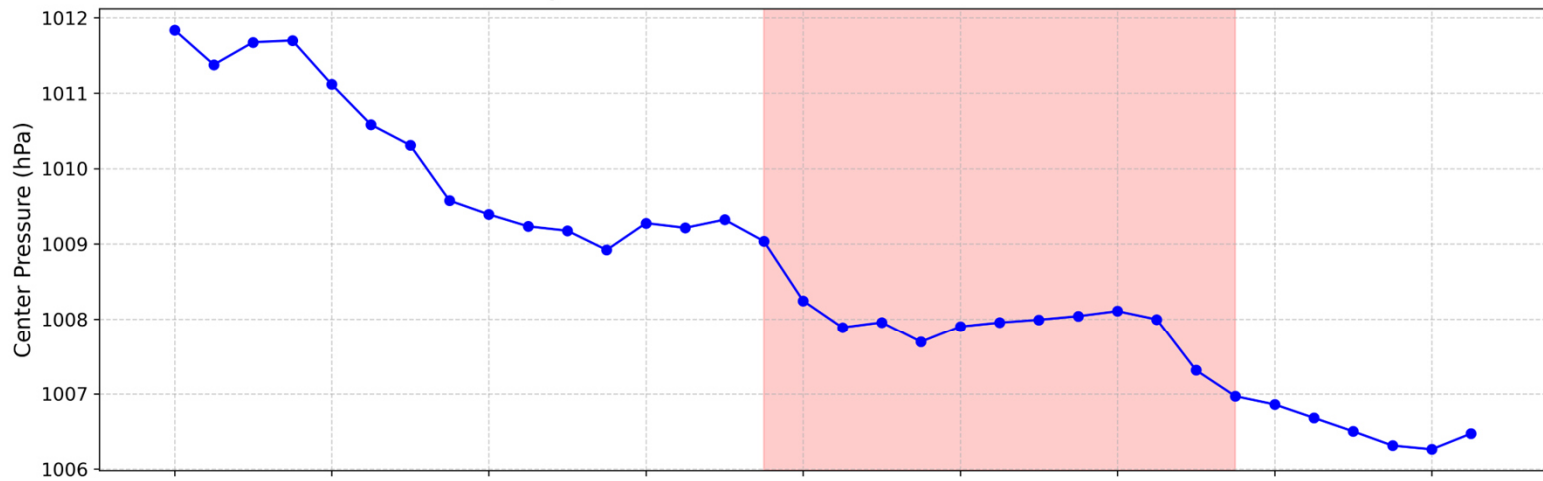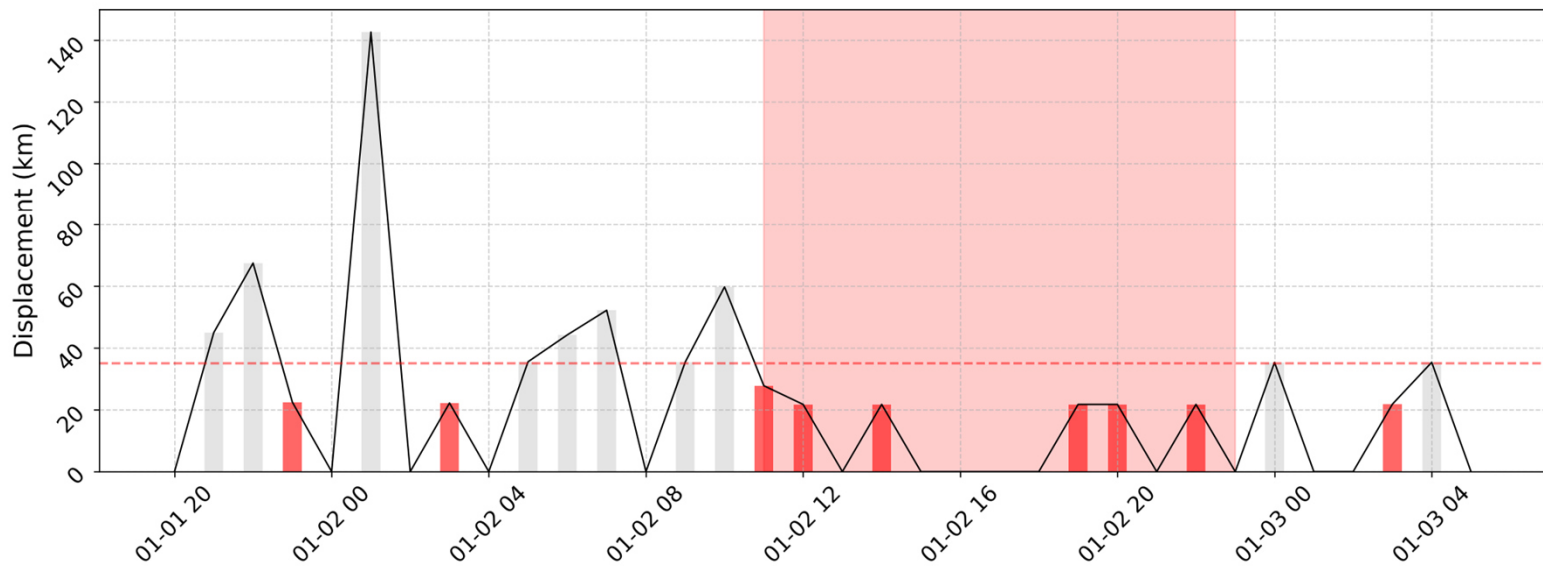



# QENDRESA – November 2014

Qendresa Cyclone Track with Wind Influence Areas

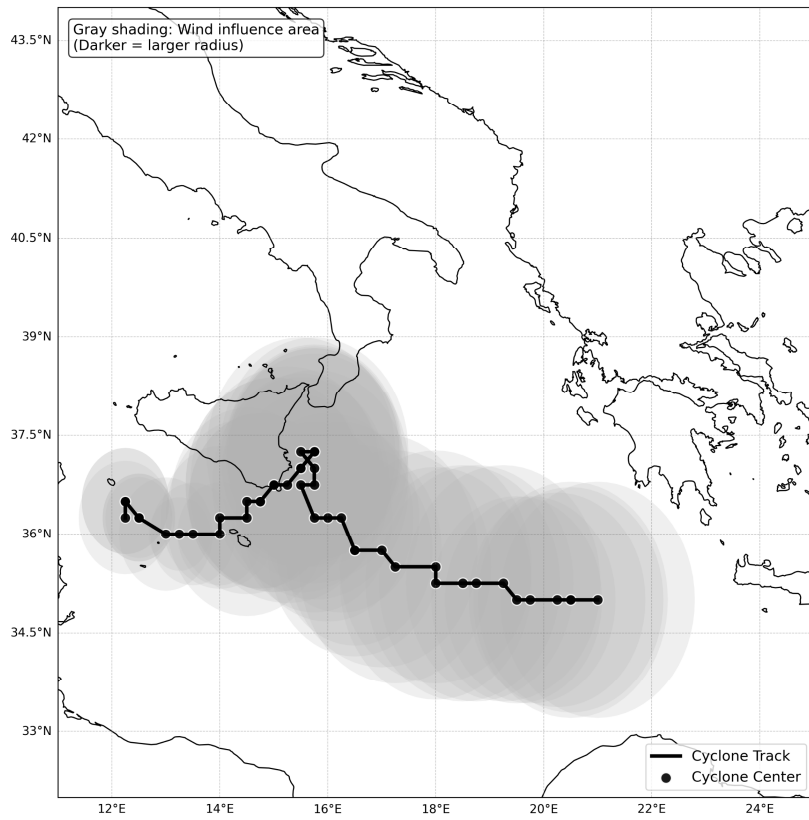

Cyclone Center Pressure and Movement

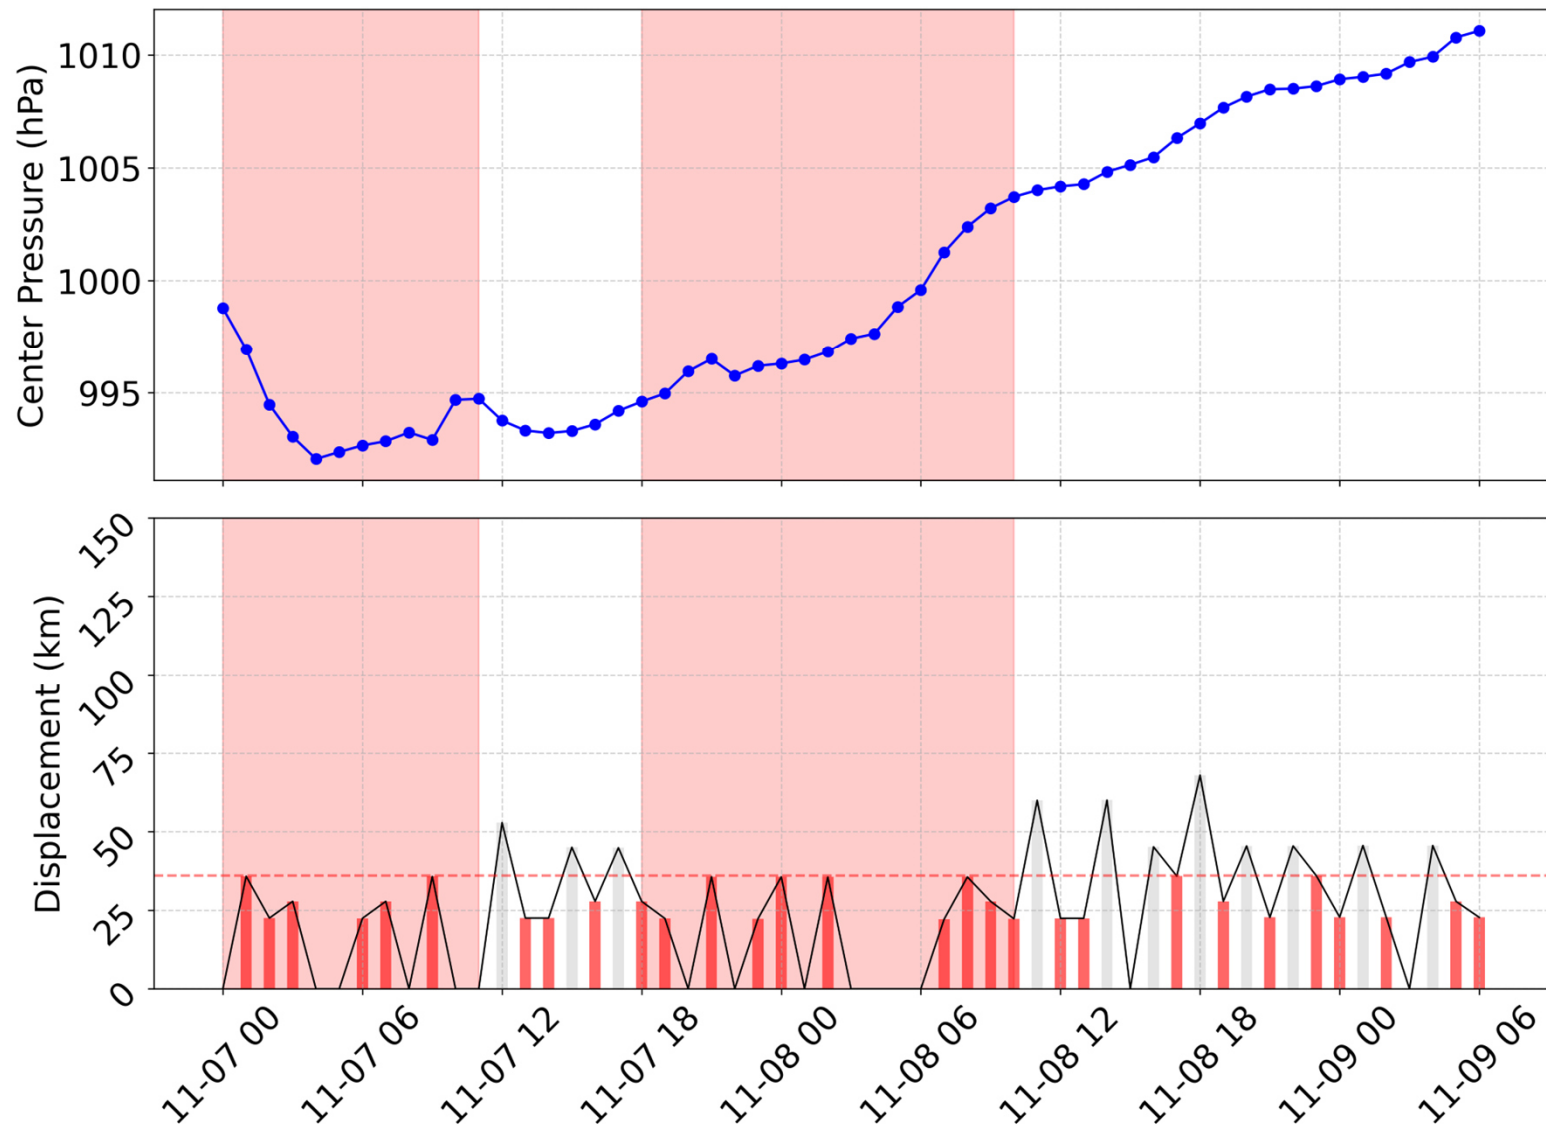

# XANDRA – December 2014

Xandra Cyclone Track with Wind Influence Areas

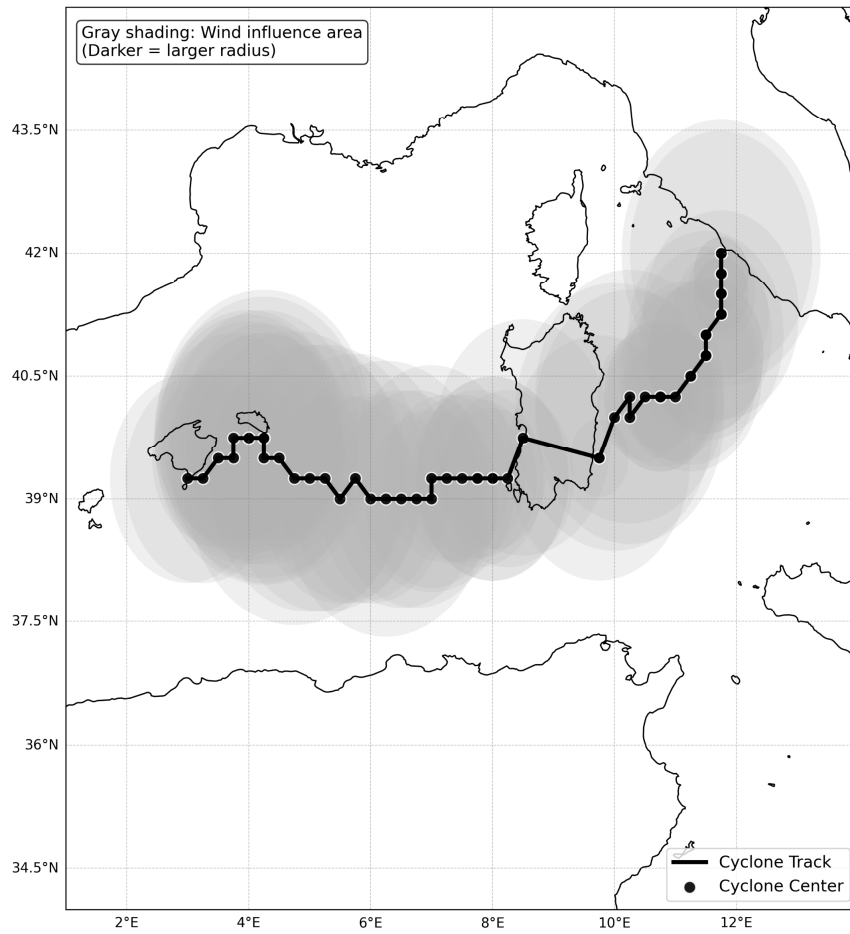

Cyclone Center Pressure and Movement

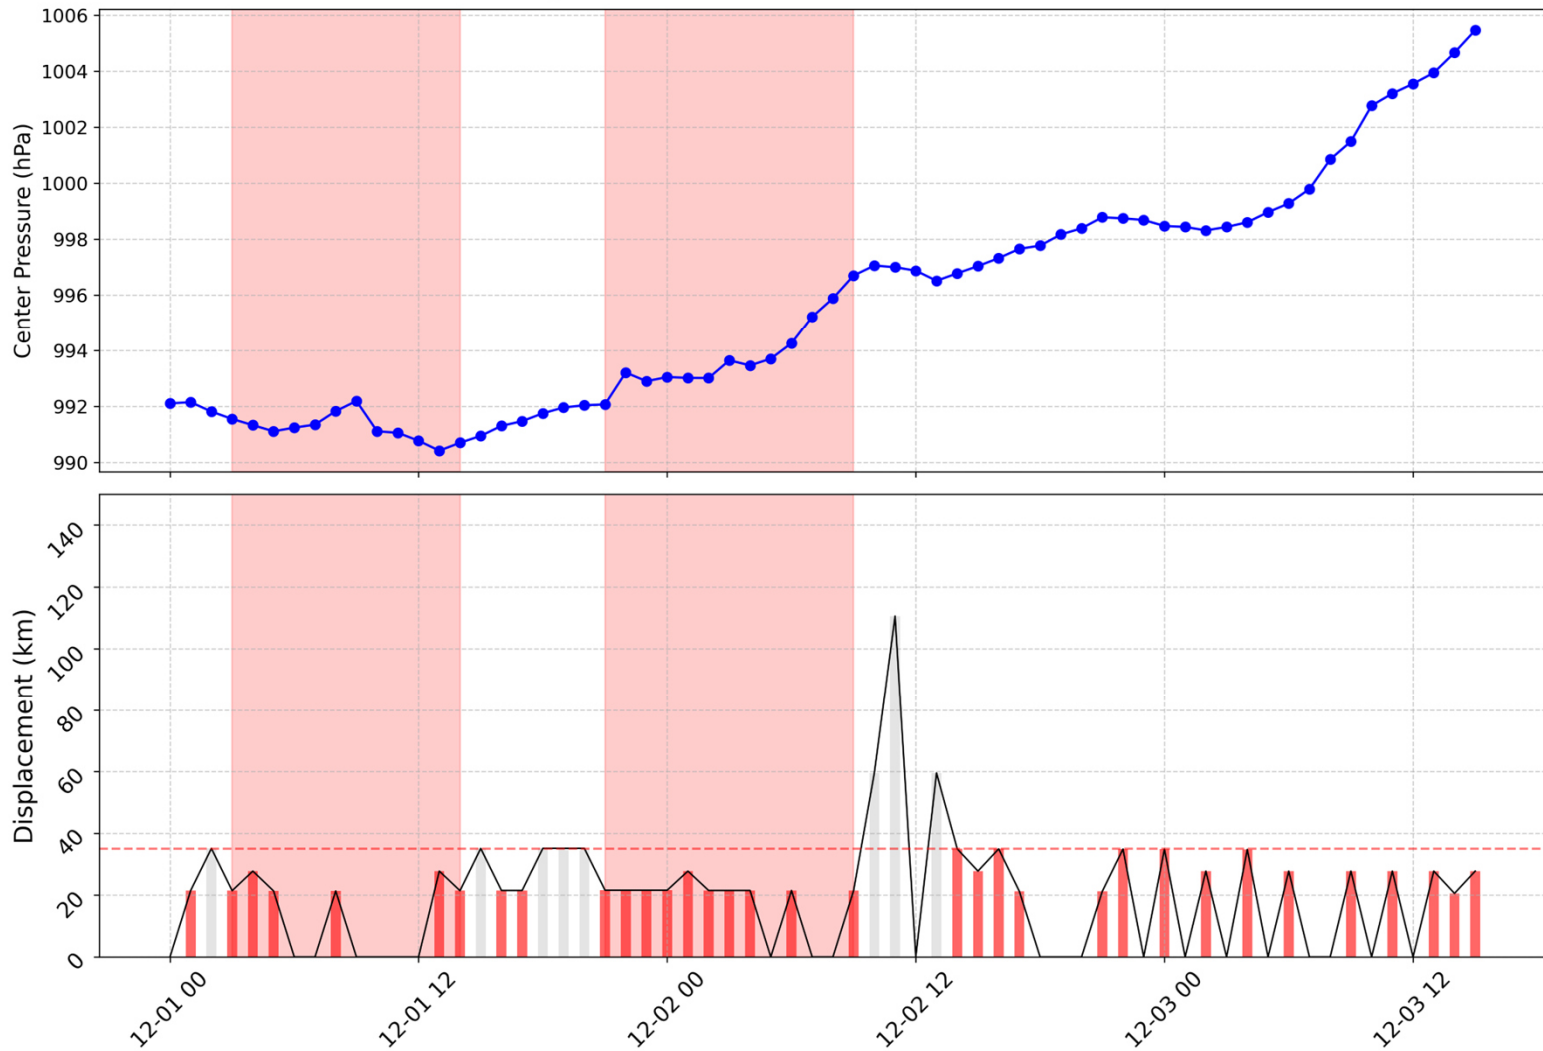

# ERIK – May 2015

Erik Cyclone Track with Wind Influence Areas

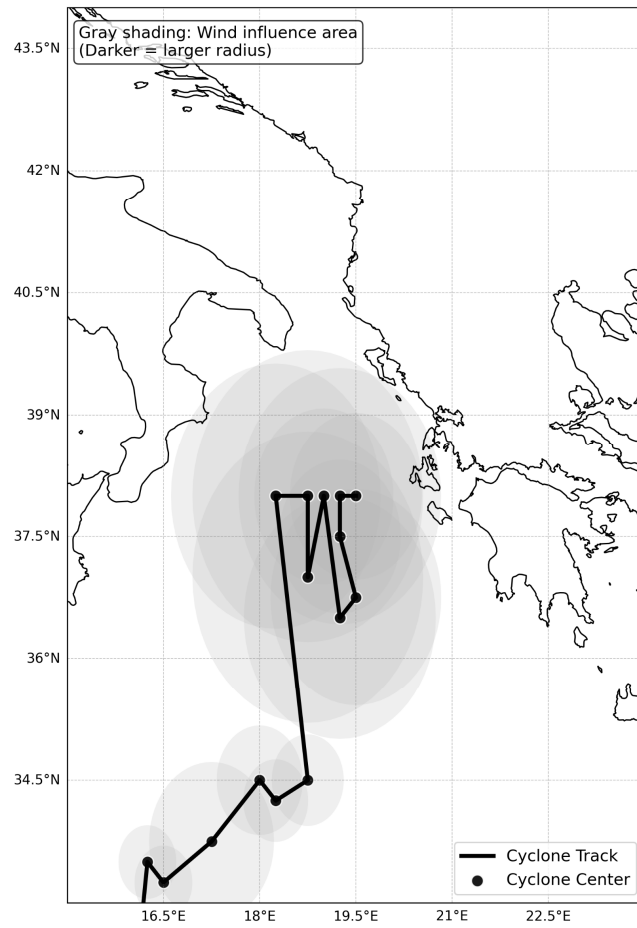

Cyclone Center Pressure and Movement

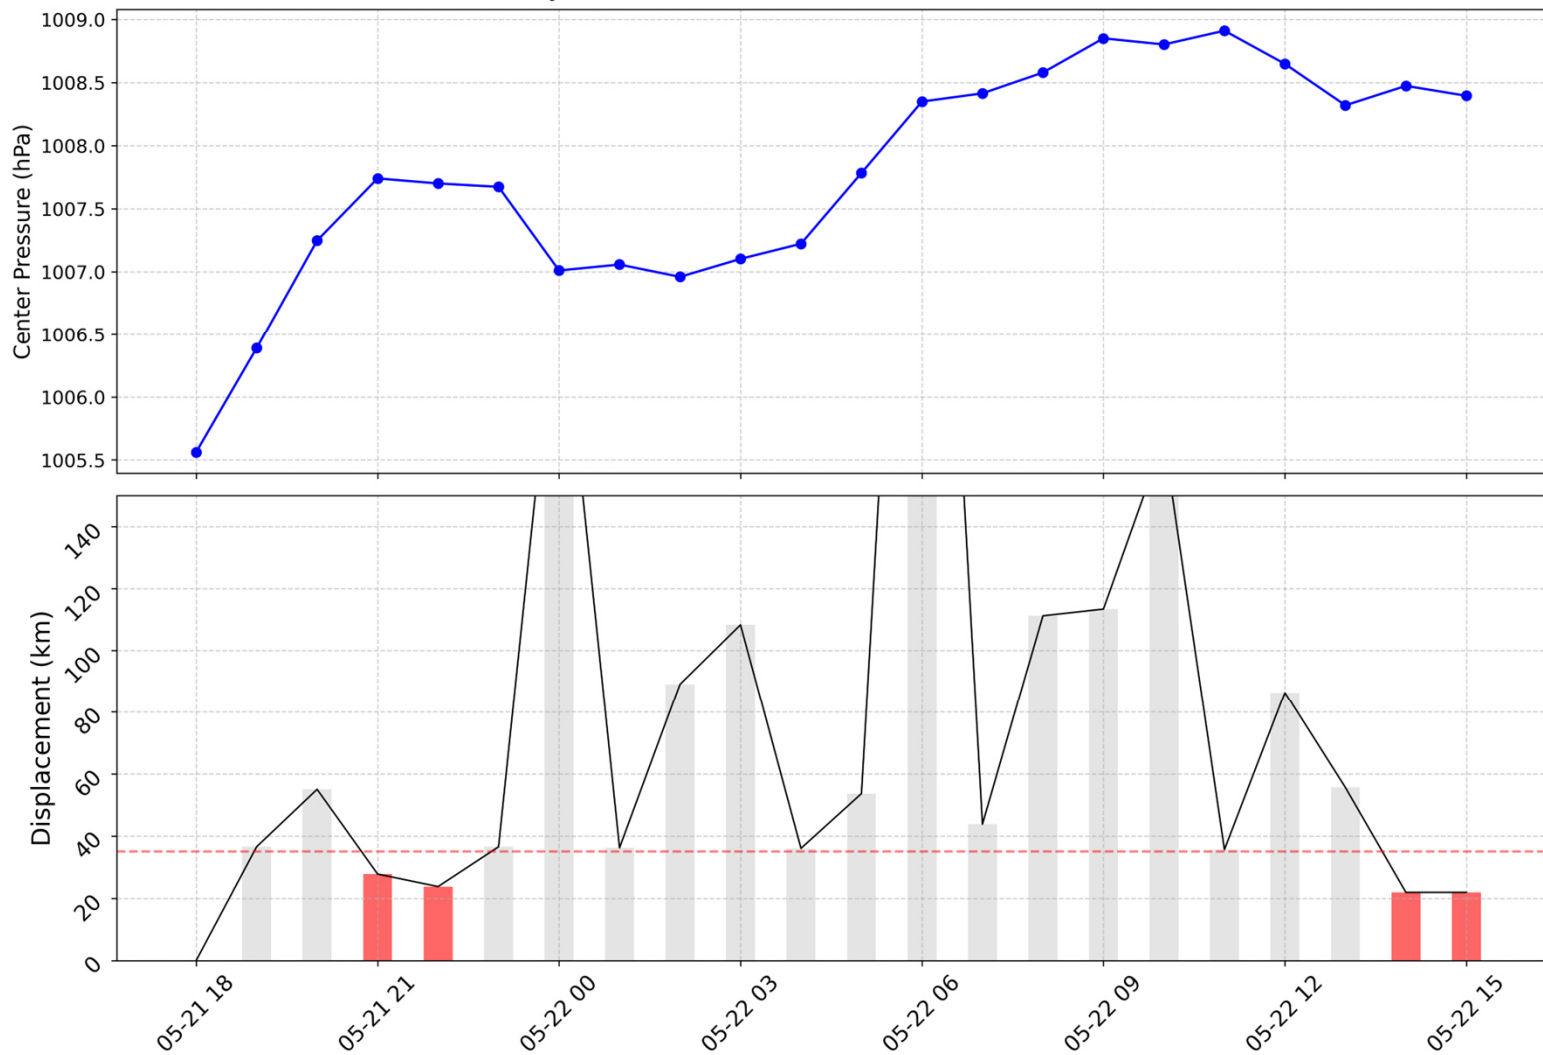

# CAULONIA – March 2016

Caulonia Cyclone Track with Wind Influence Areas

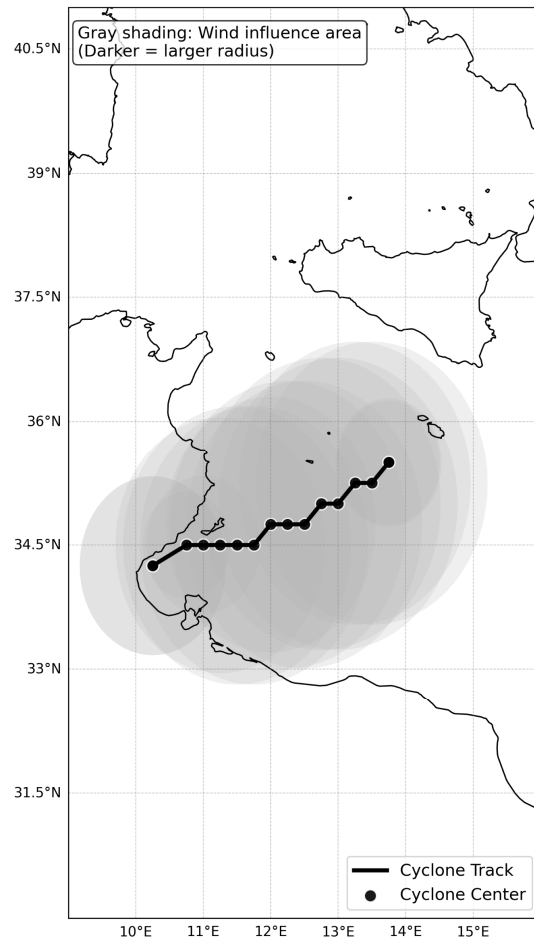

Cyclone Center Pressure and Movement

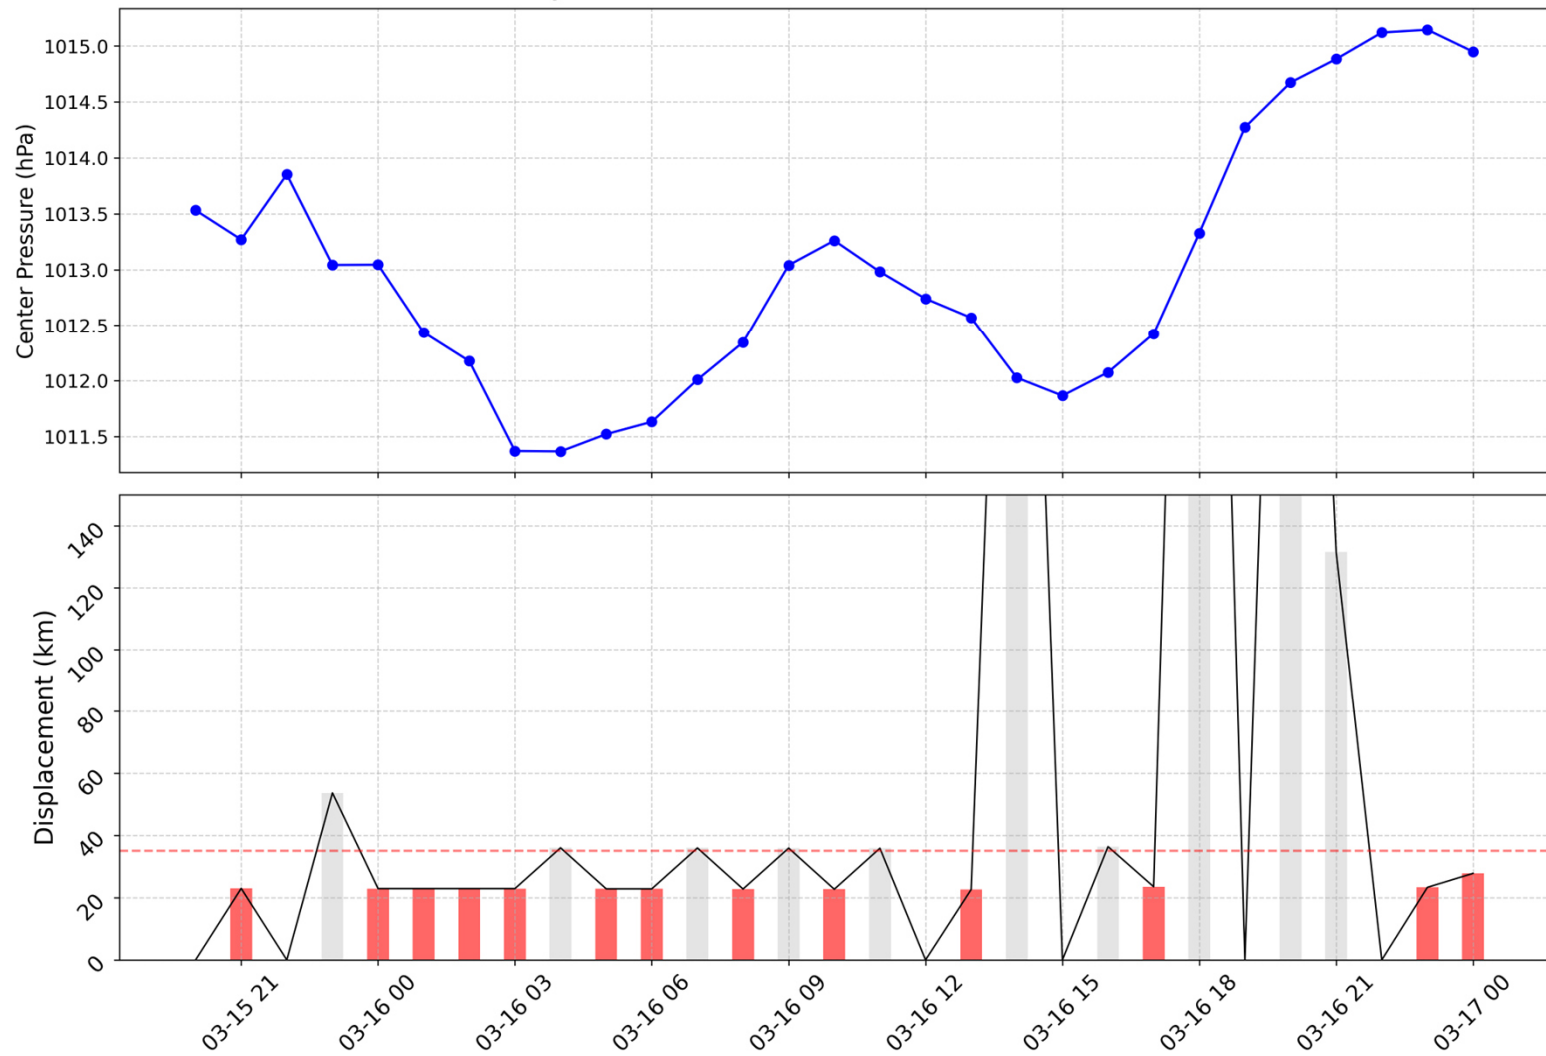



# TRIXIE – October 2016

Trixie Cyclone Track with Wind Influence Areas

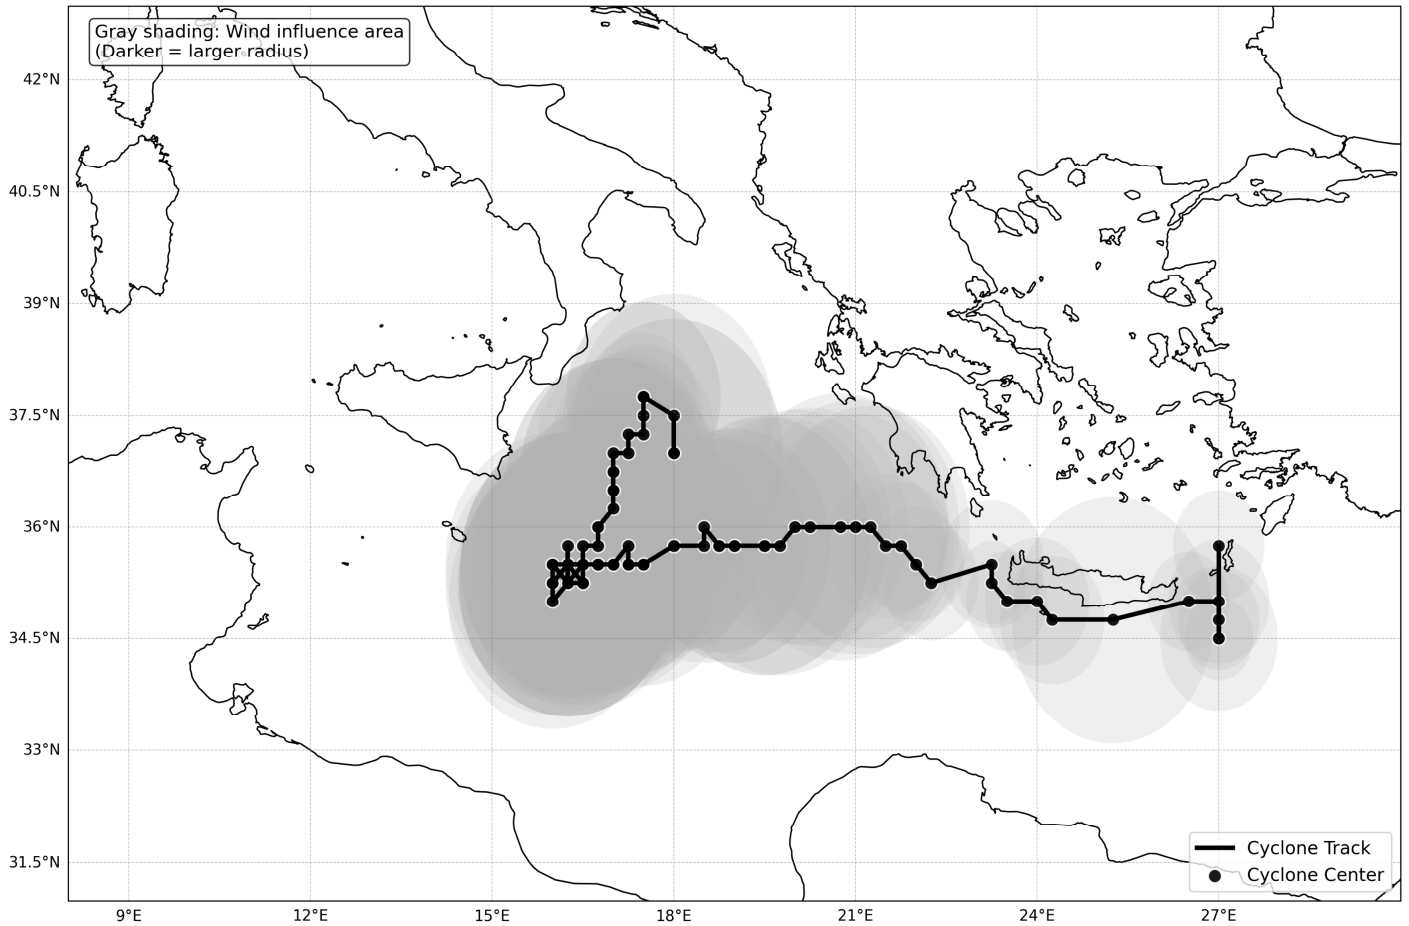

Cyclone Center Pressure and Movement

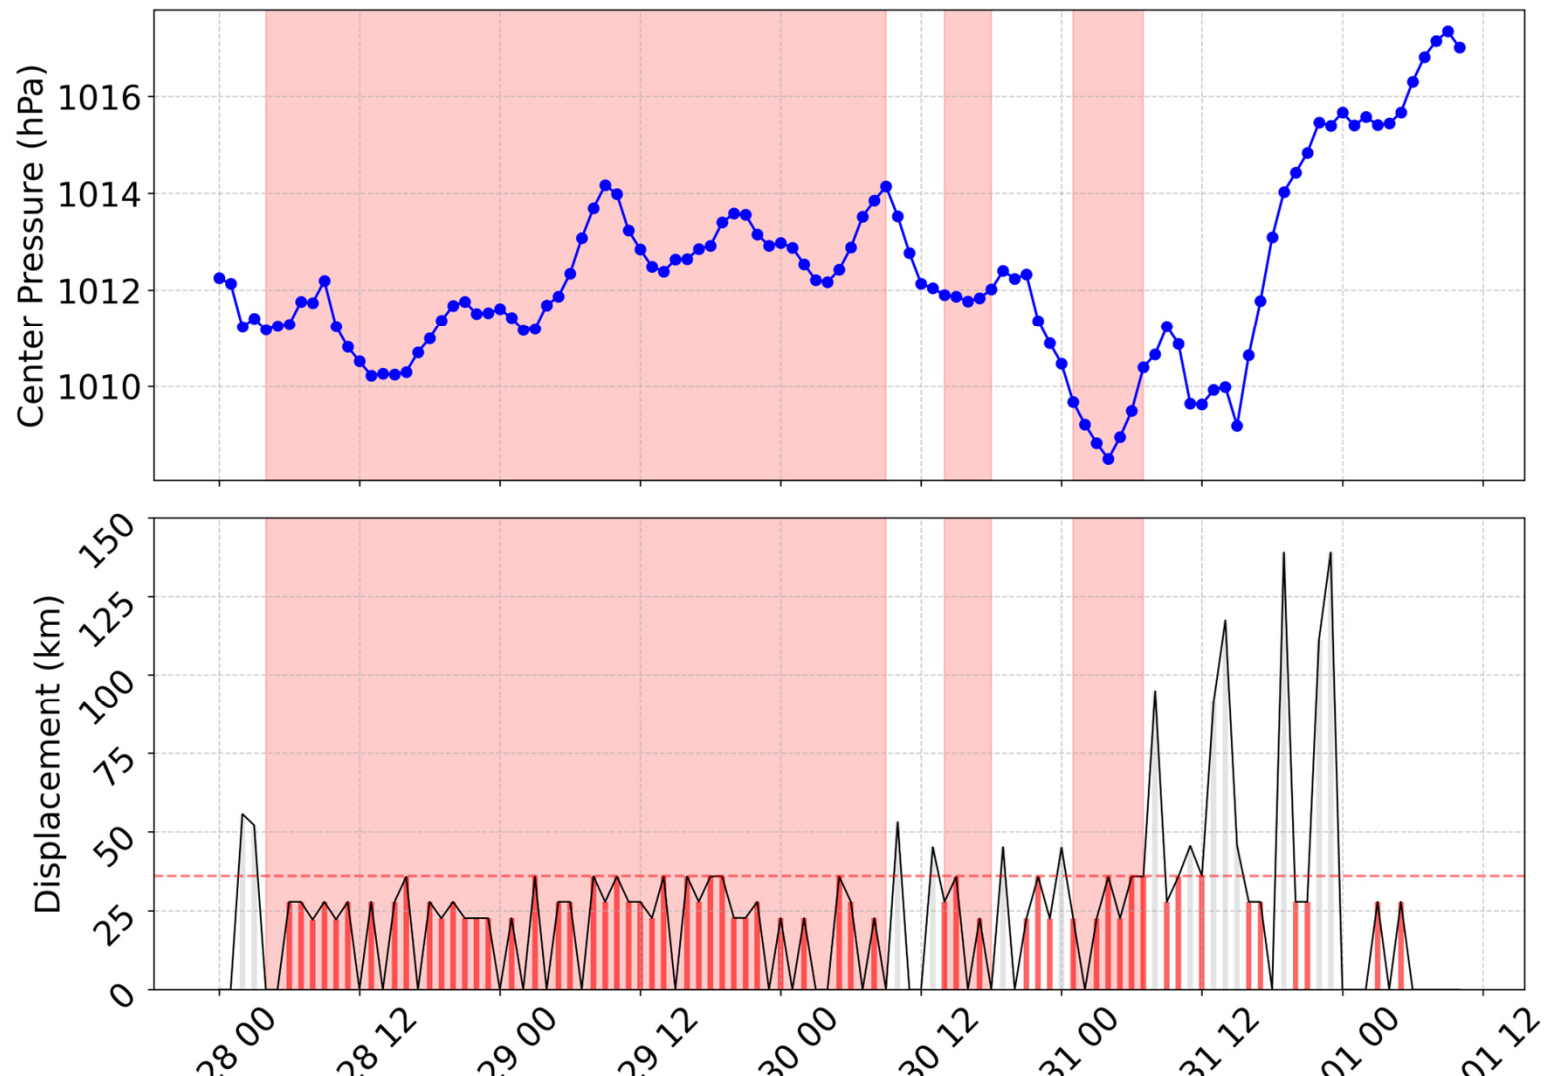

# NUMA – November 2017

Numa Cyclone Track with Wind Influence Areas

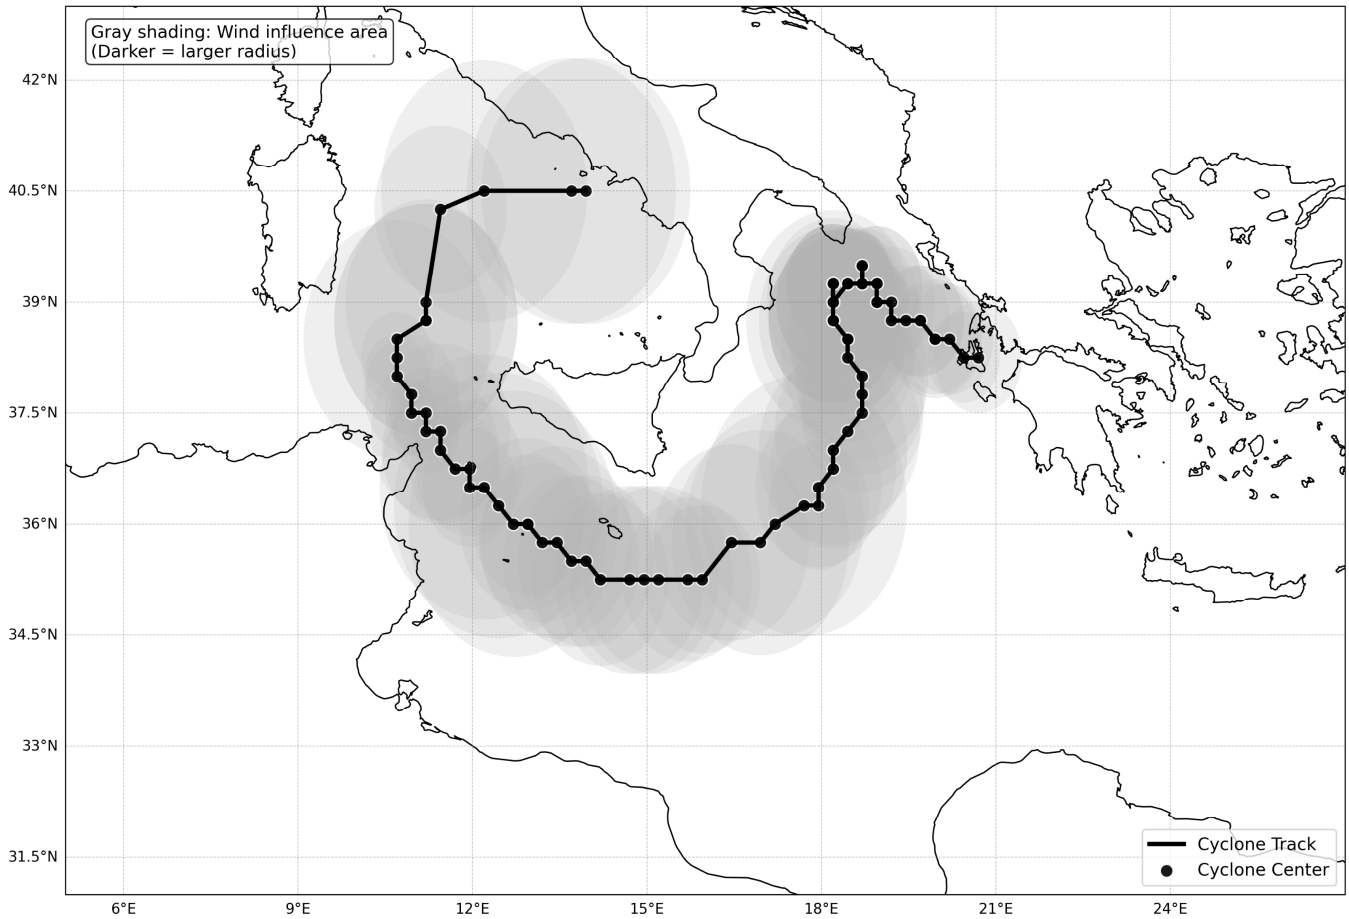

Cyclone Center Pressure and Movement

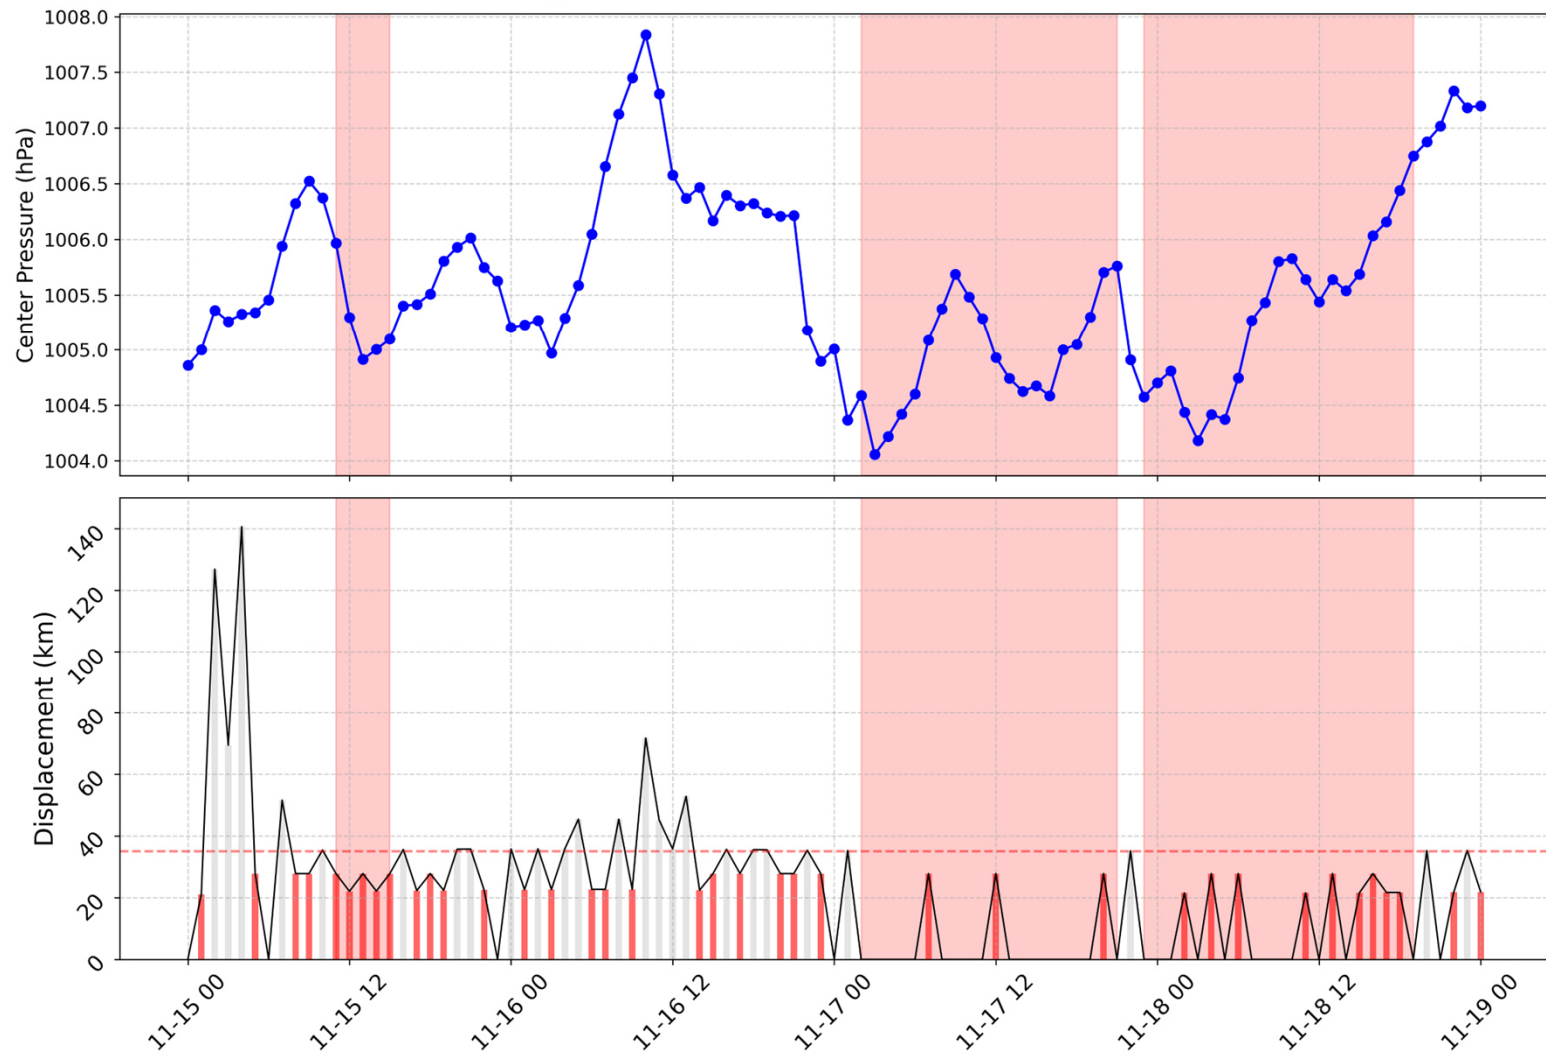

# ZORBAS – September 2018

Zorbas Cyclone Track with Wind Influence Areas

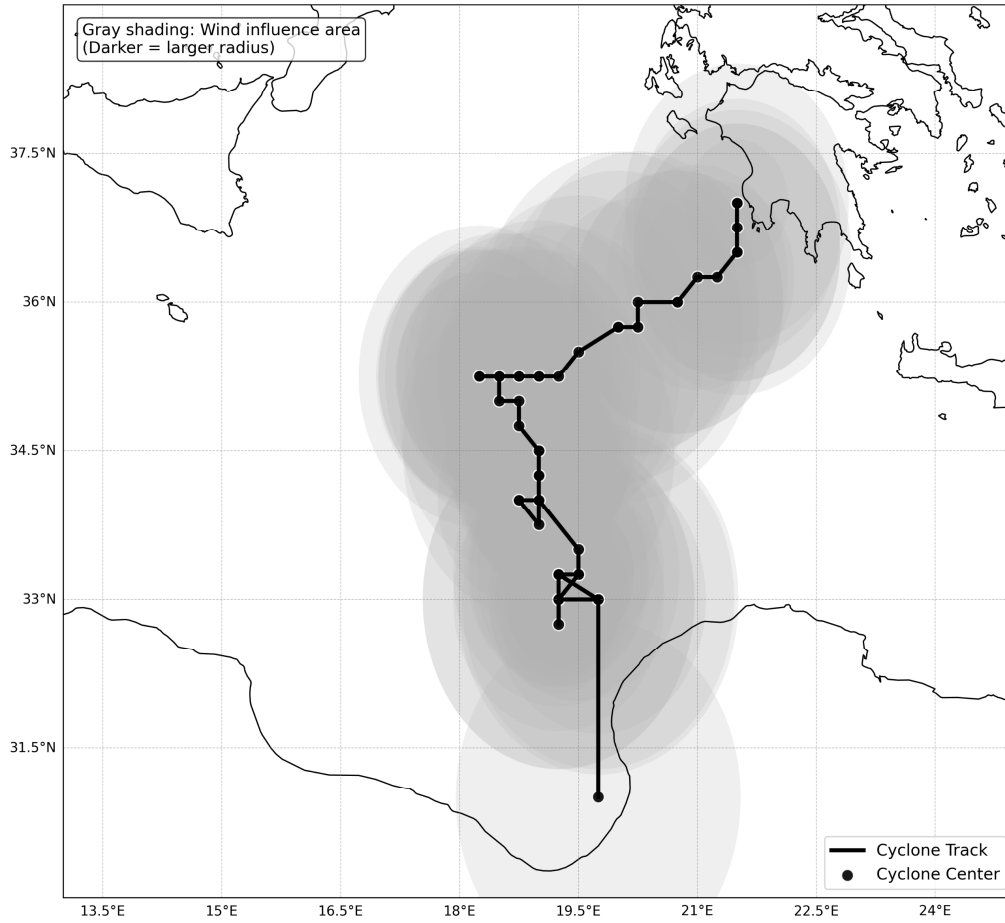

Cyclone Center Pressure and Movement

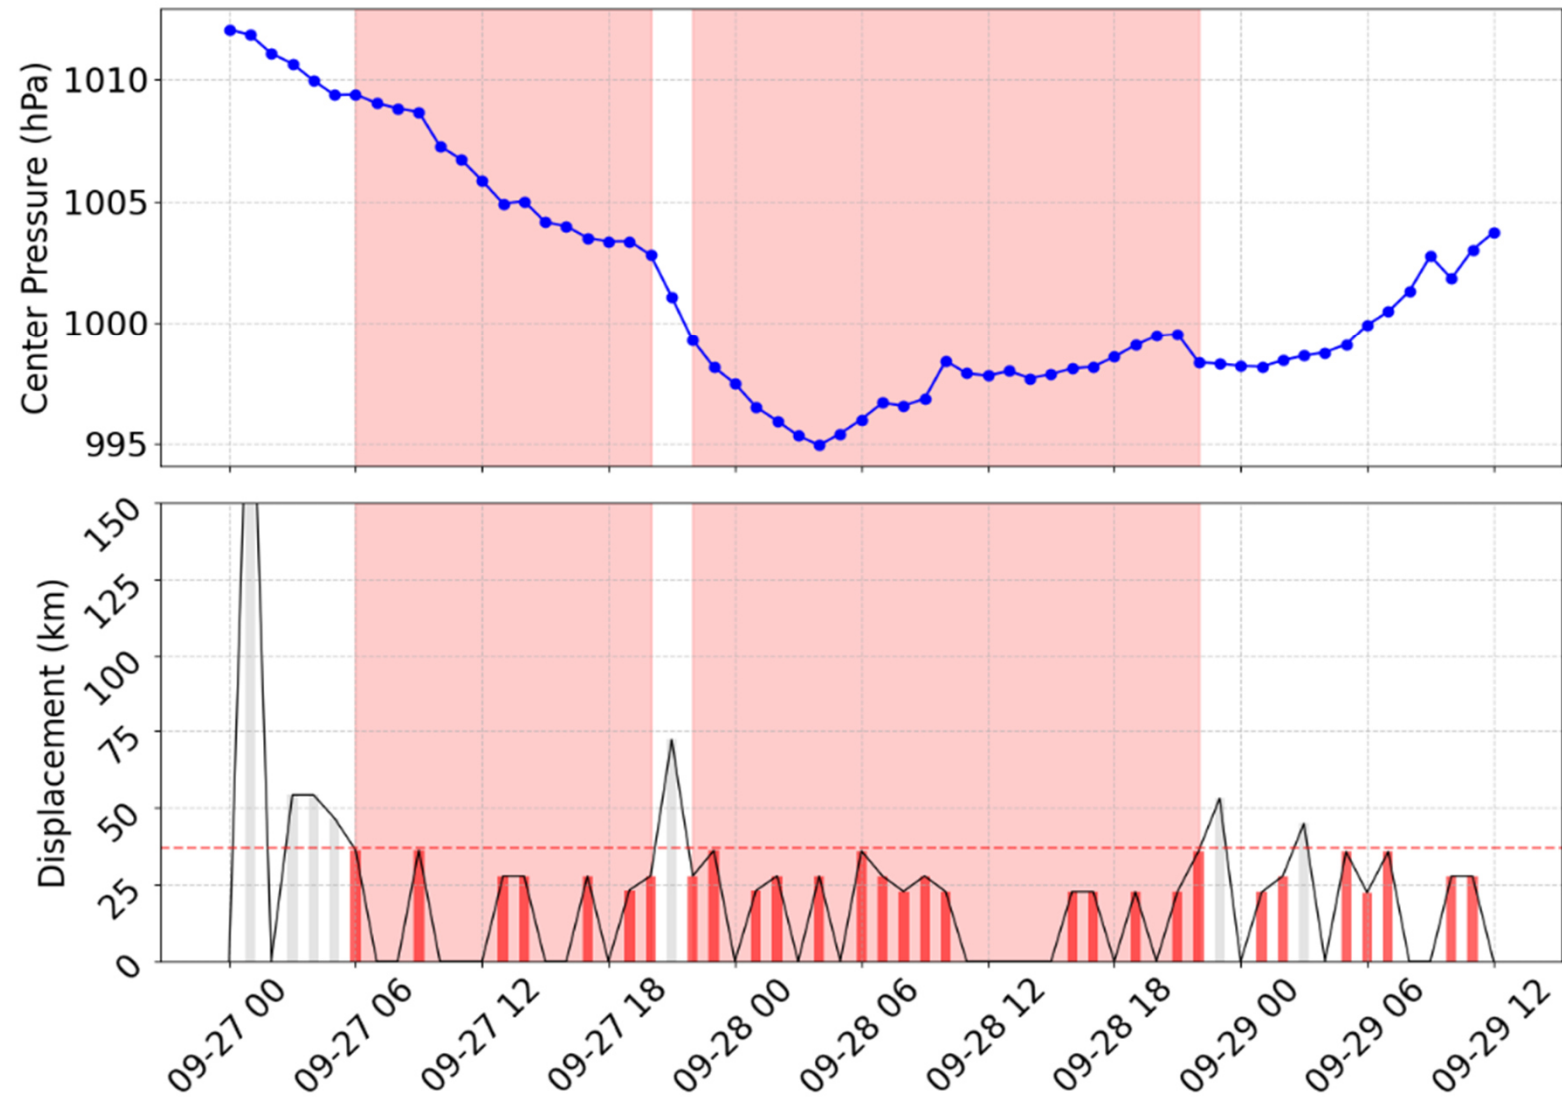

# VAIA – October 2018

Vaia Cyclone Track with Wind Influence Areas

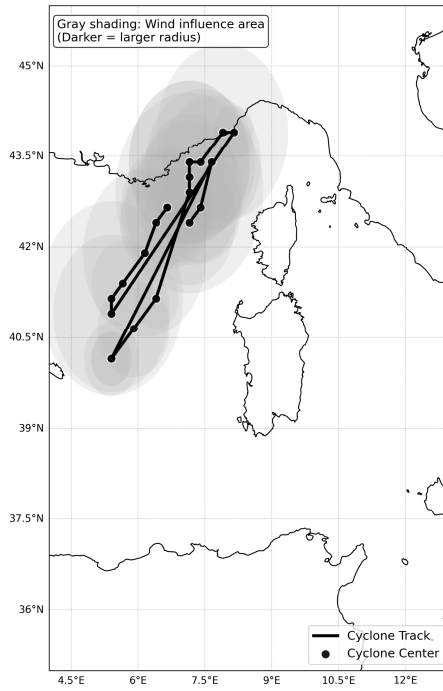

Cyclone Center Pressure and Movement

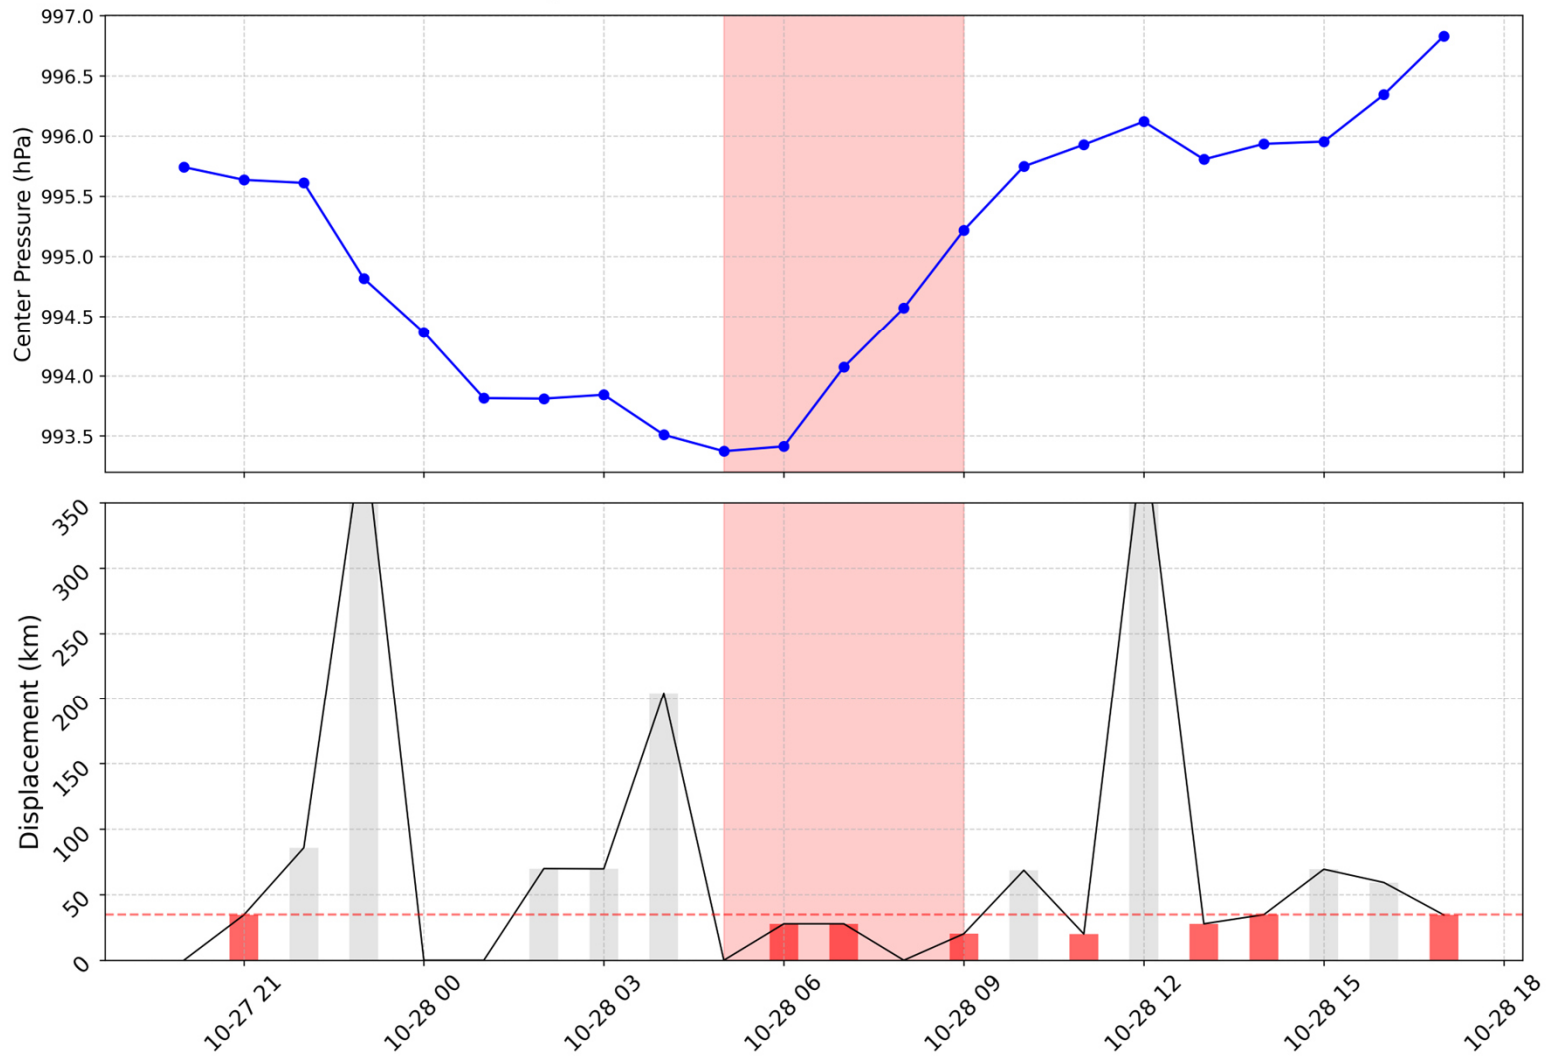



# TRUDY – November 2019

Trudy Cyclone Track with Wind Influence Areas

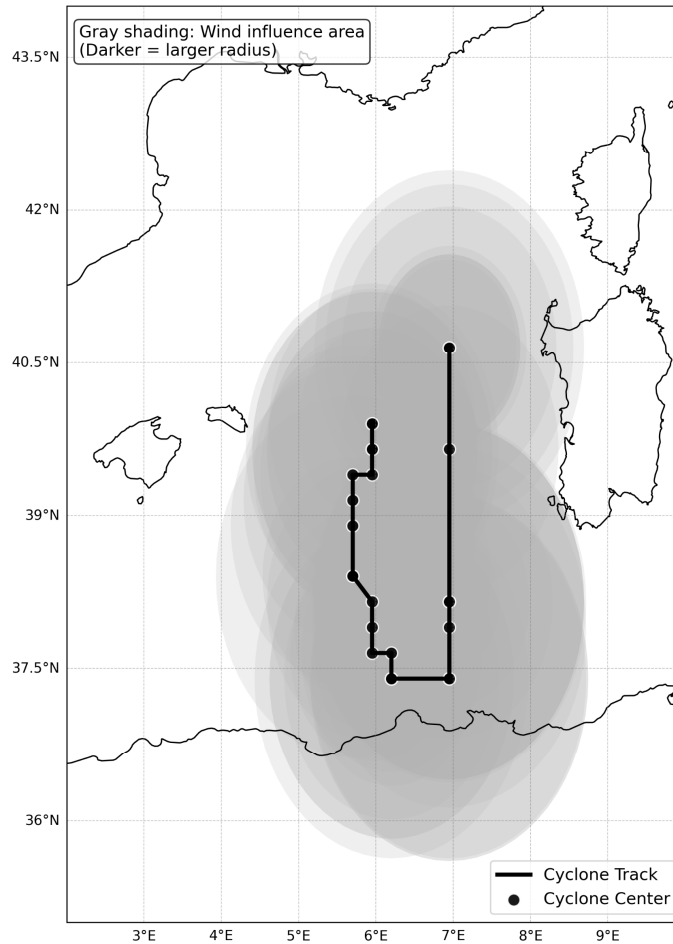

Cyclone Center Pressure and Movement

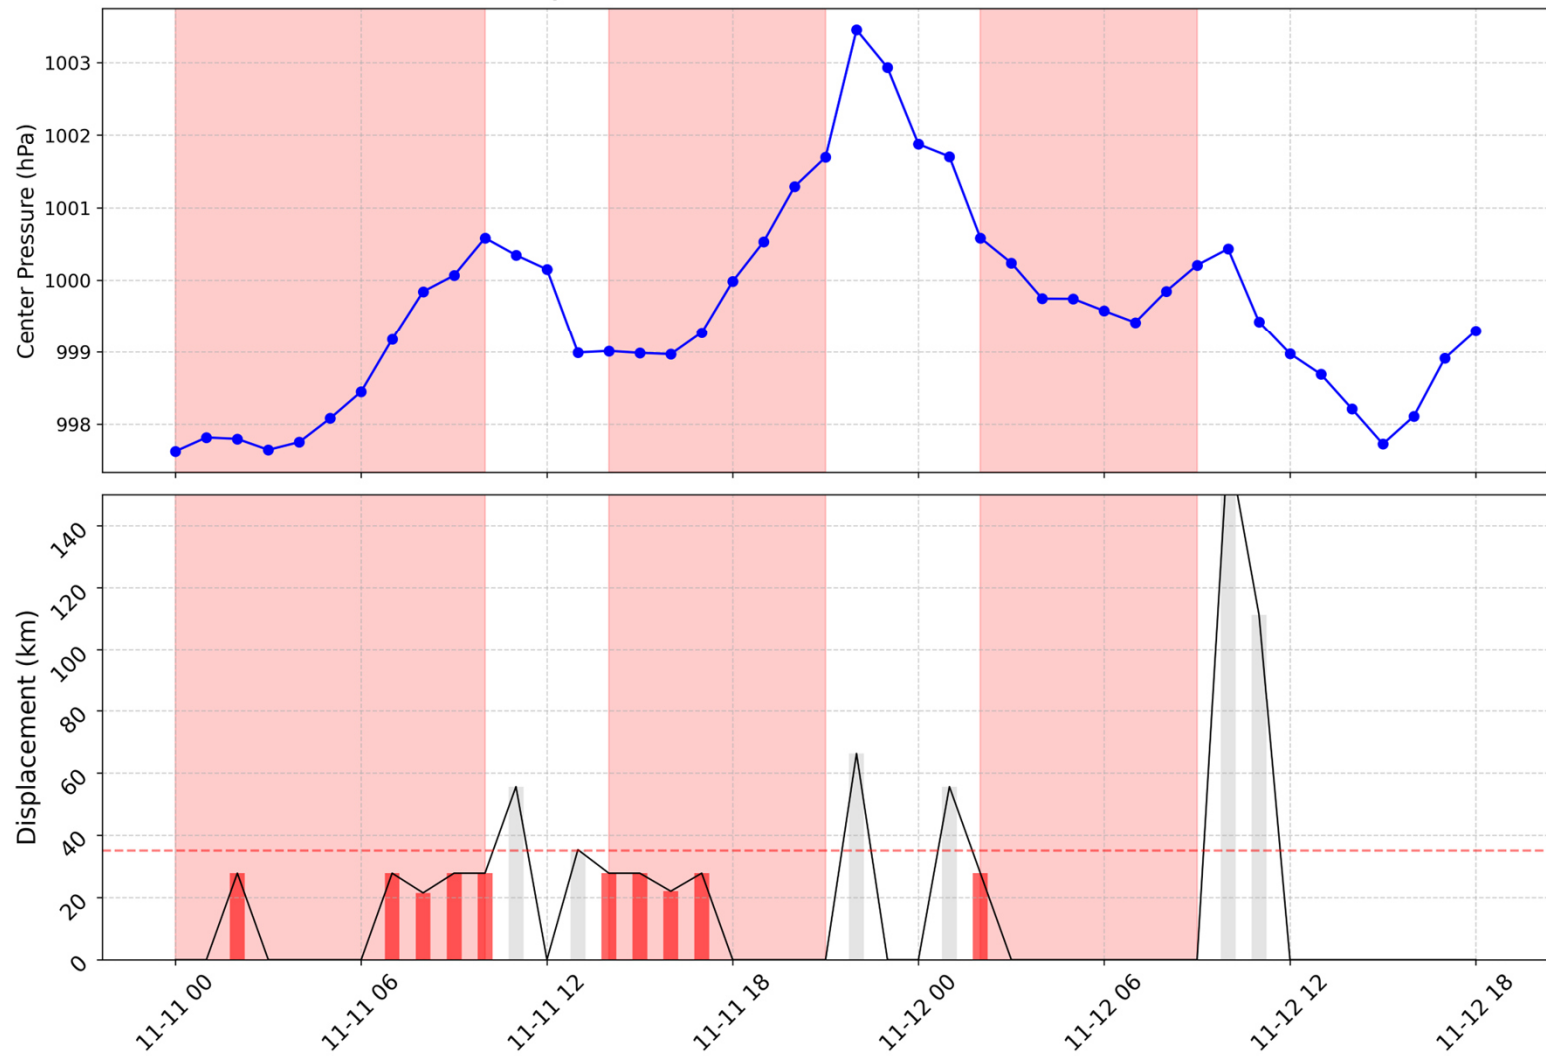

# IANOS – September 2020

Ianos Cyclone Track with Wind Influence Areas

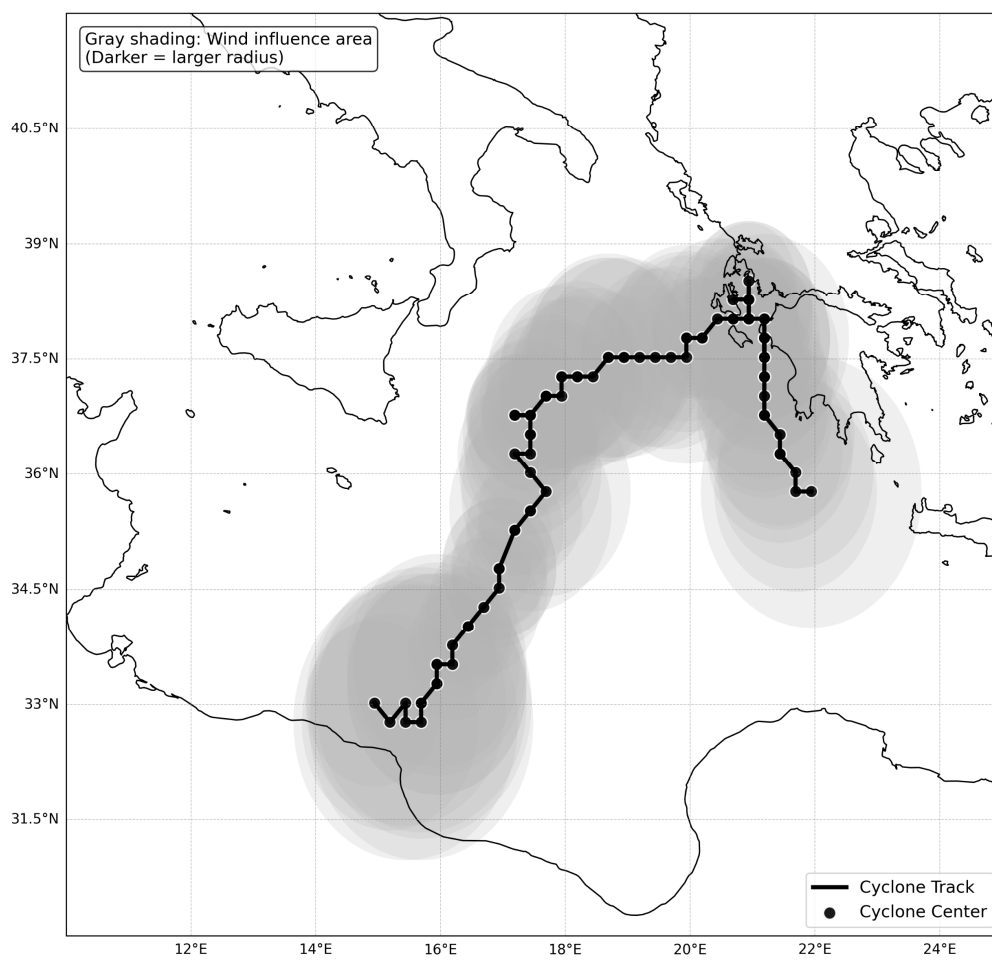

Cyclone Center Pressure and Movement

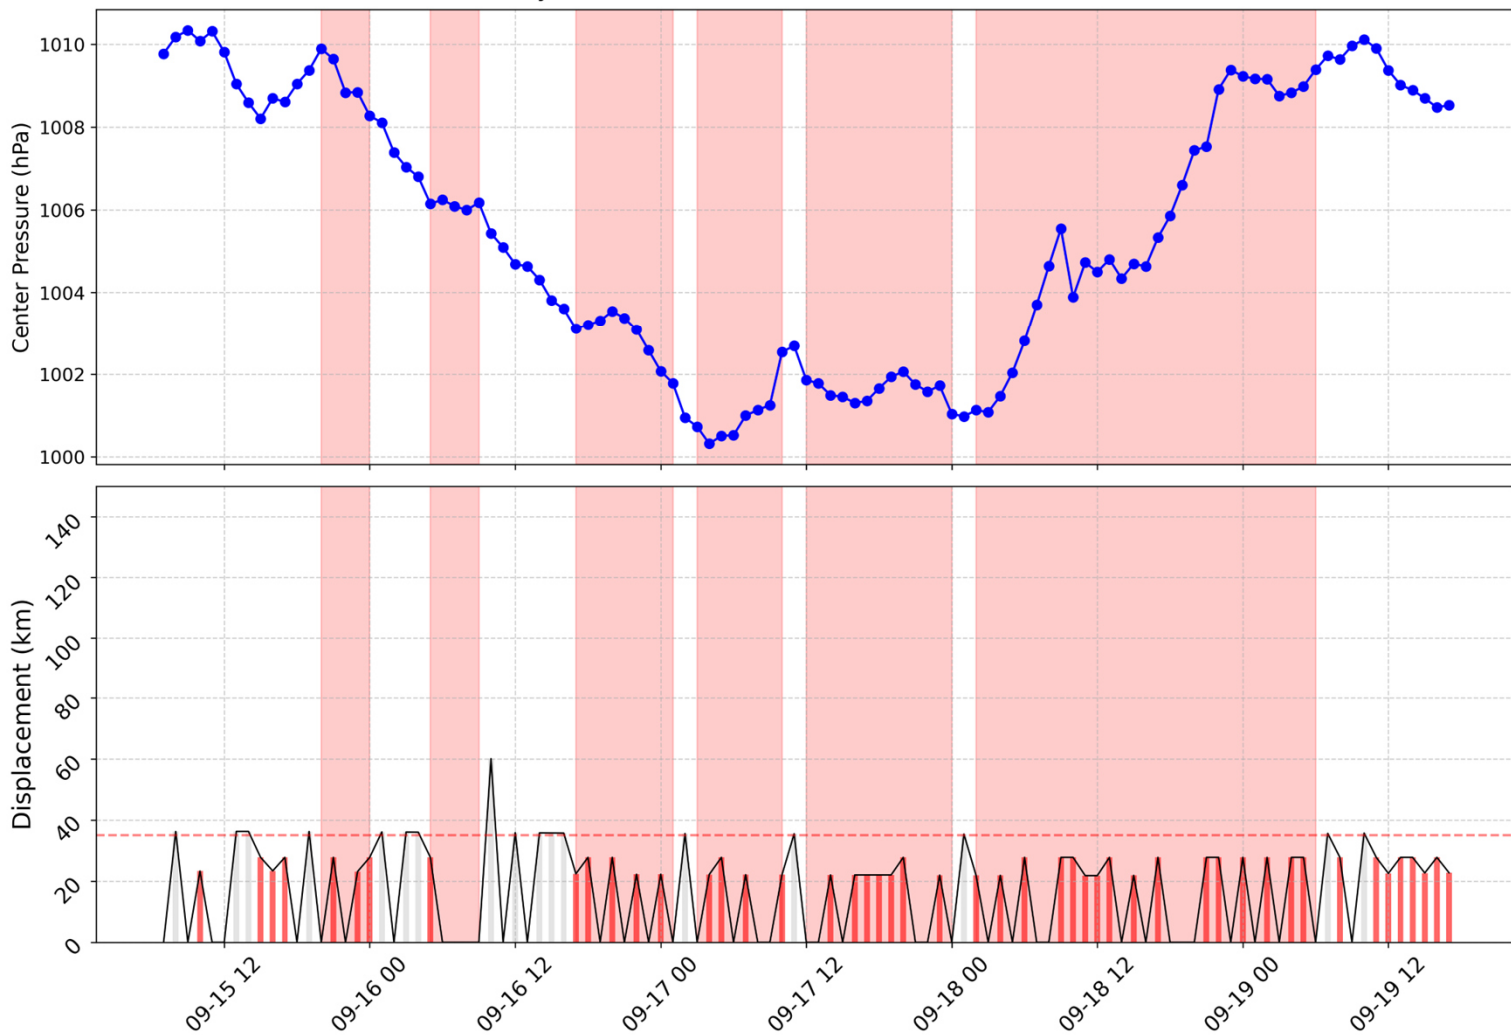

# APOLLO – October 2021

Apollo Cyclone Track with Wind Influence Areas

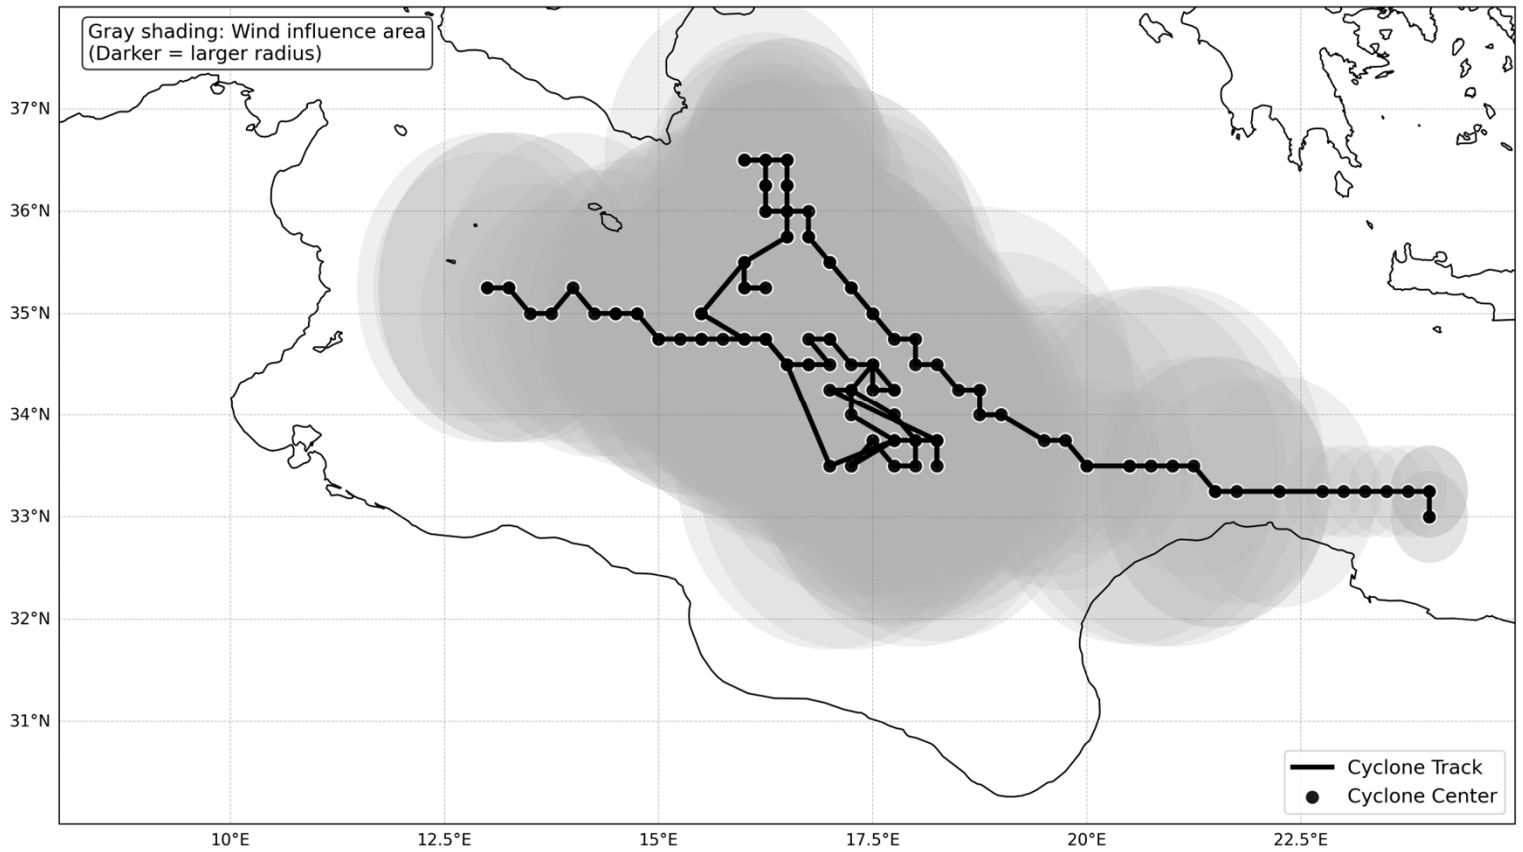

Cyclone Center Pressure and Movement

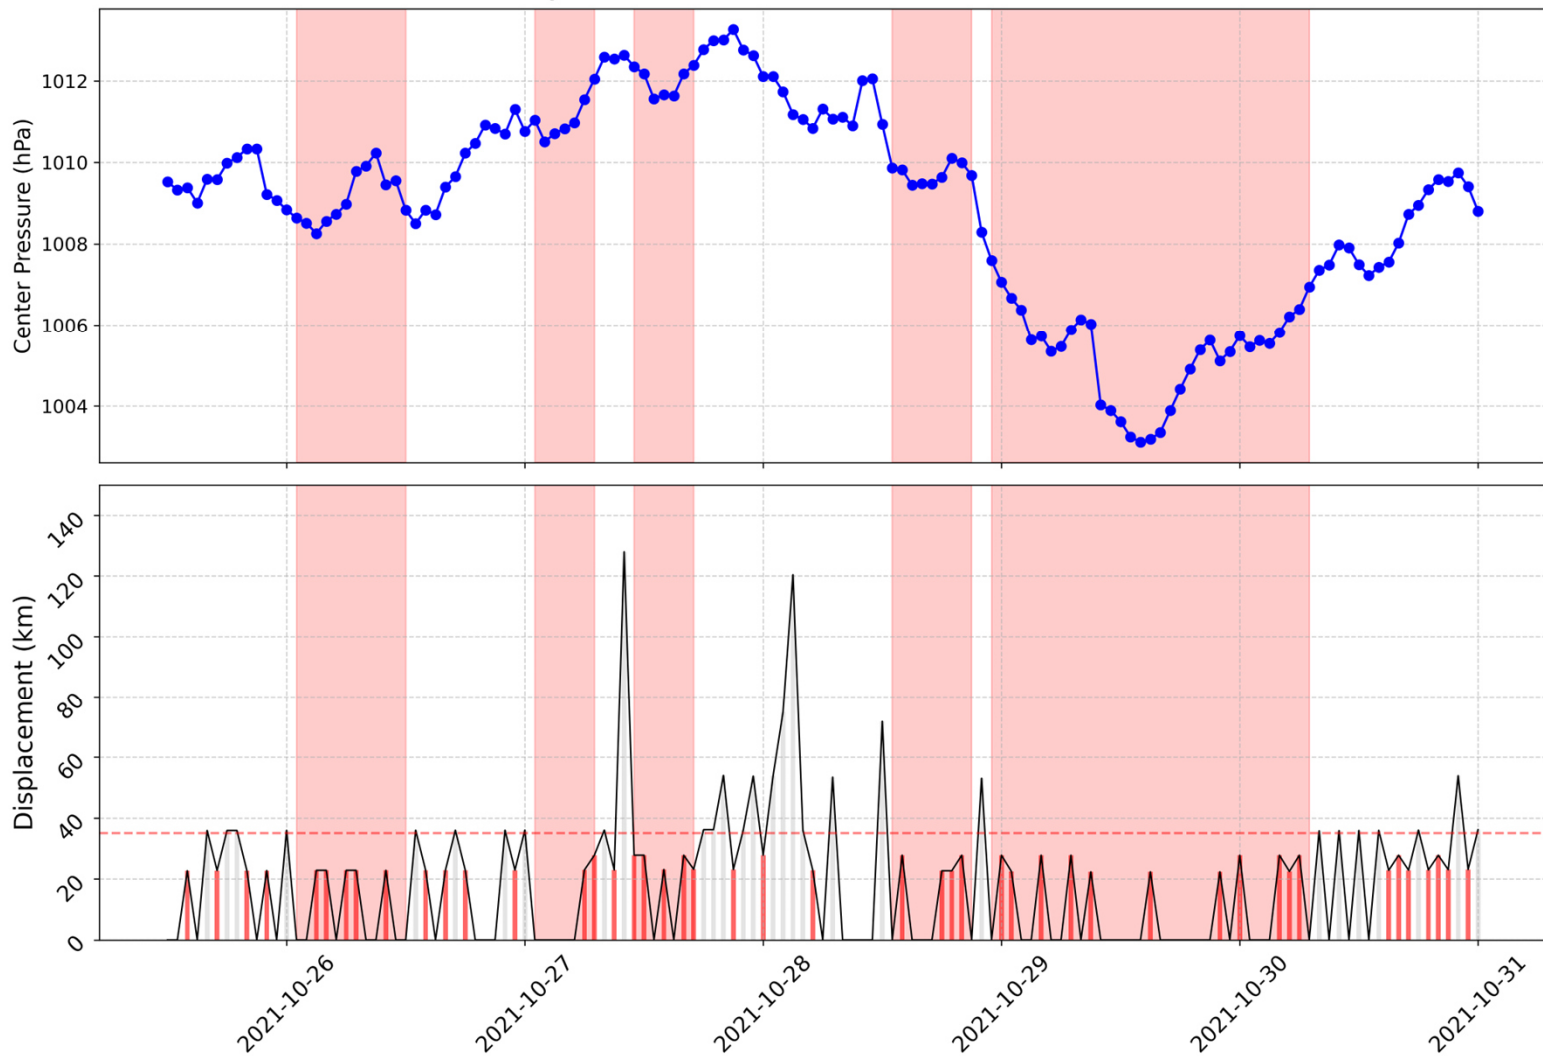

# BLAS – November 2021

Blas Cyclone Track with Wind Influence Areas

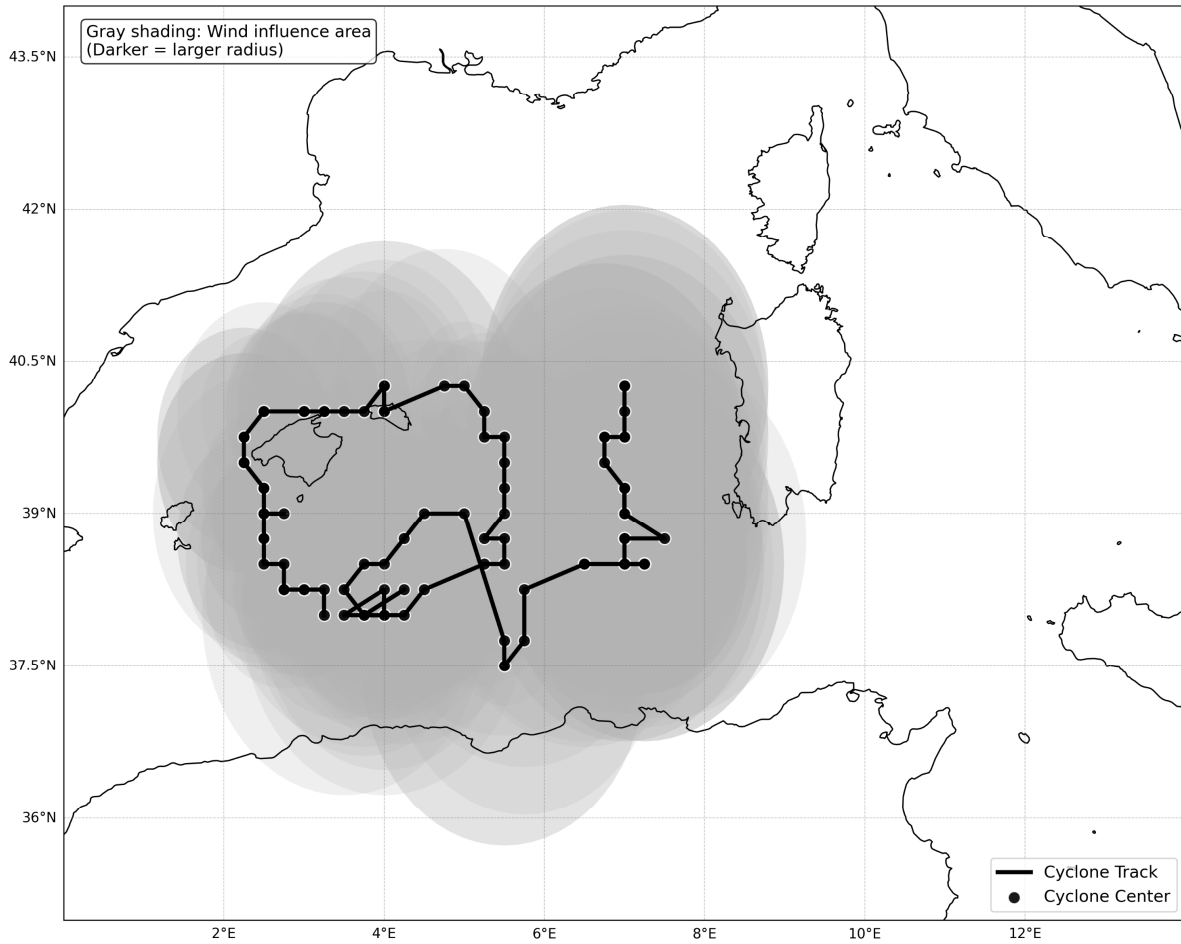

Cyclone Center Pressure and Movement

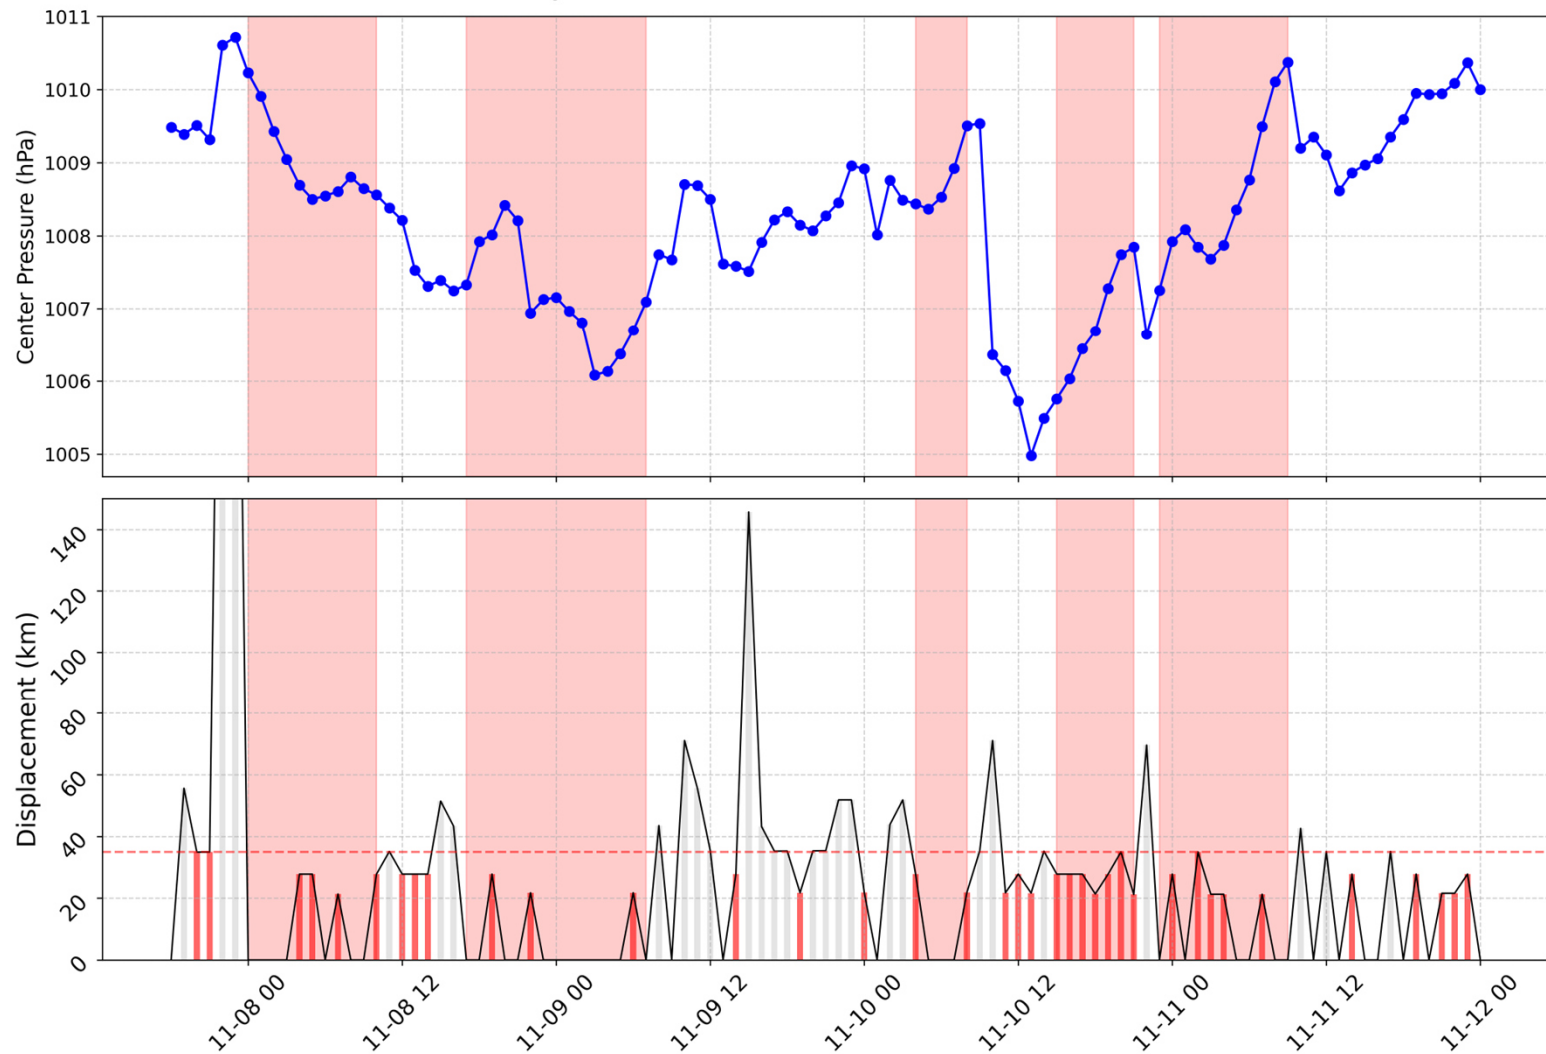



# CIPRIAN – October 2022

Ciprian Cyclone Track with Wind Influence Areas

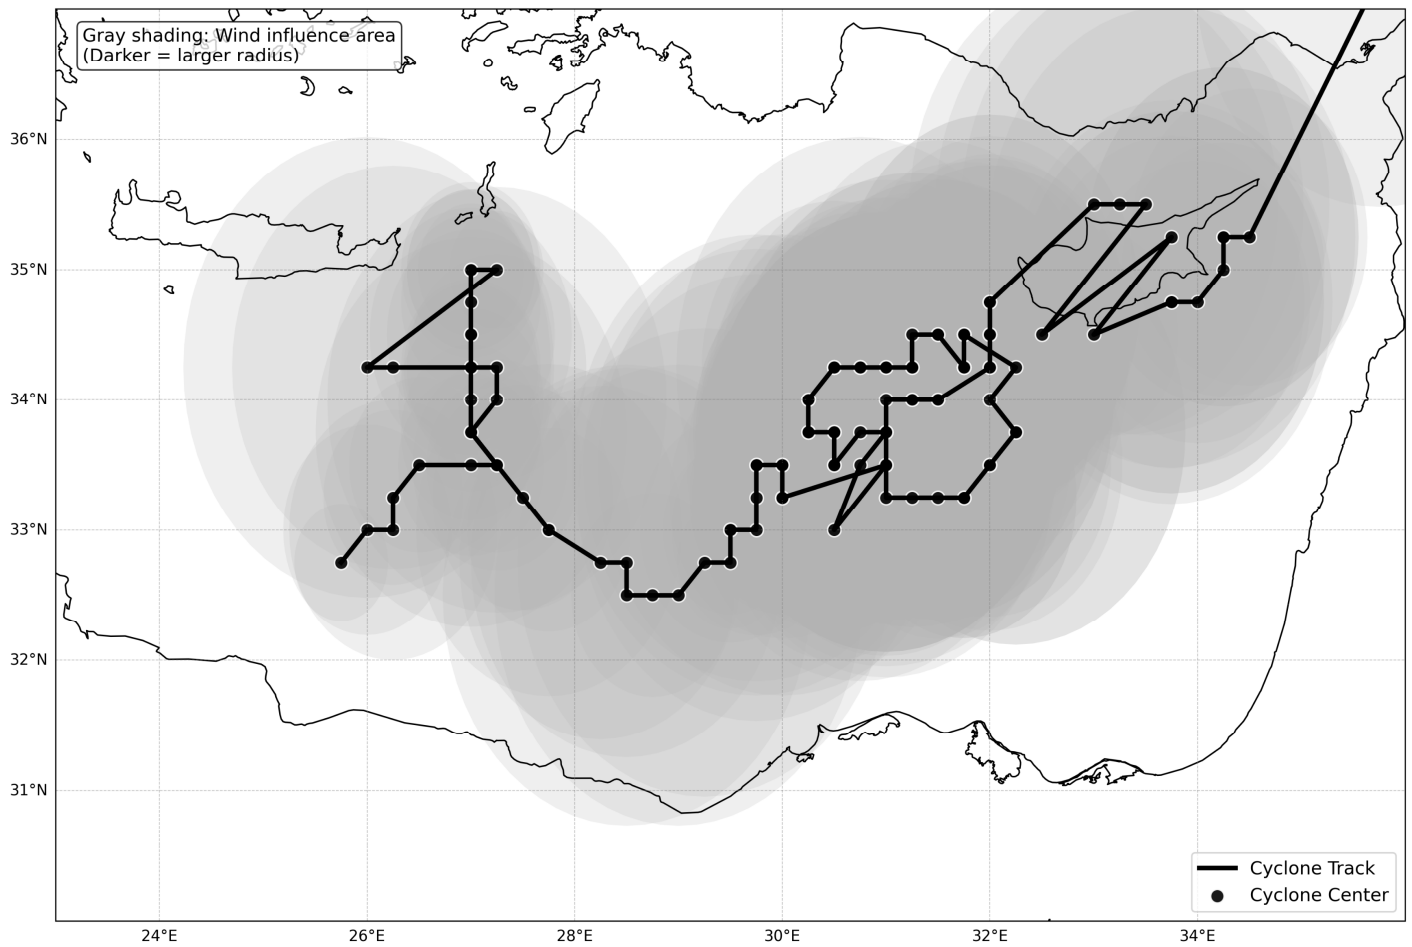

Cyclone Center Pressure and Movement

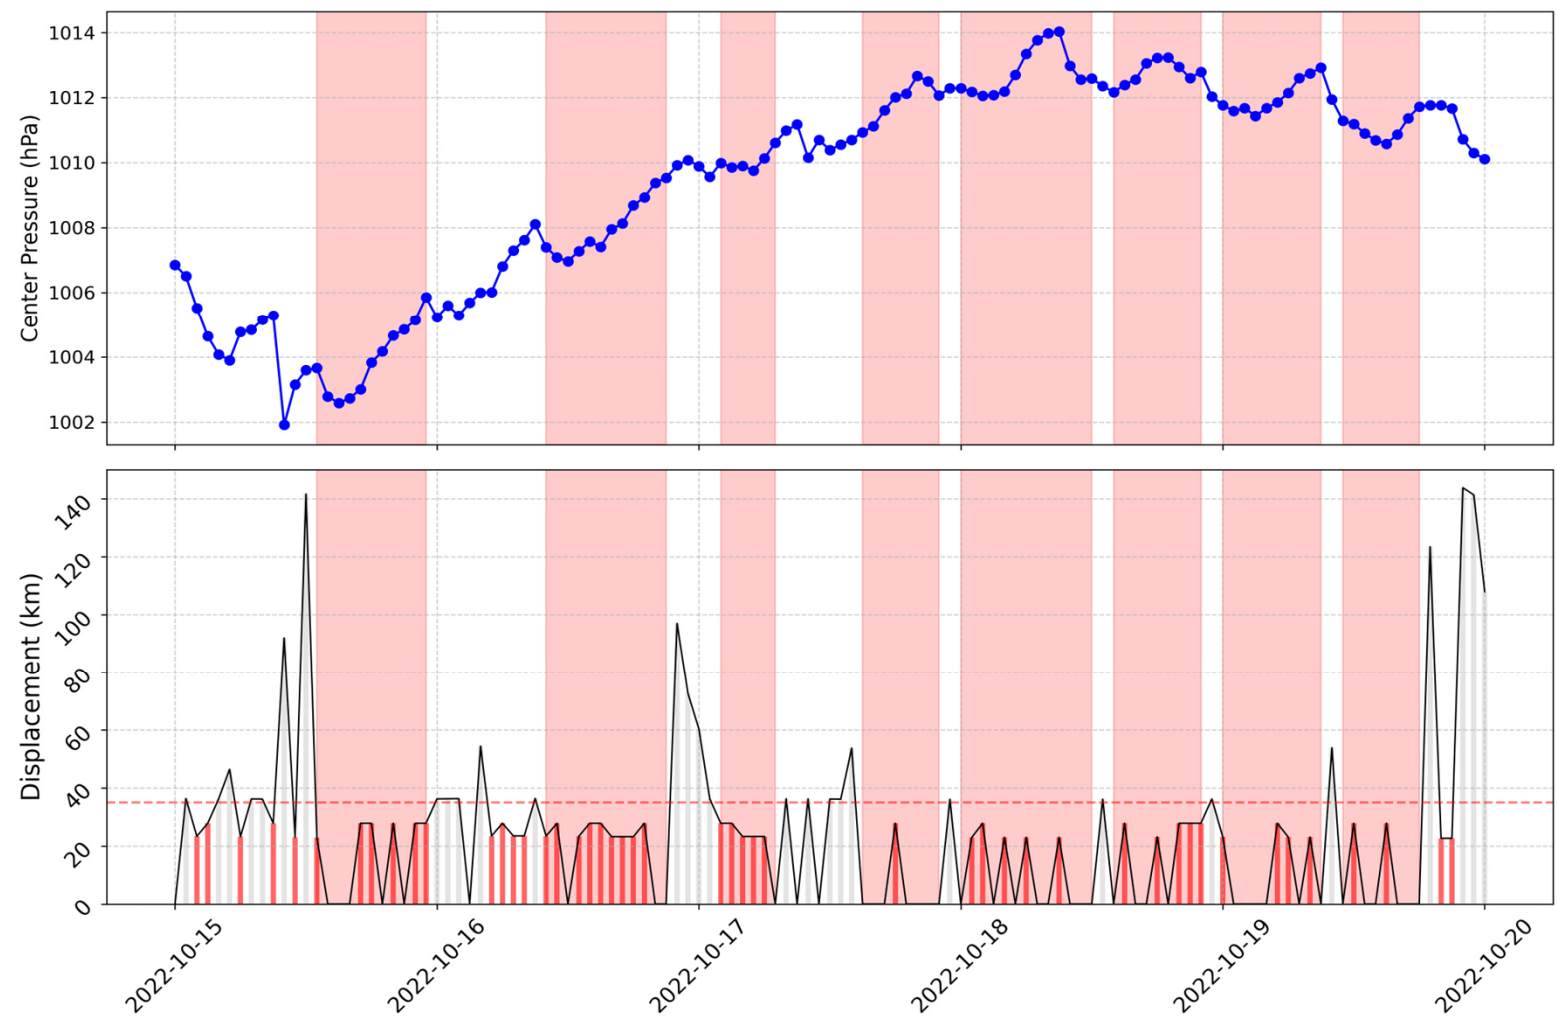

# HELIOS – February 2023

Helios Cyclone Track with Wind Influence Areas

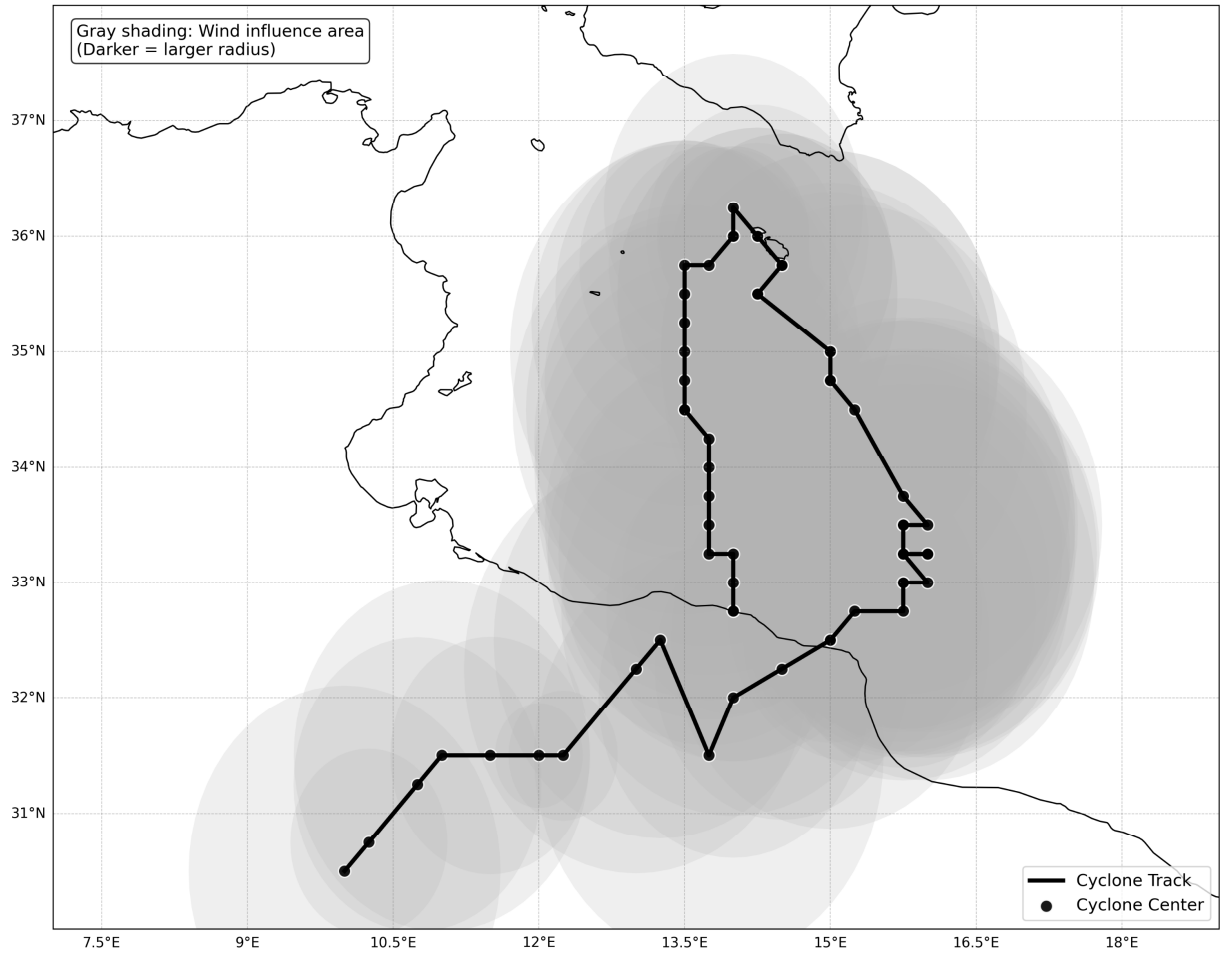

Cyclone Center Pressure and Movement

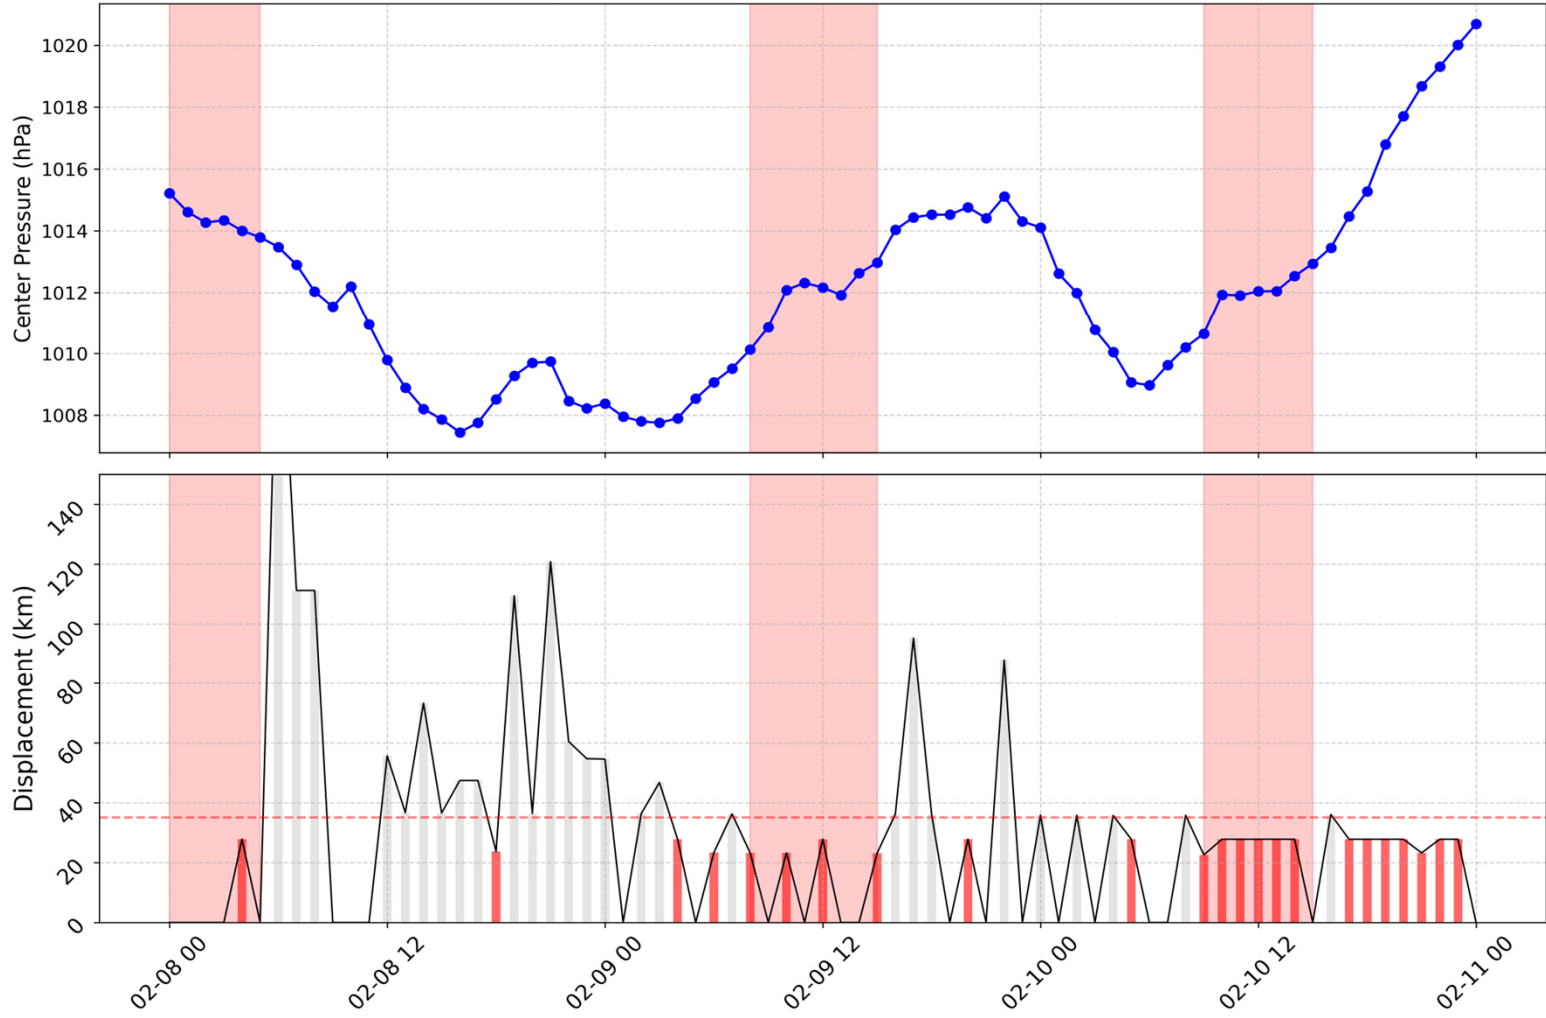

# JULIETTE – February-March 2023

Juliette Cyclone Track with Wind Influence Areas

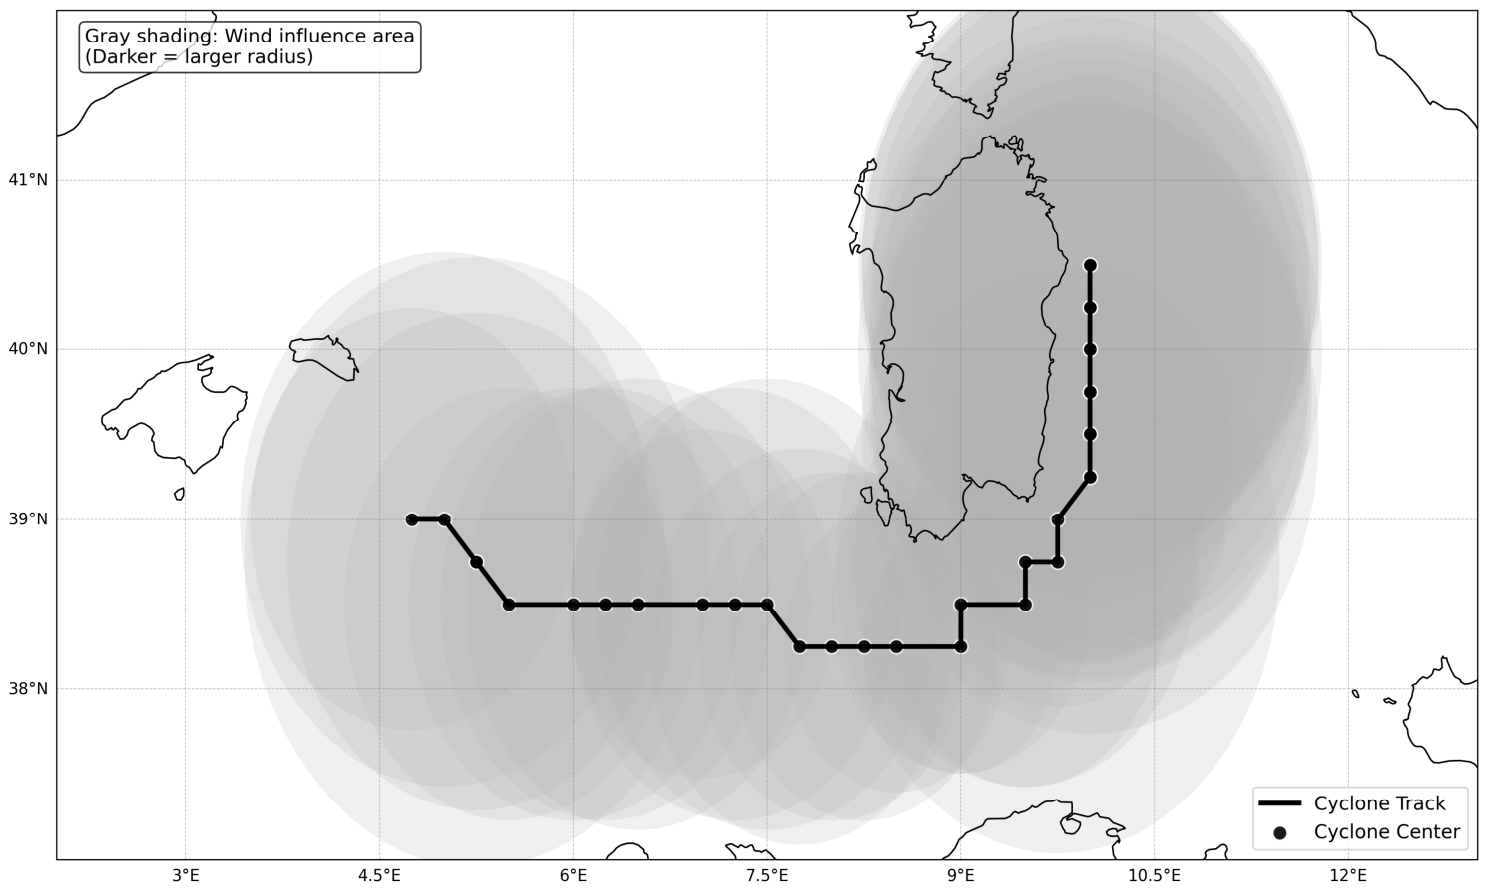

Cyclone Center Pressure and Movement

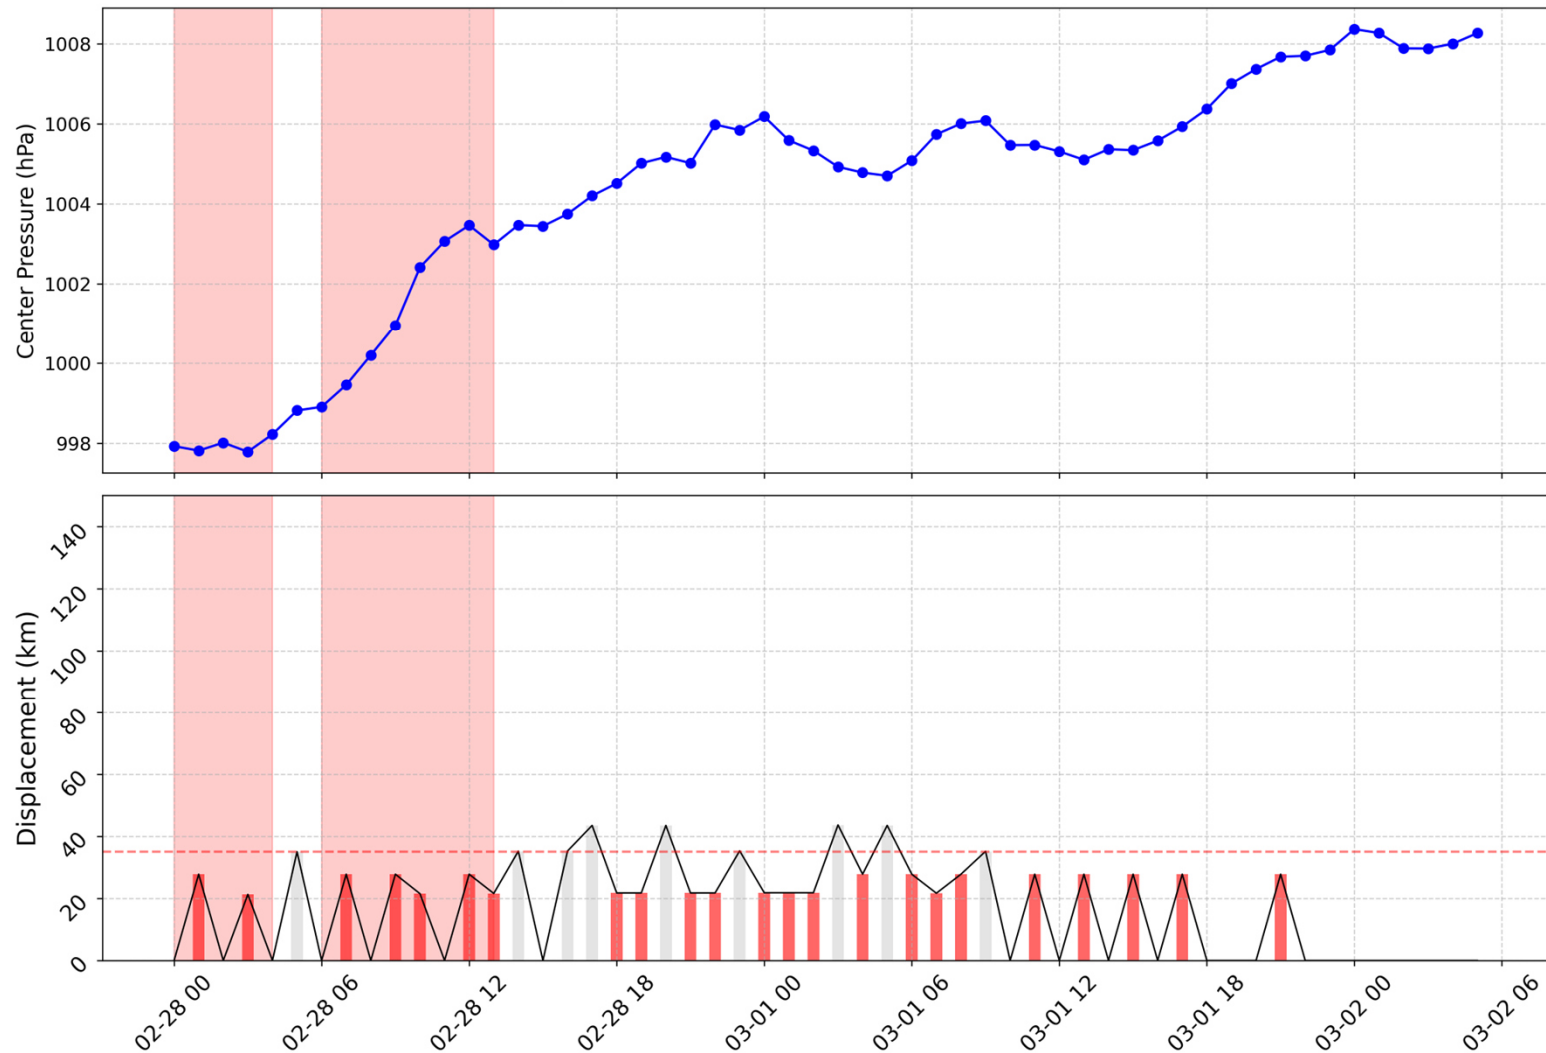

# DANIEL – September 2023

Daniel Cyclone Track with Wind Influence Areas

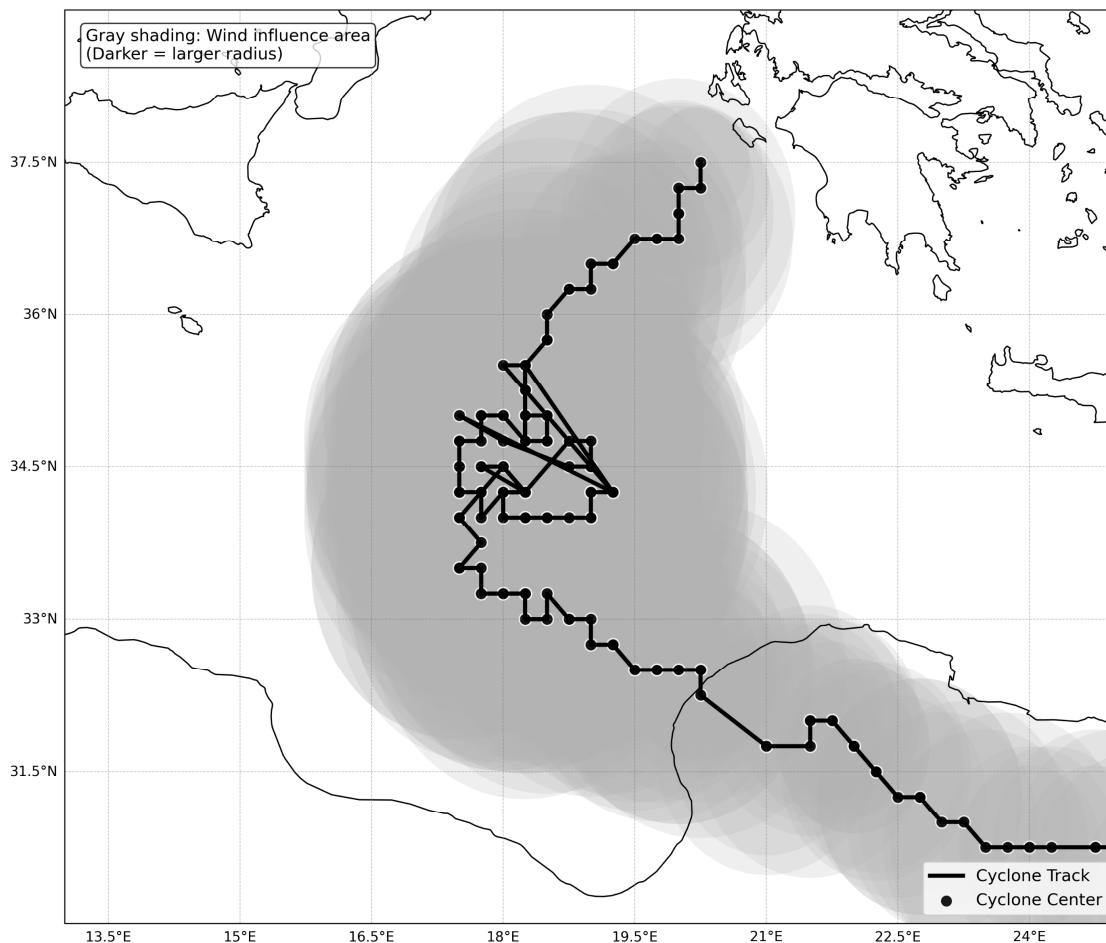

Cyclone Center Pressure and Movement

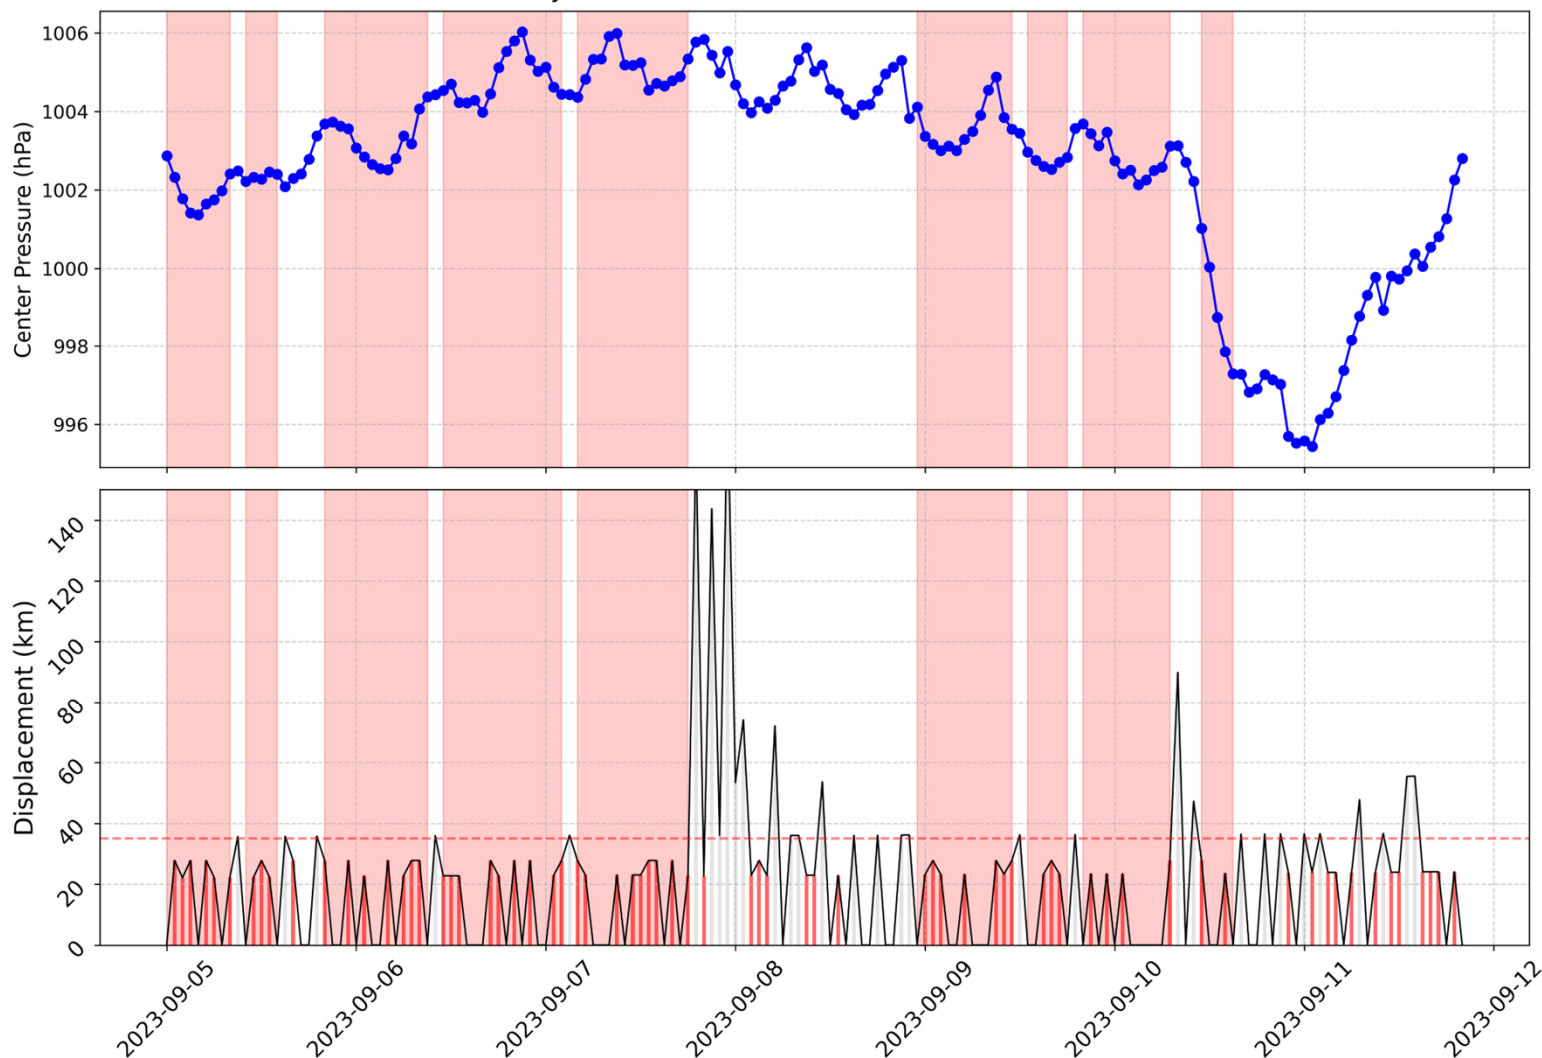

Supplement: Supplementary file [file egusphere-2025-3260-AC2-supplement.pdf]
