# Supplementary material for: When Storms Stir the Mediterranean Depths: Chlorophyll-a Response to Mediterranean Hurricanes
Source: Copernicus journal article supplement (doi:10.5194/egusphere-2025-3260), 2025-07-18

# ZEO – 12-15 December 2005

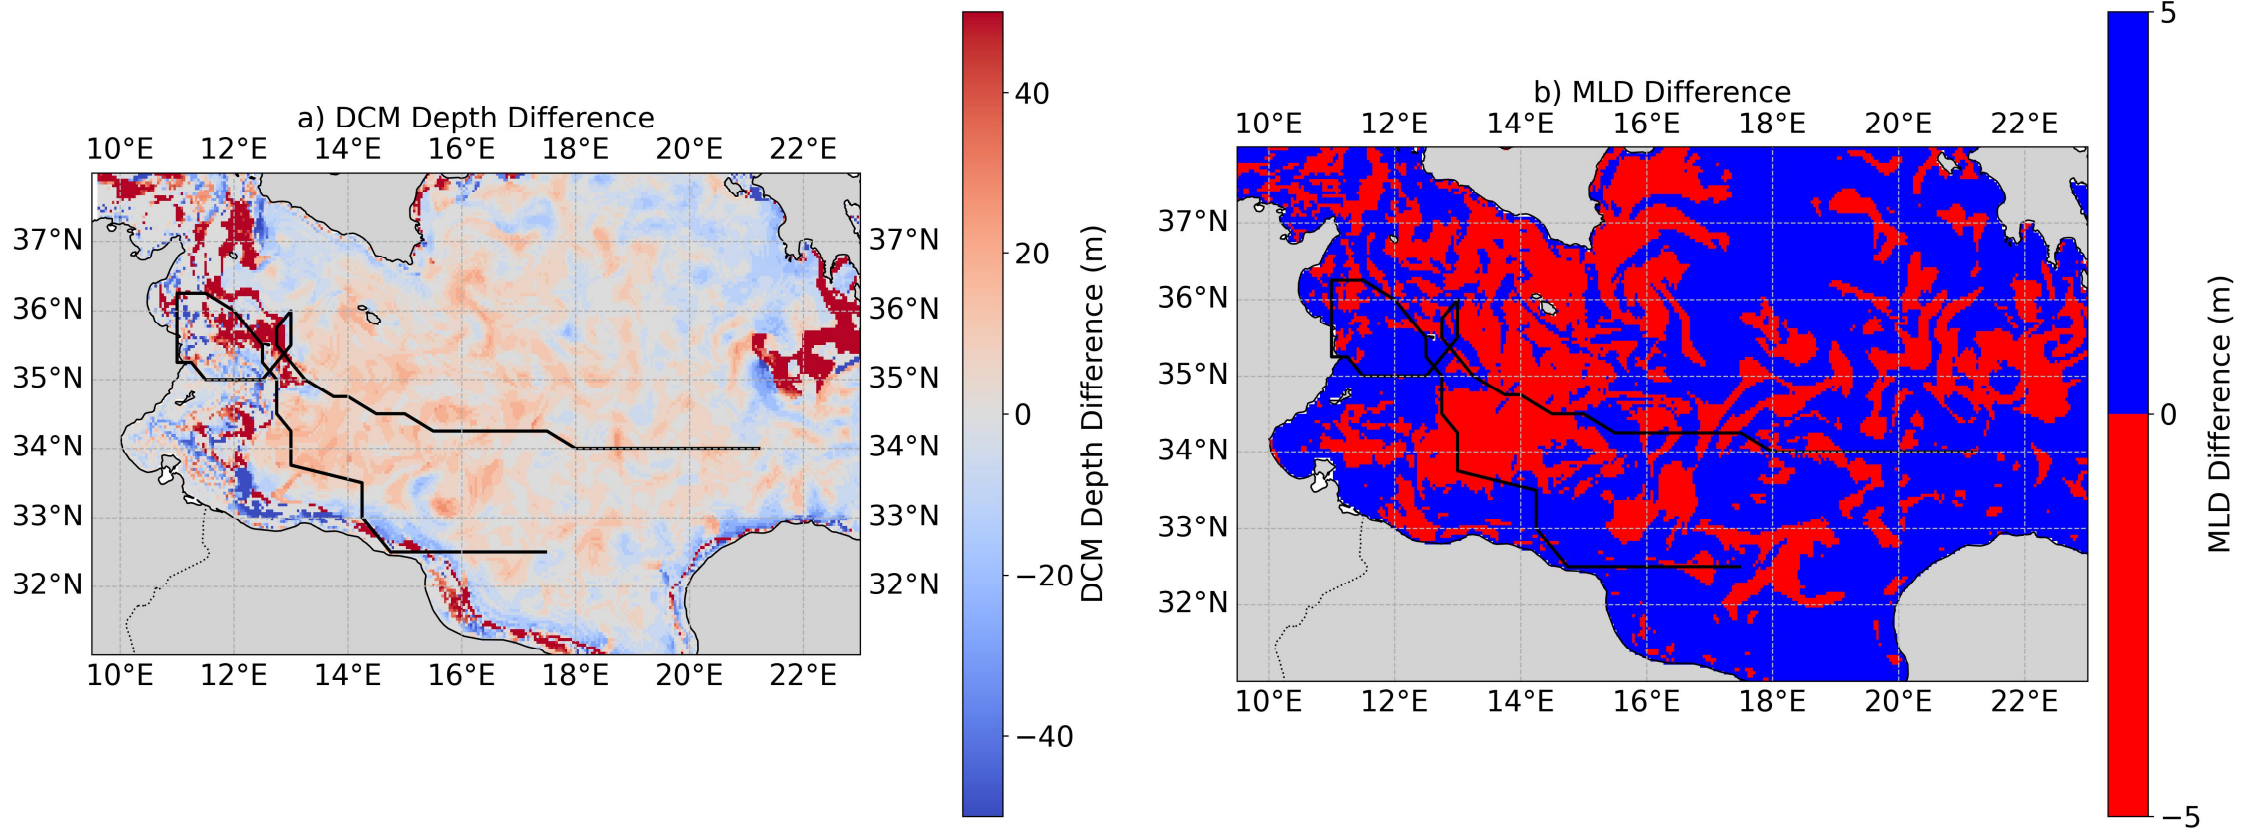

JANET – 13-19 October 2007

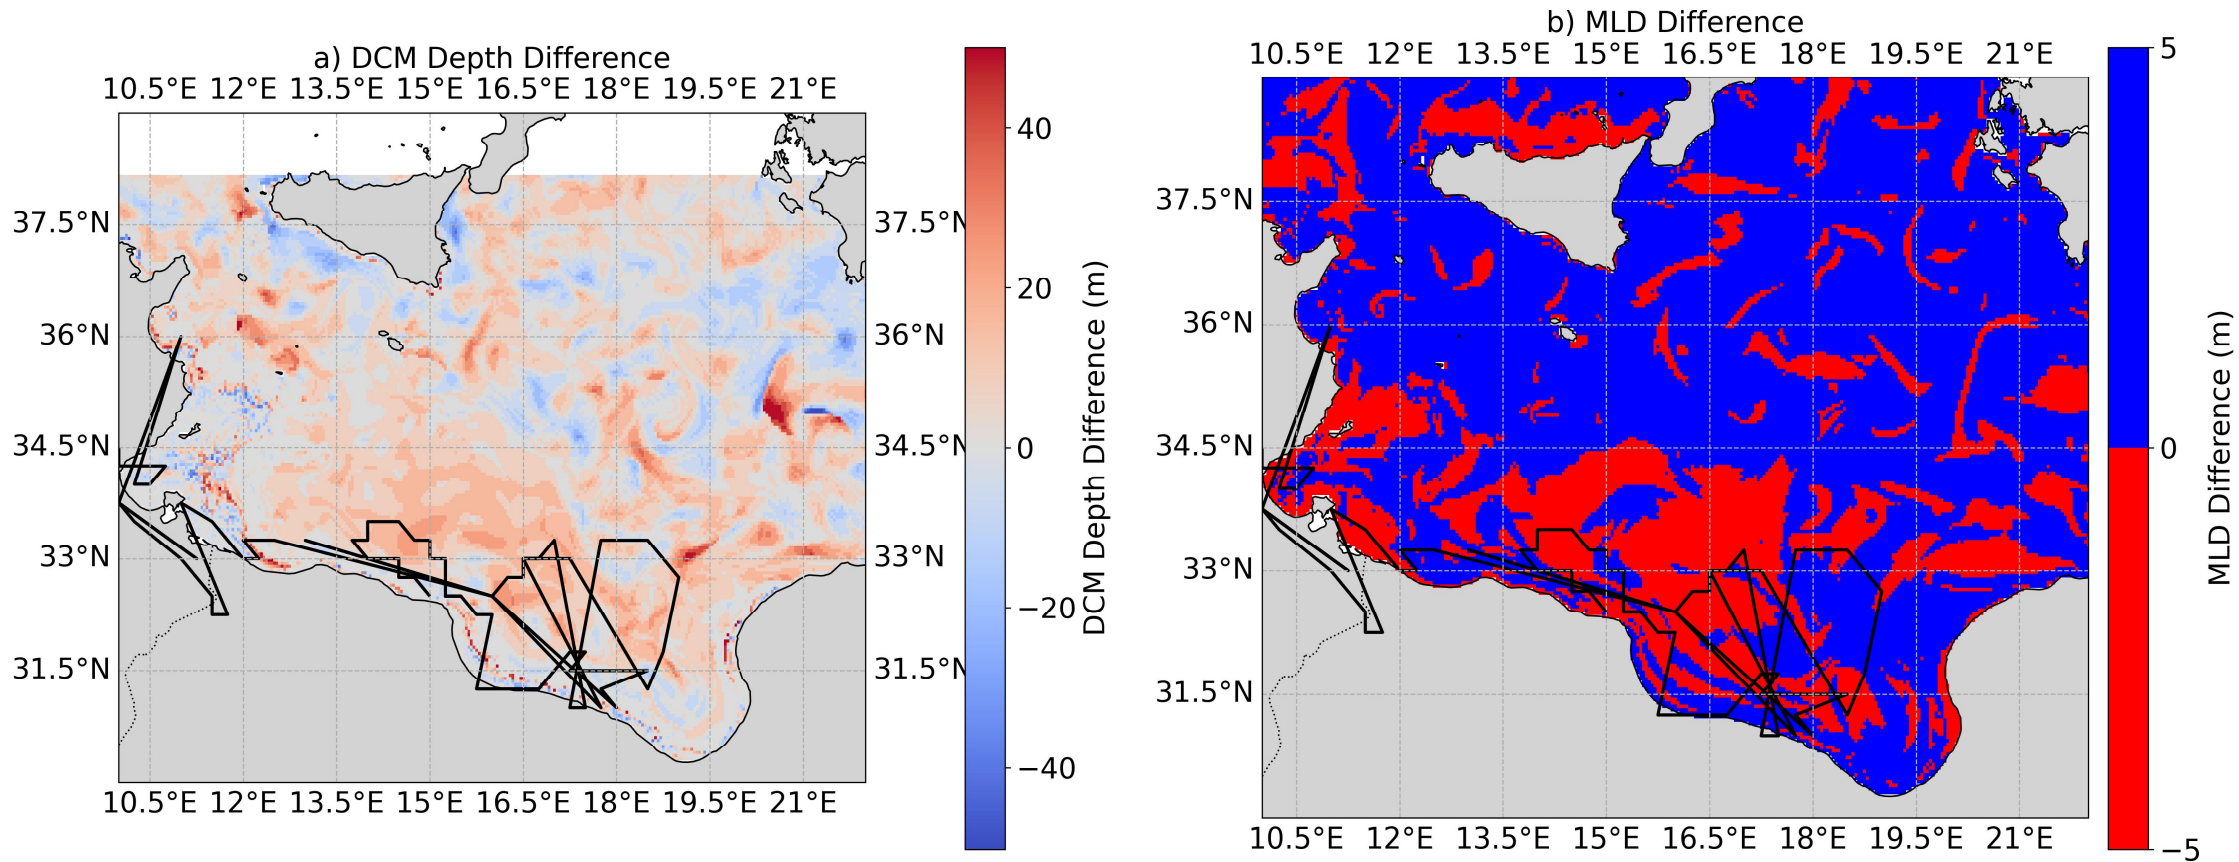

# AKLE – 01-02 January 2011

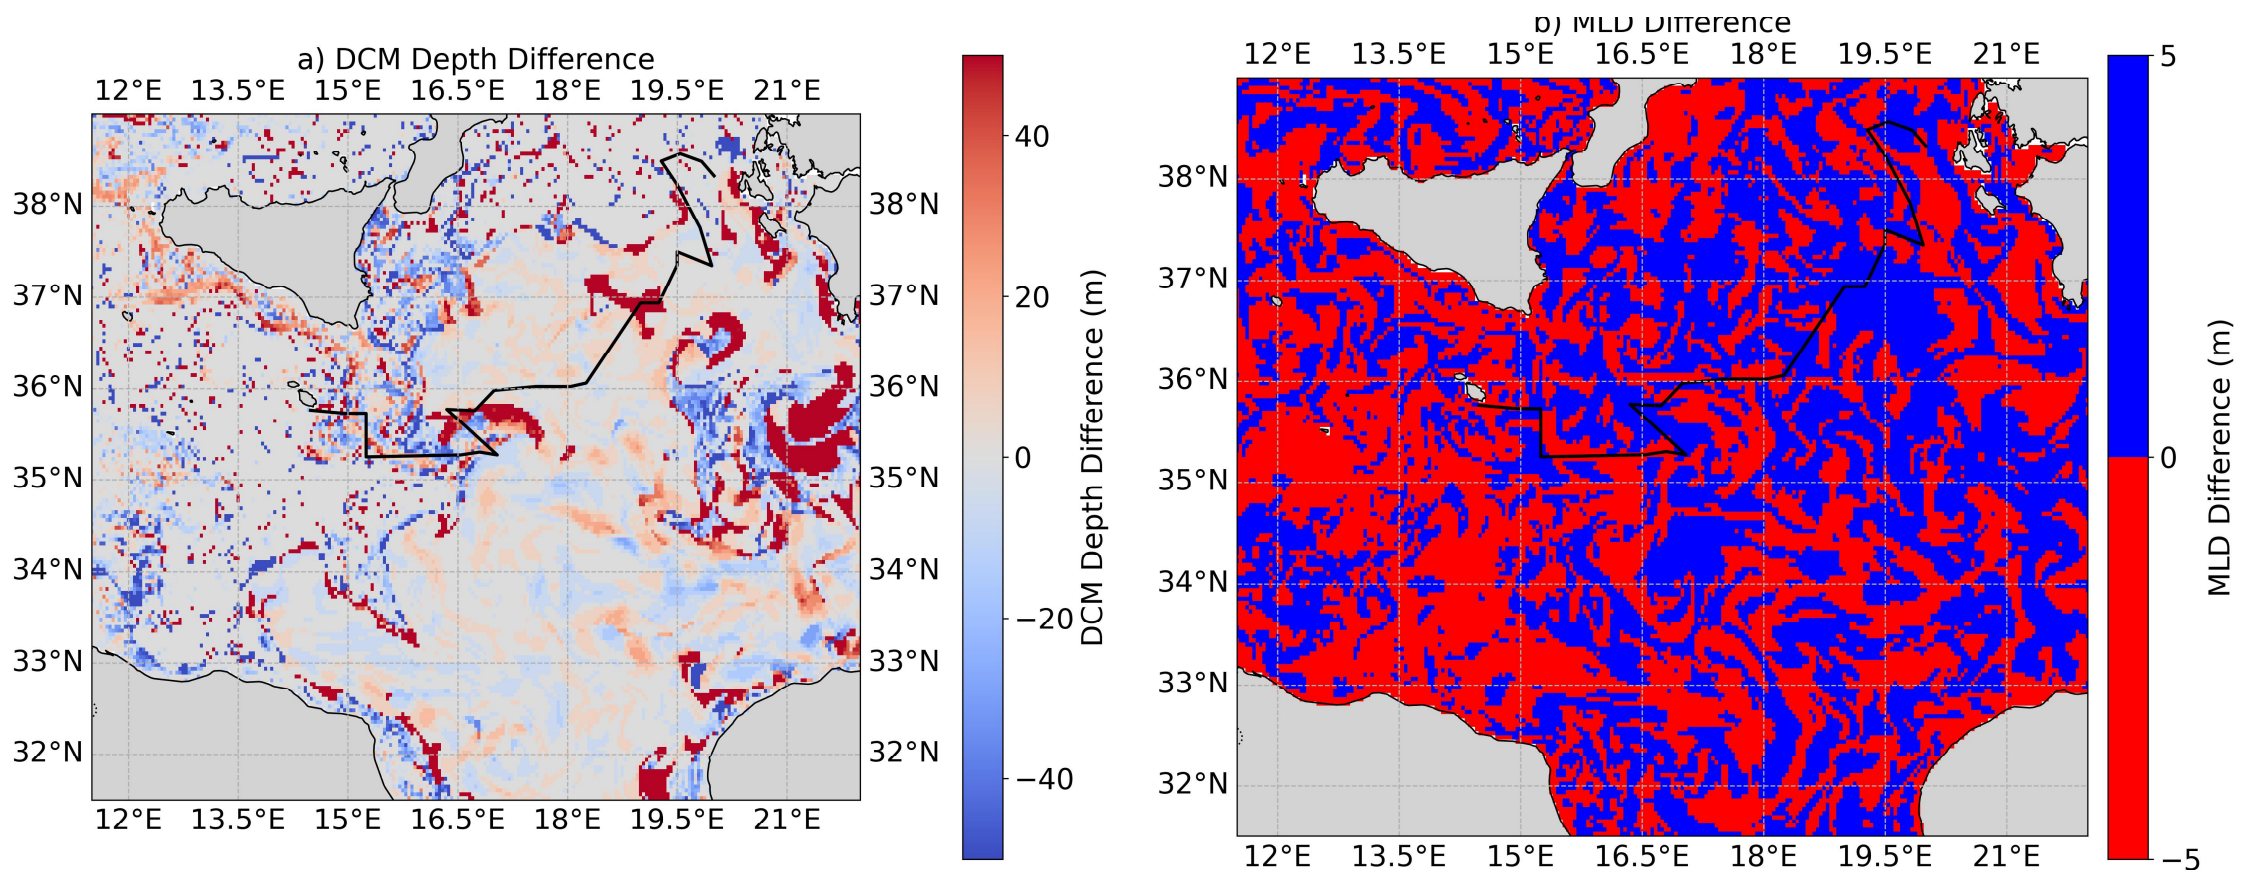

ROLF – 06-09 November 2011

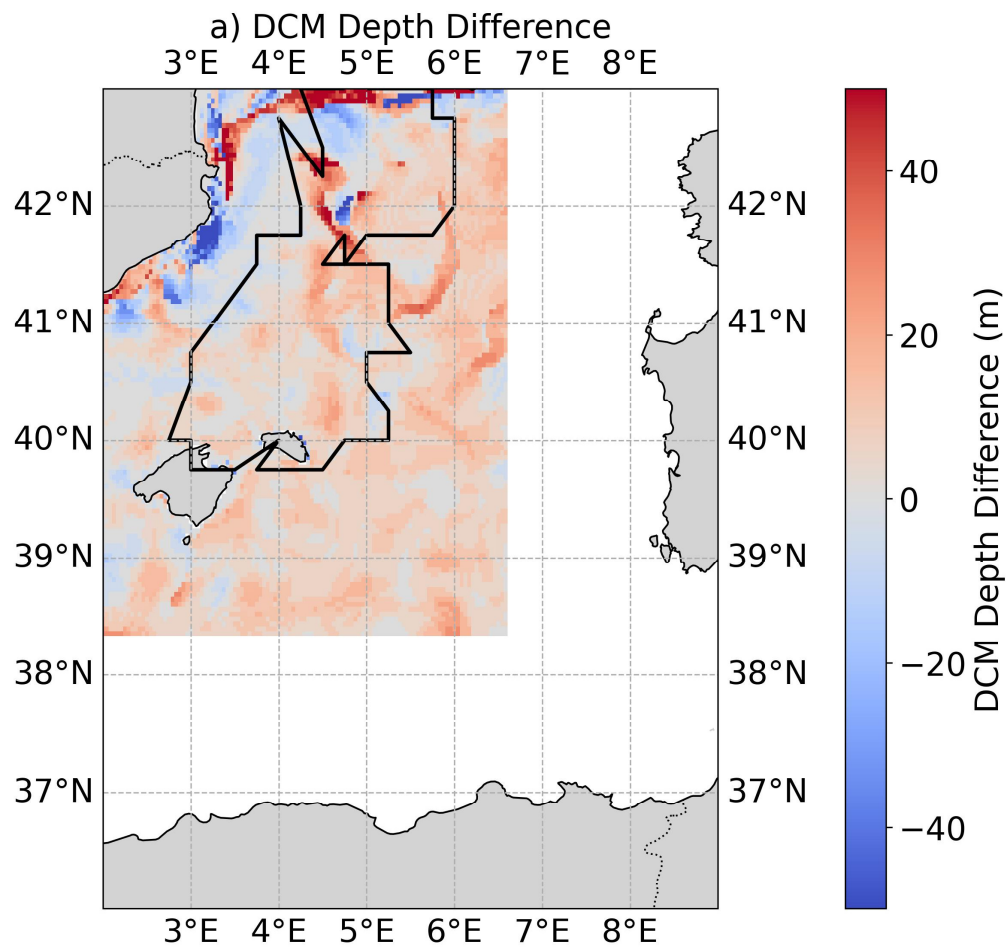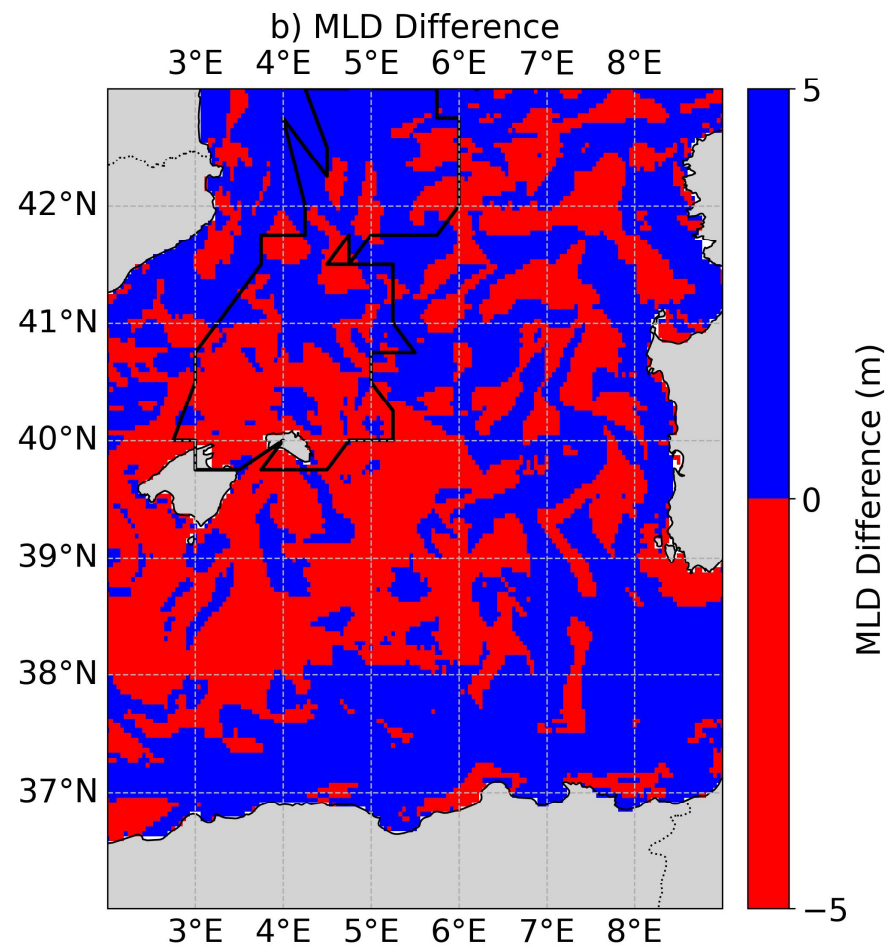

QENDRESA – 07-09 November 2014

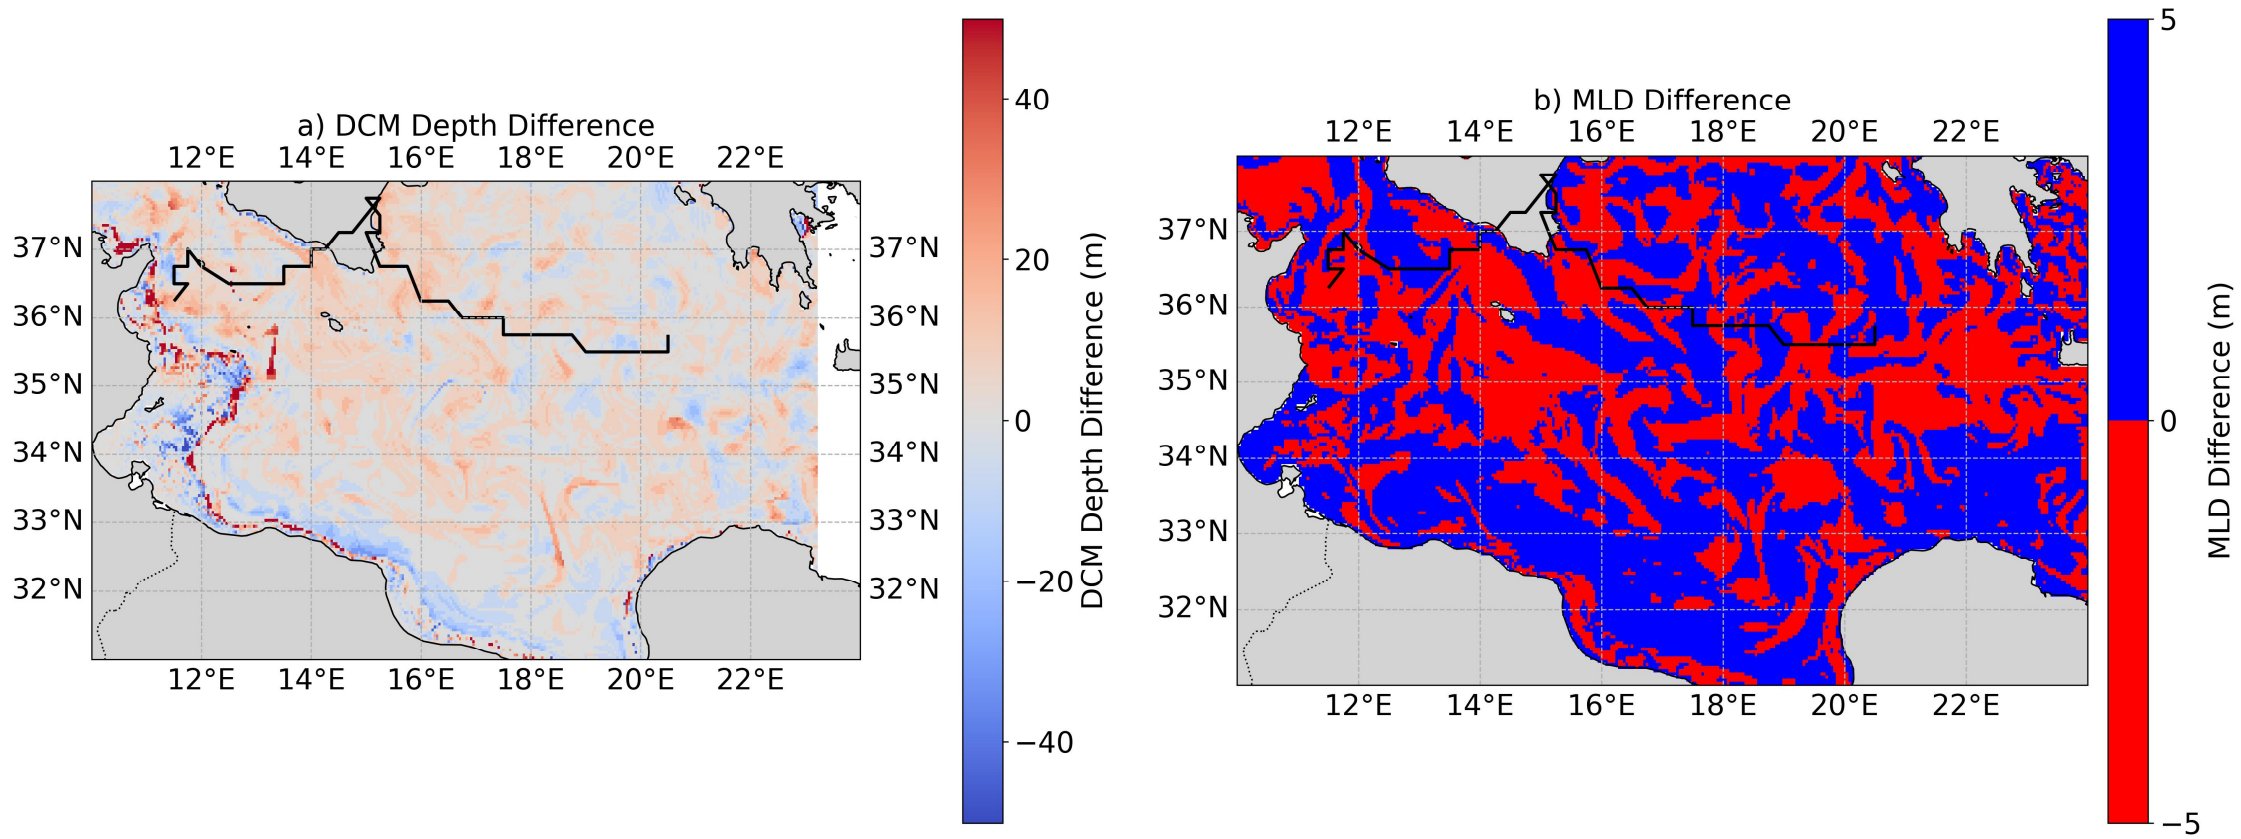

XANDRA – 01-04 December 2014

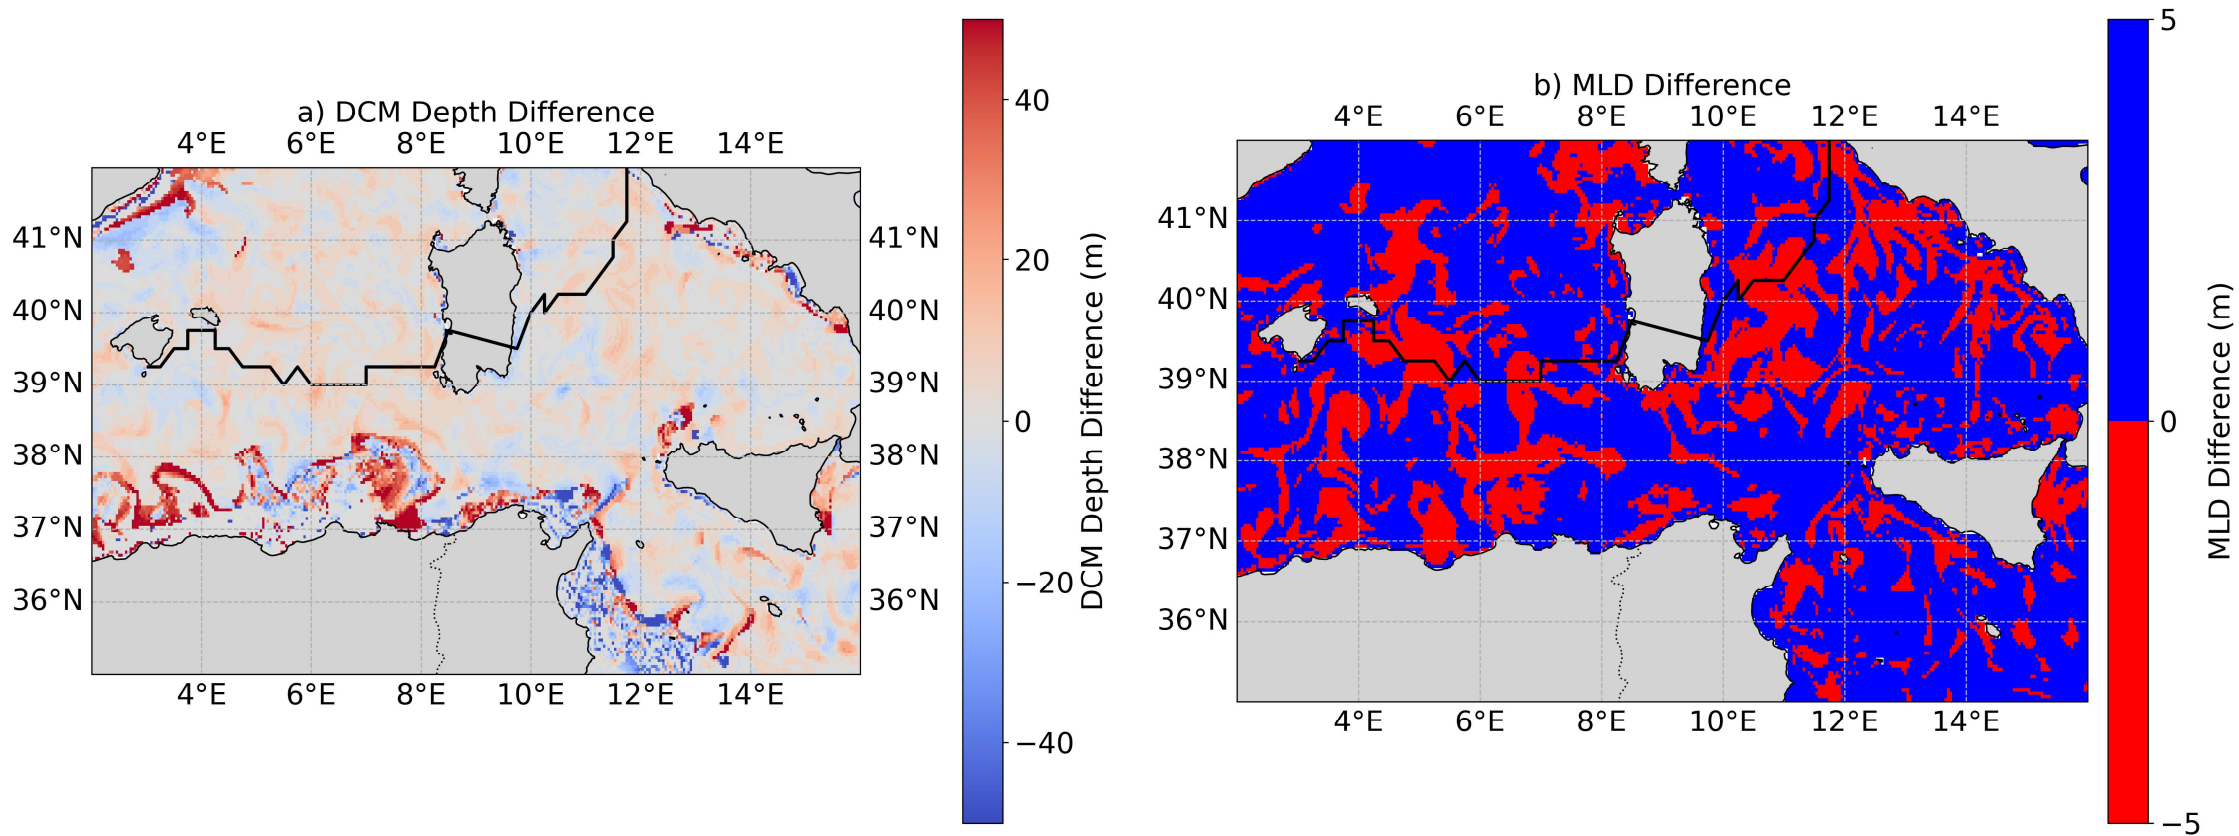

ERIK – 21-22 May 2015

a) DCM Depth Difference  
15°E16°E17°E18°E19°E20°E

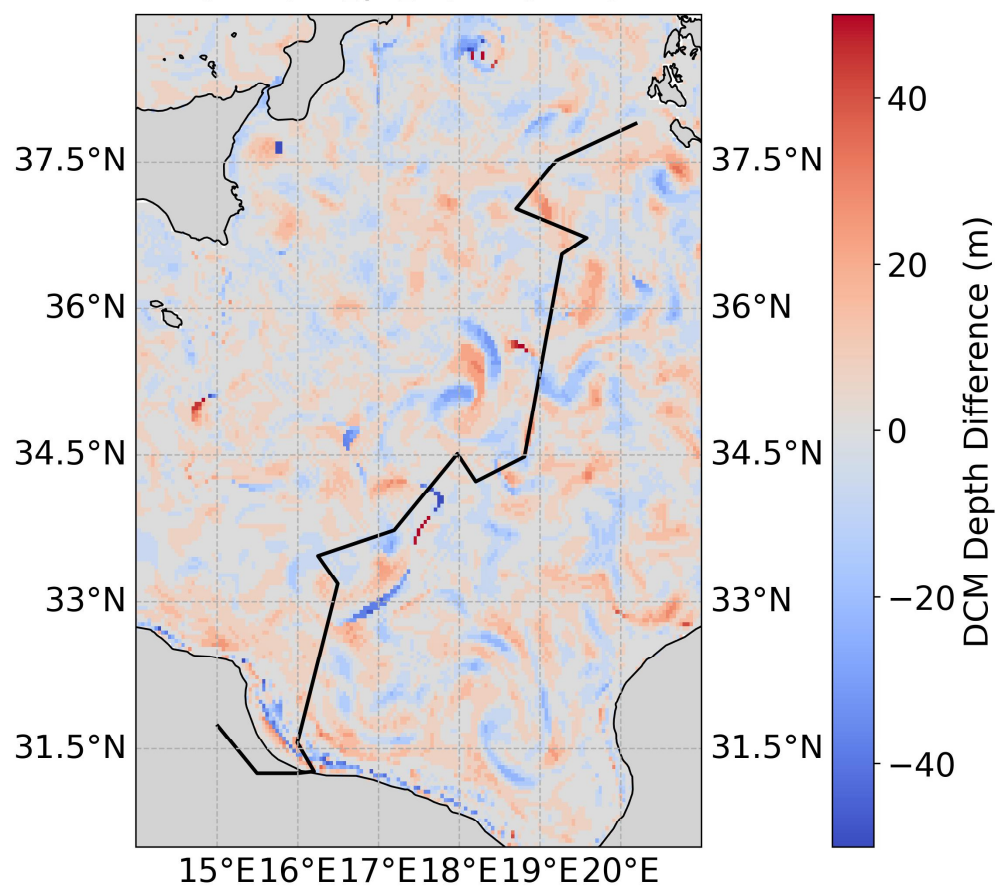

b) MLD Difference  
15°E16°E17°E18°E19°E20°E

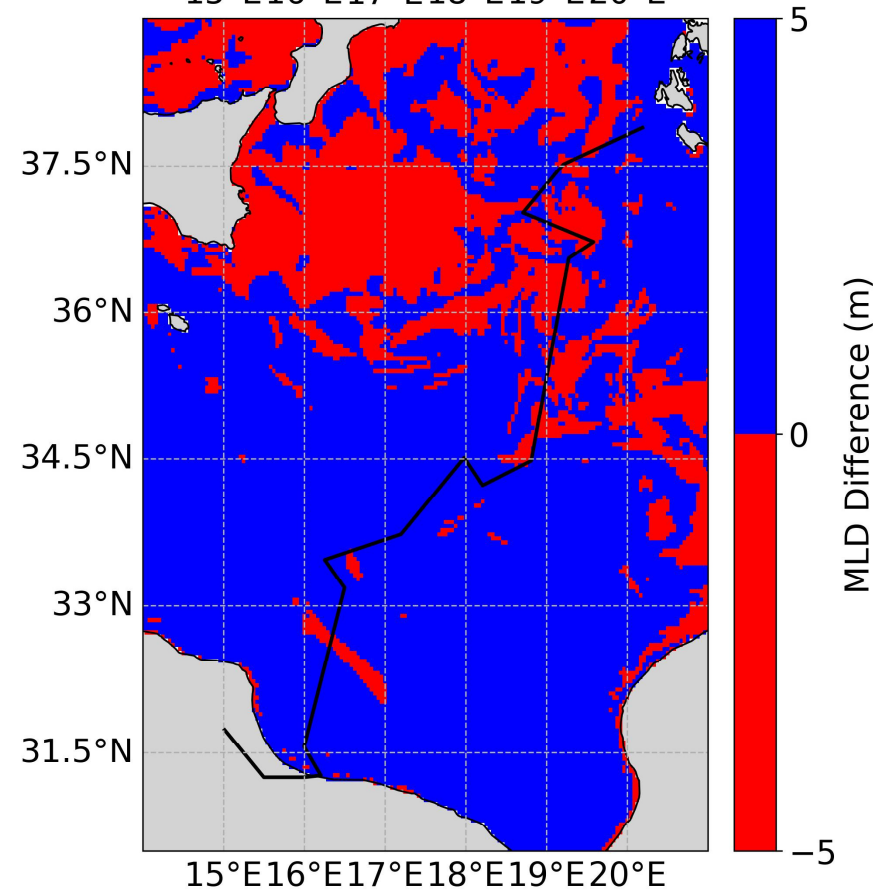

## CAULONIA – 16-17 March 2016

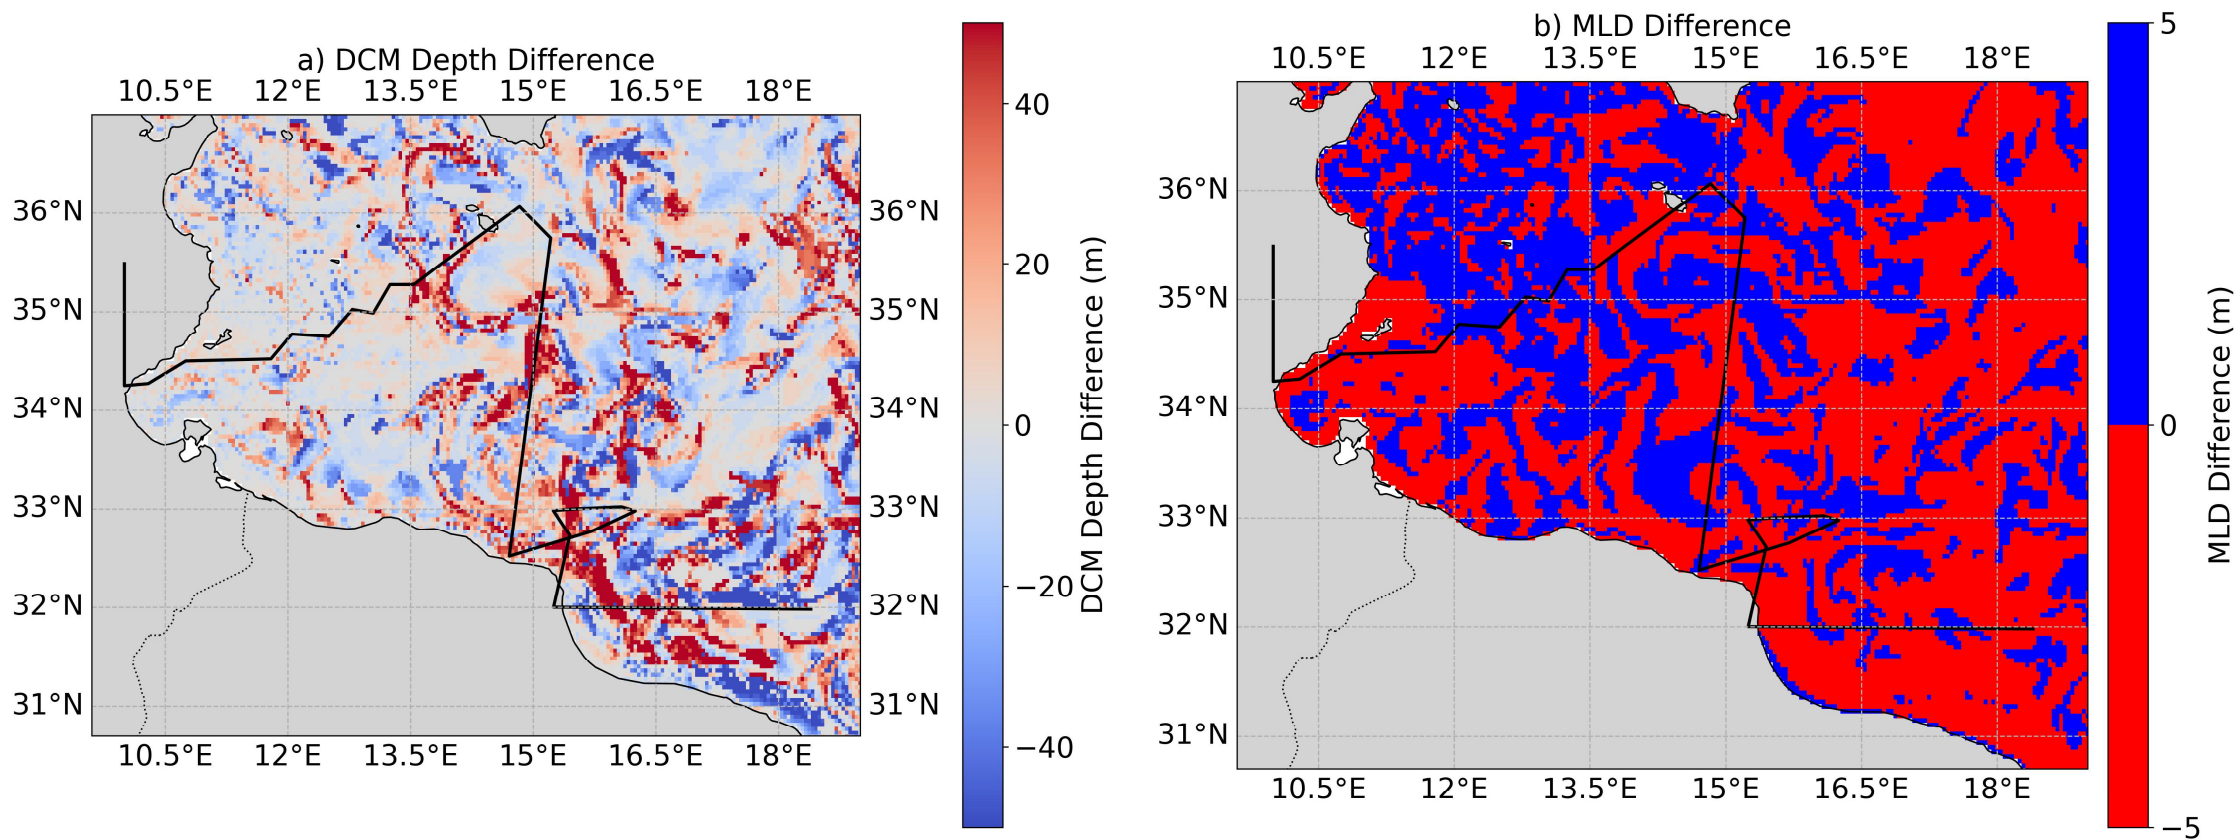

TRIXIE – 28 October-1 November 2016

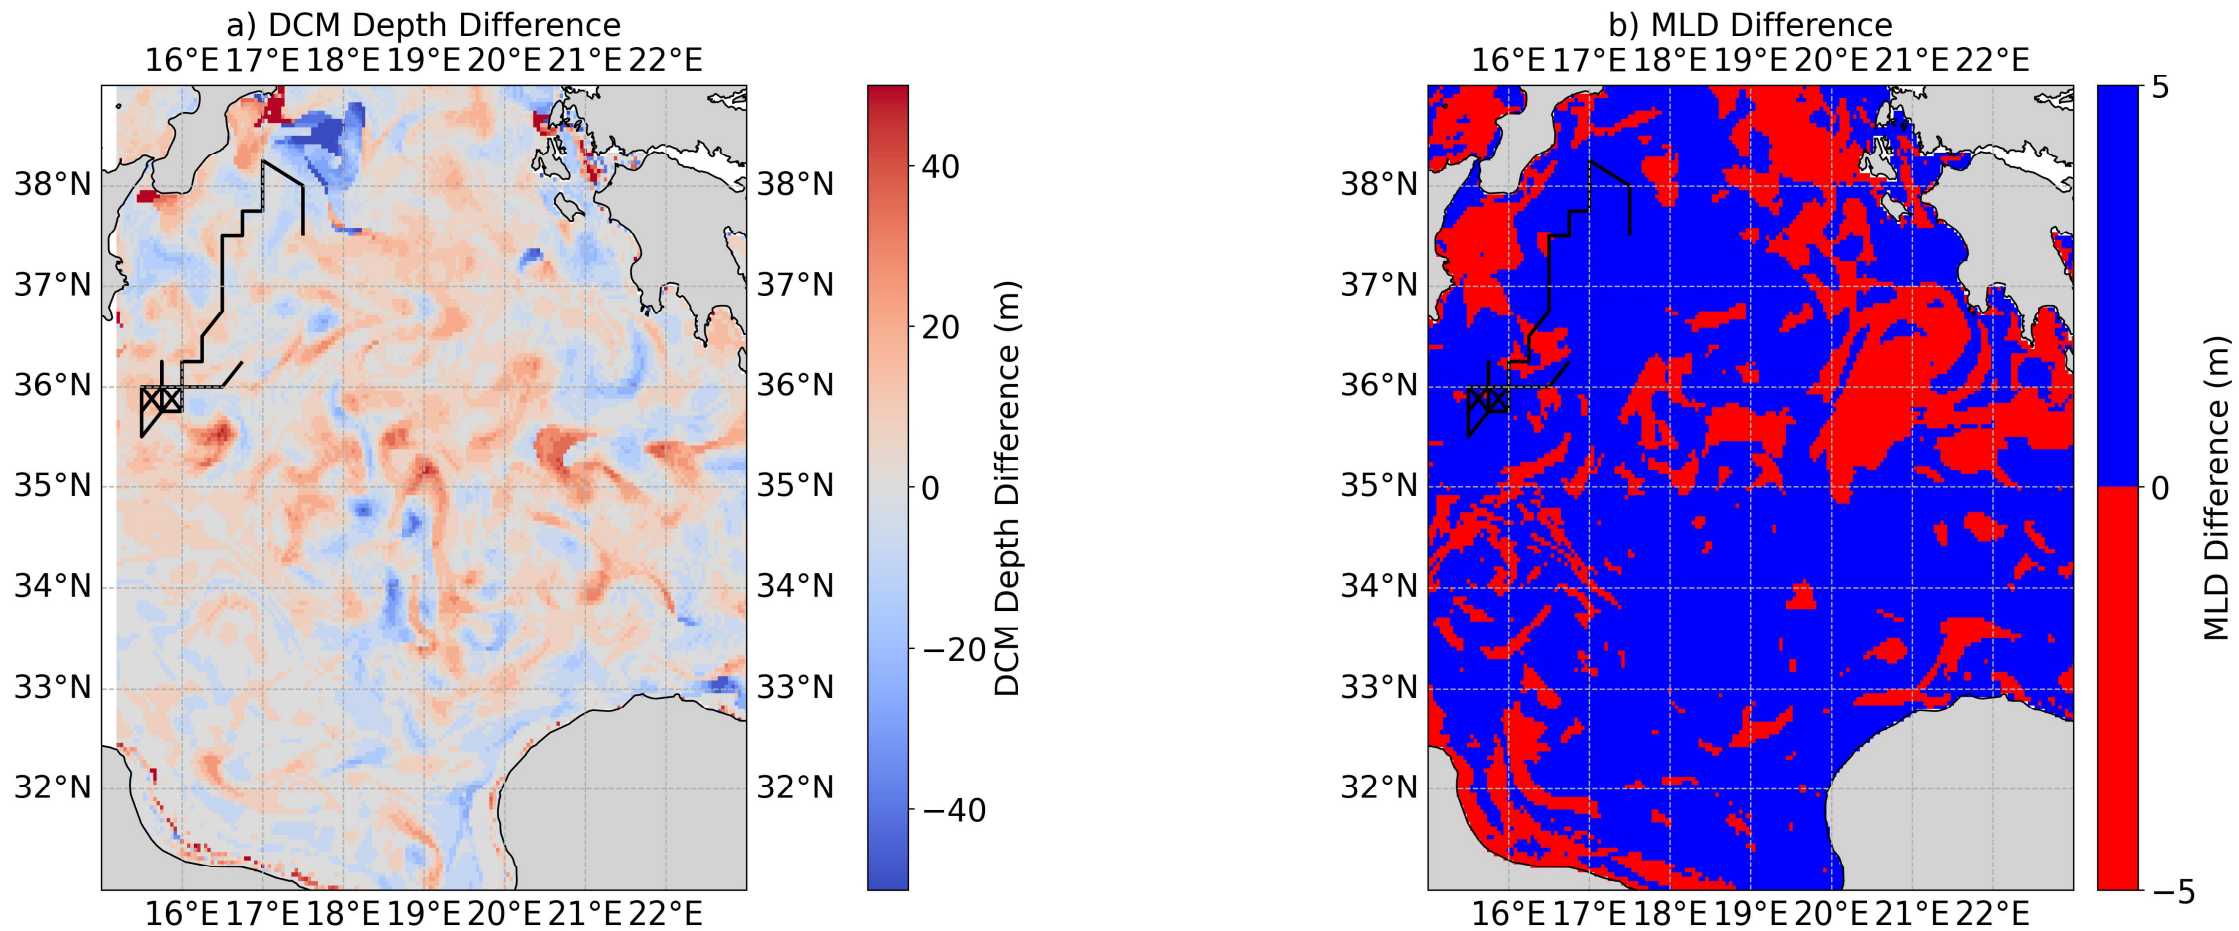

## NUMA – 15-19 November 2017

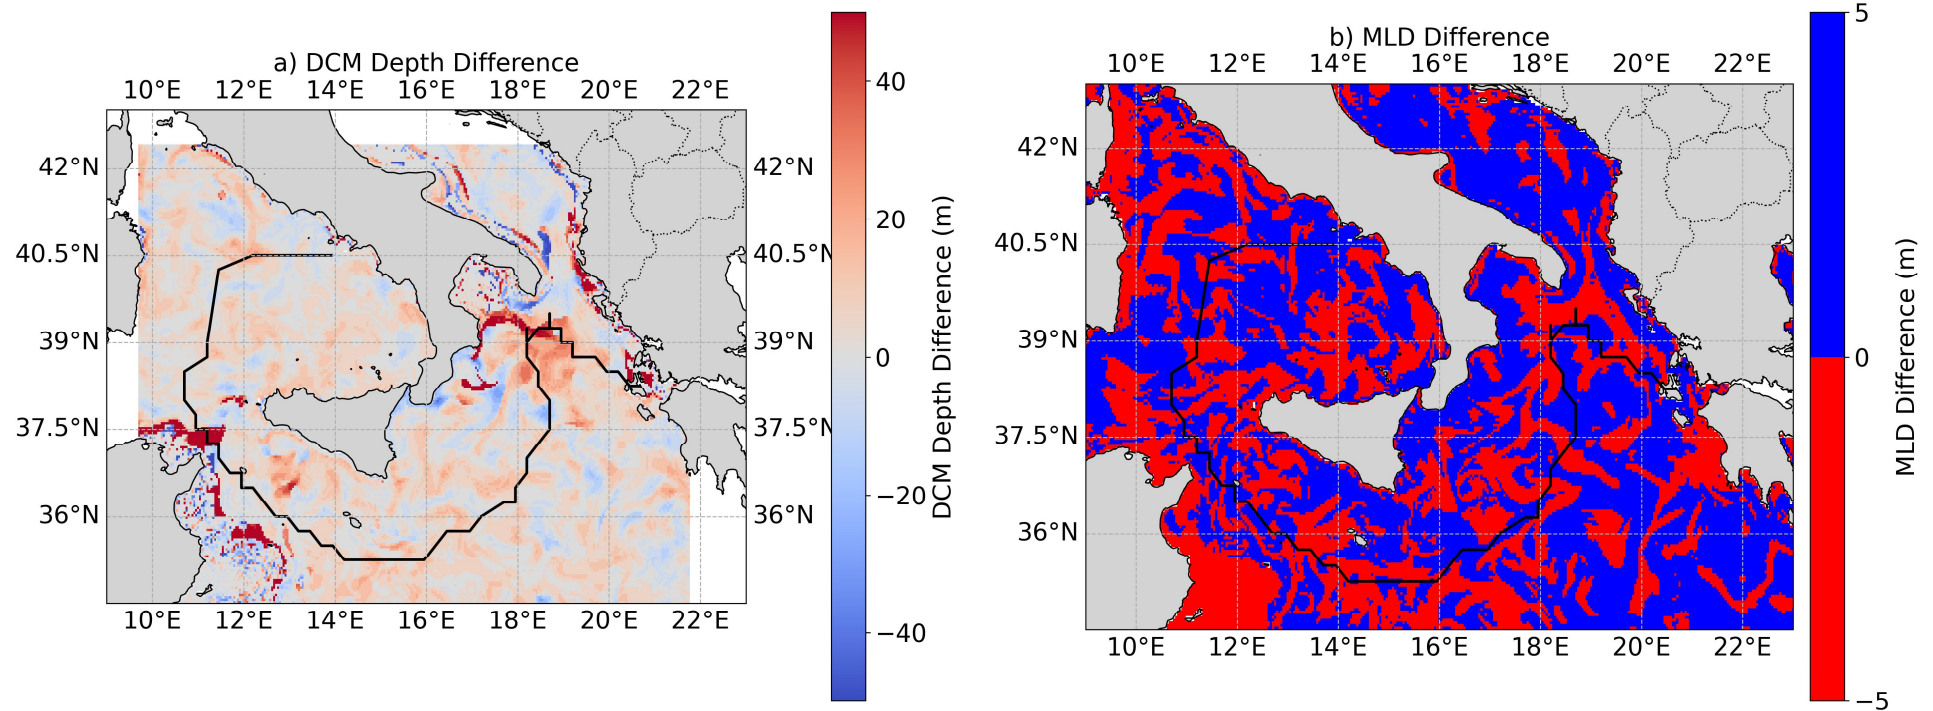

ZORBAS – 27-29 September 2018

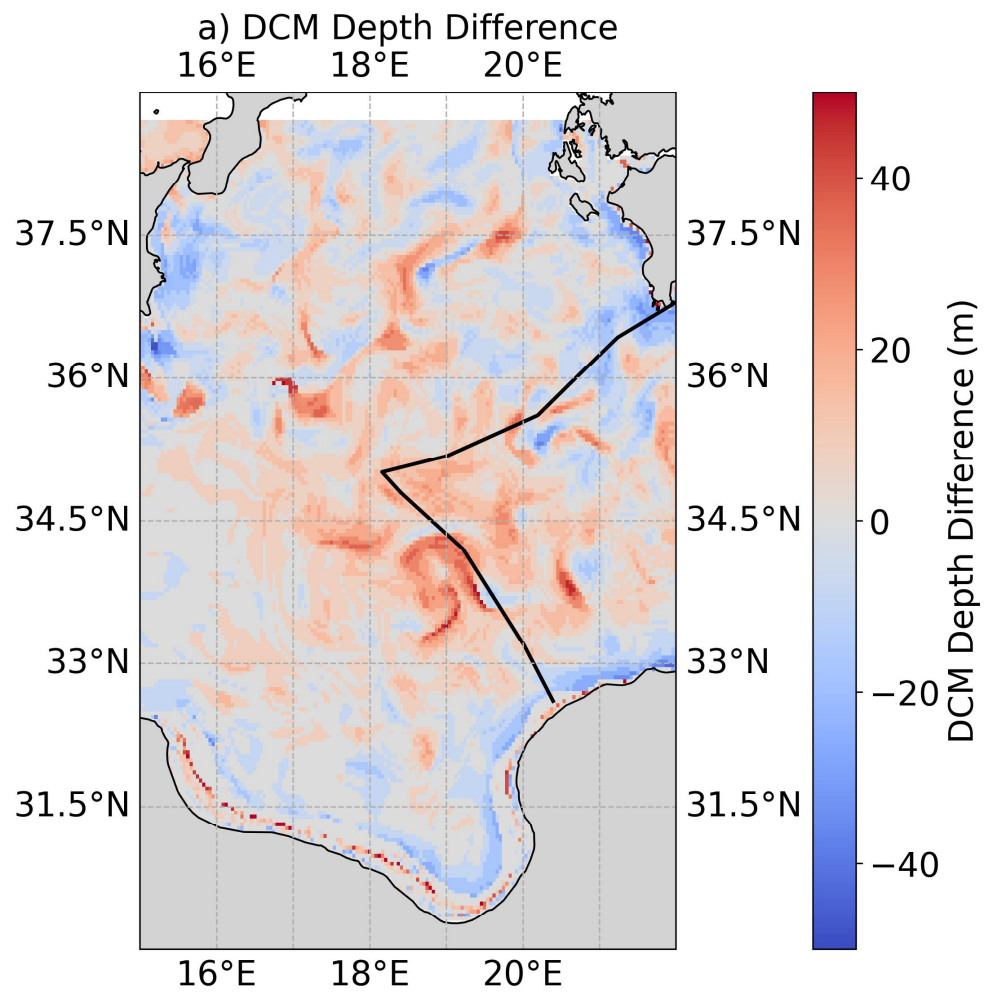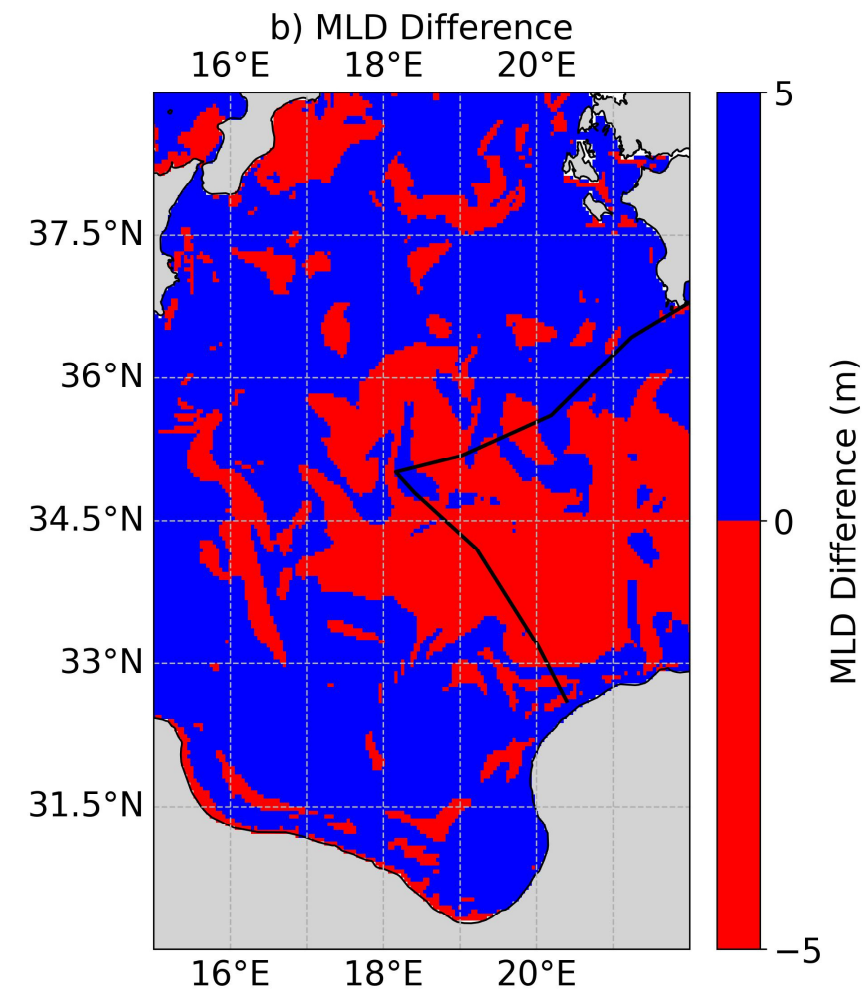

VAIA – 27-29 October 2018

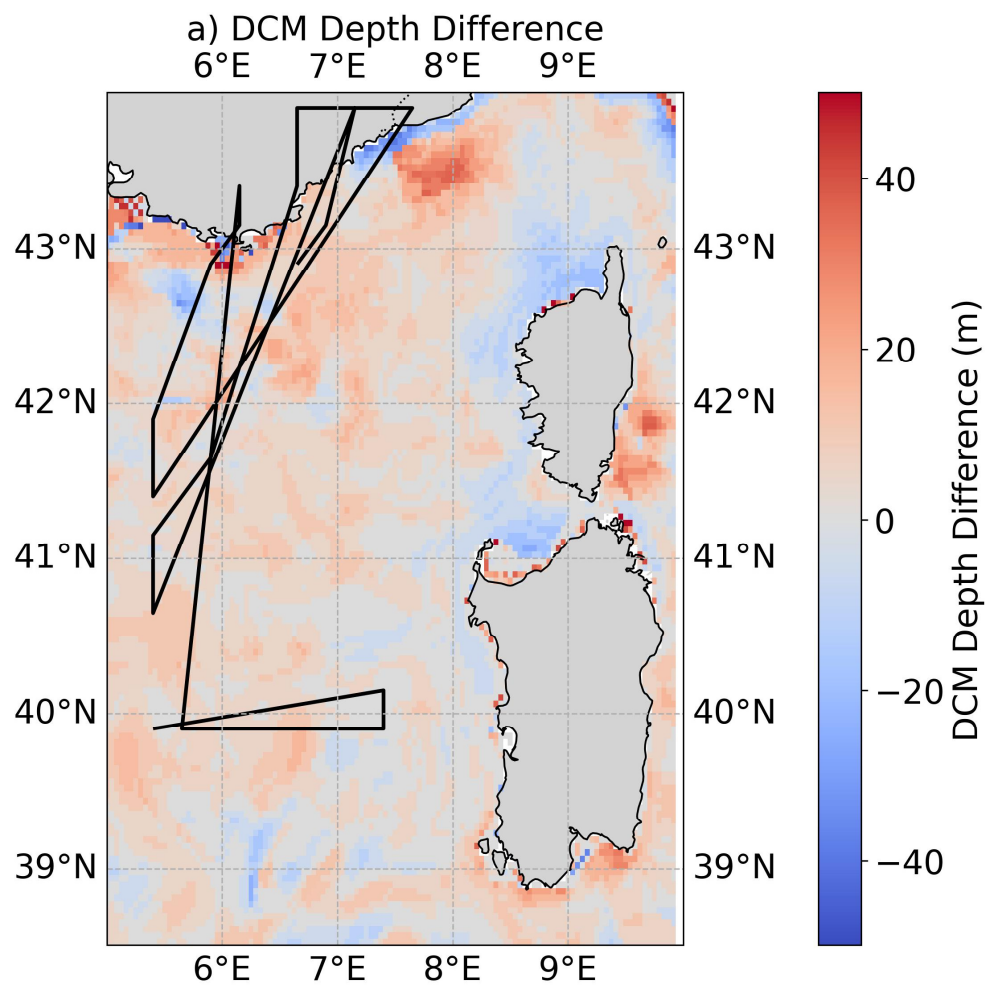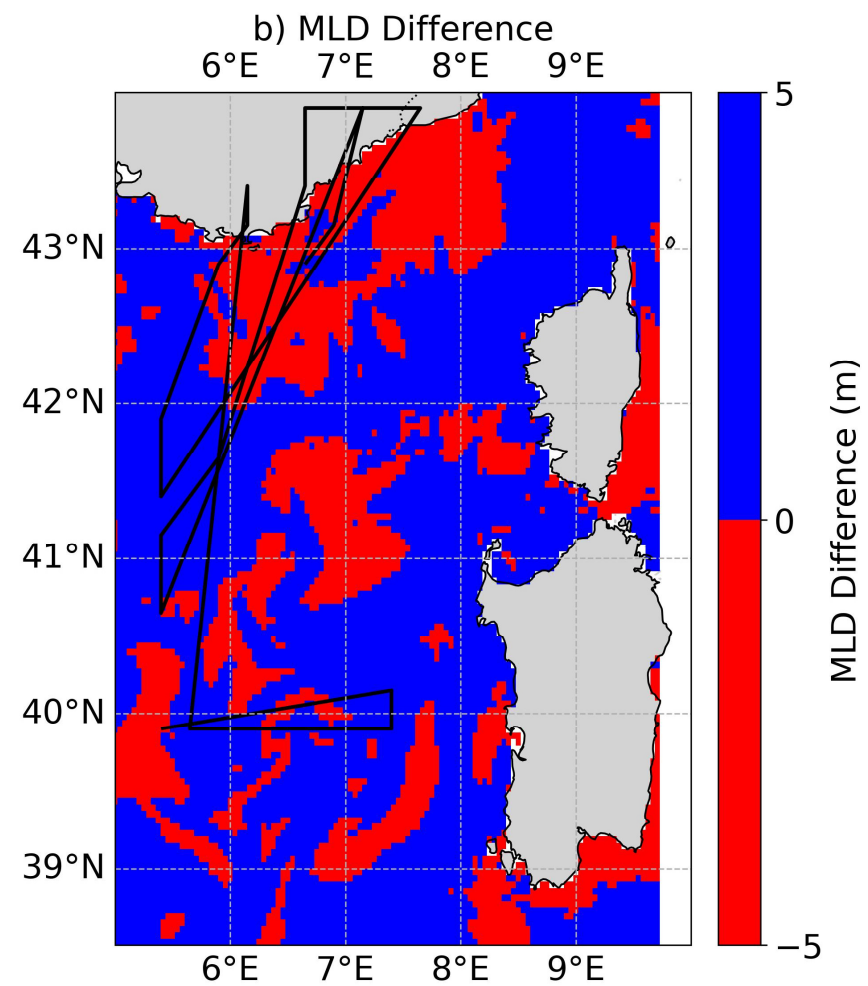

TRUDY – 11-13 November 2019

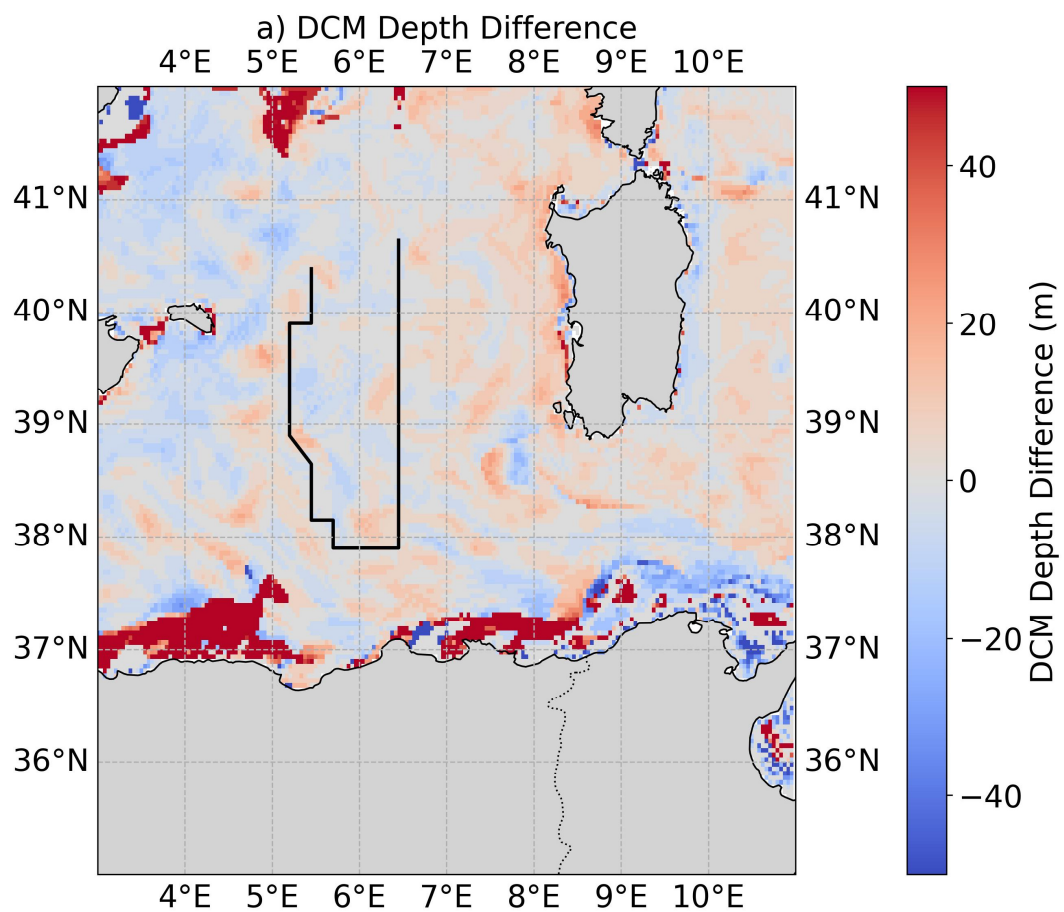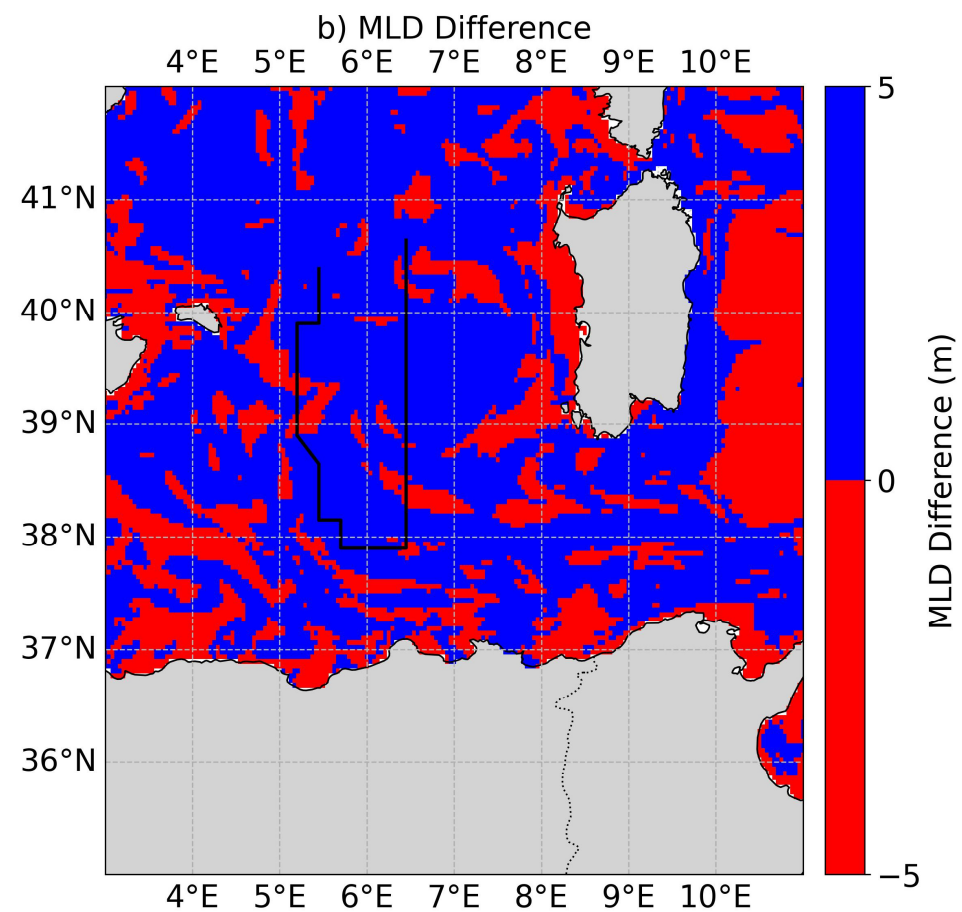

IANOS – 15-20 September 2020

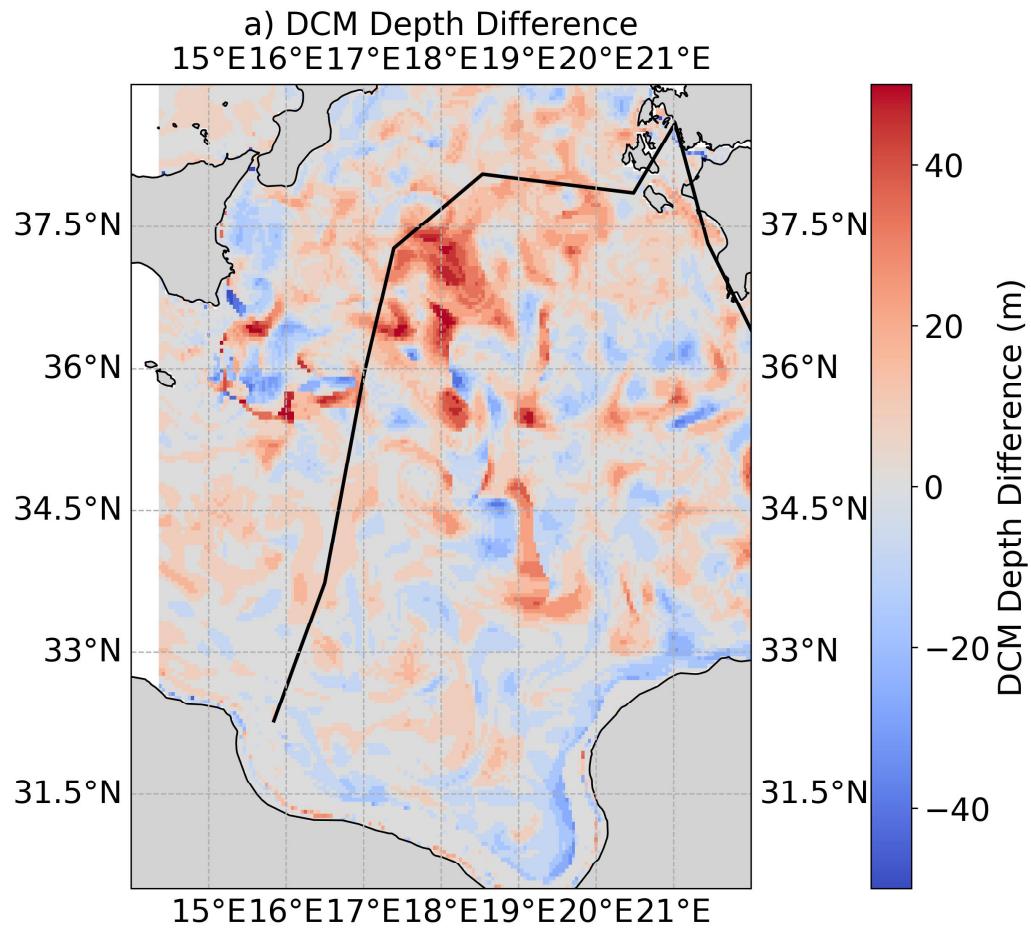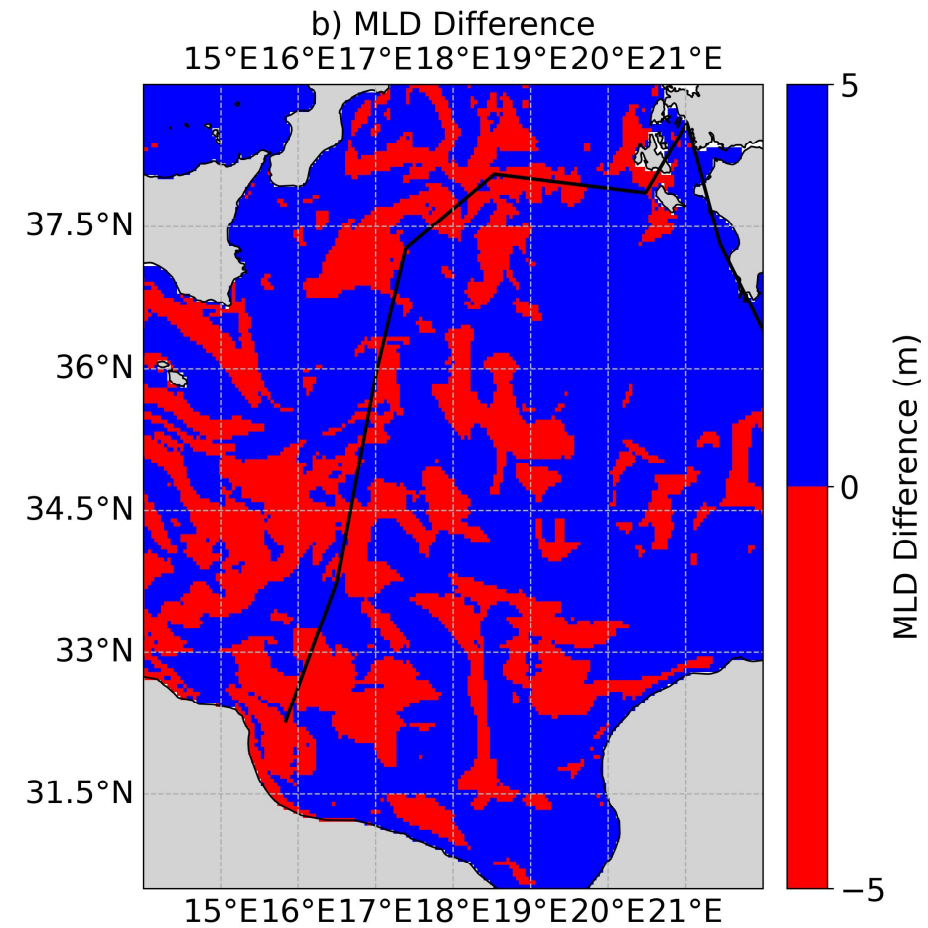

## APOLLO – 25 October- 01 November 2021

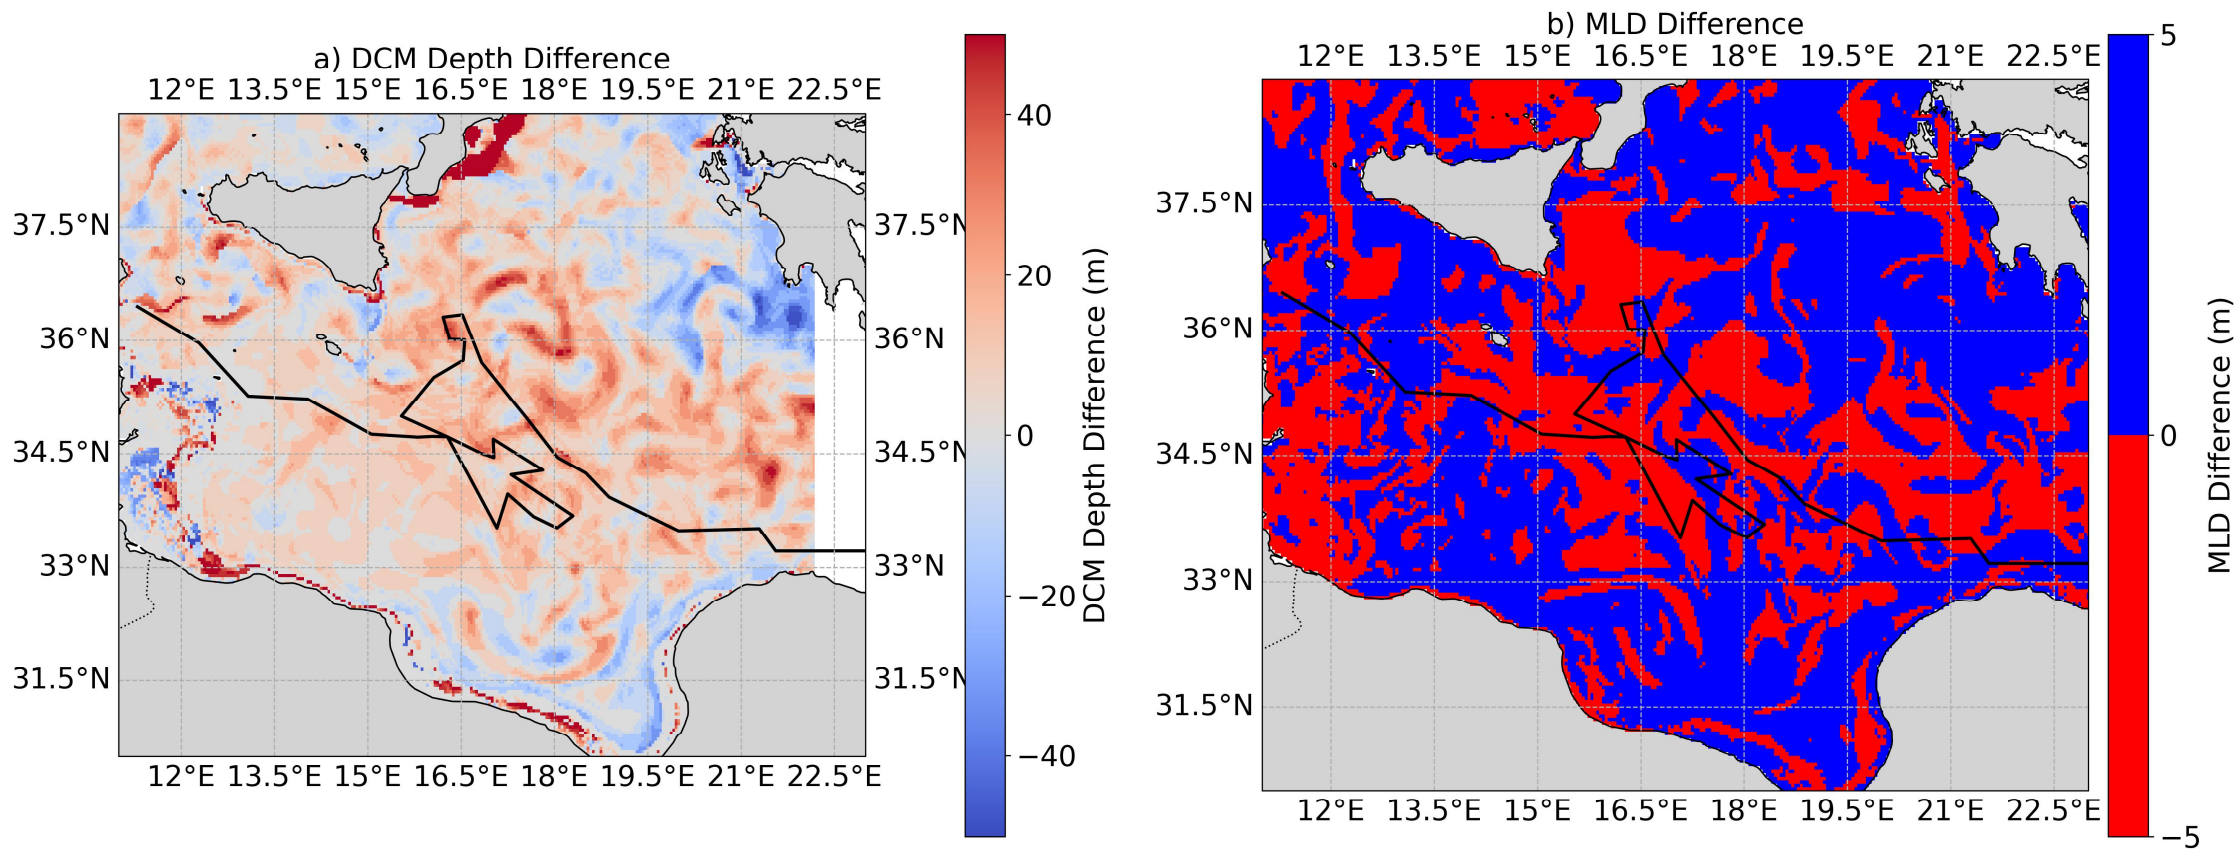

## BLAS – November 2021

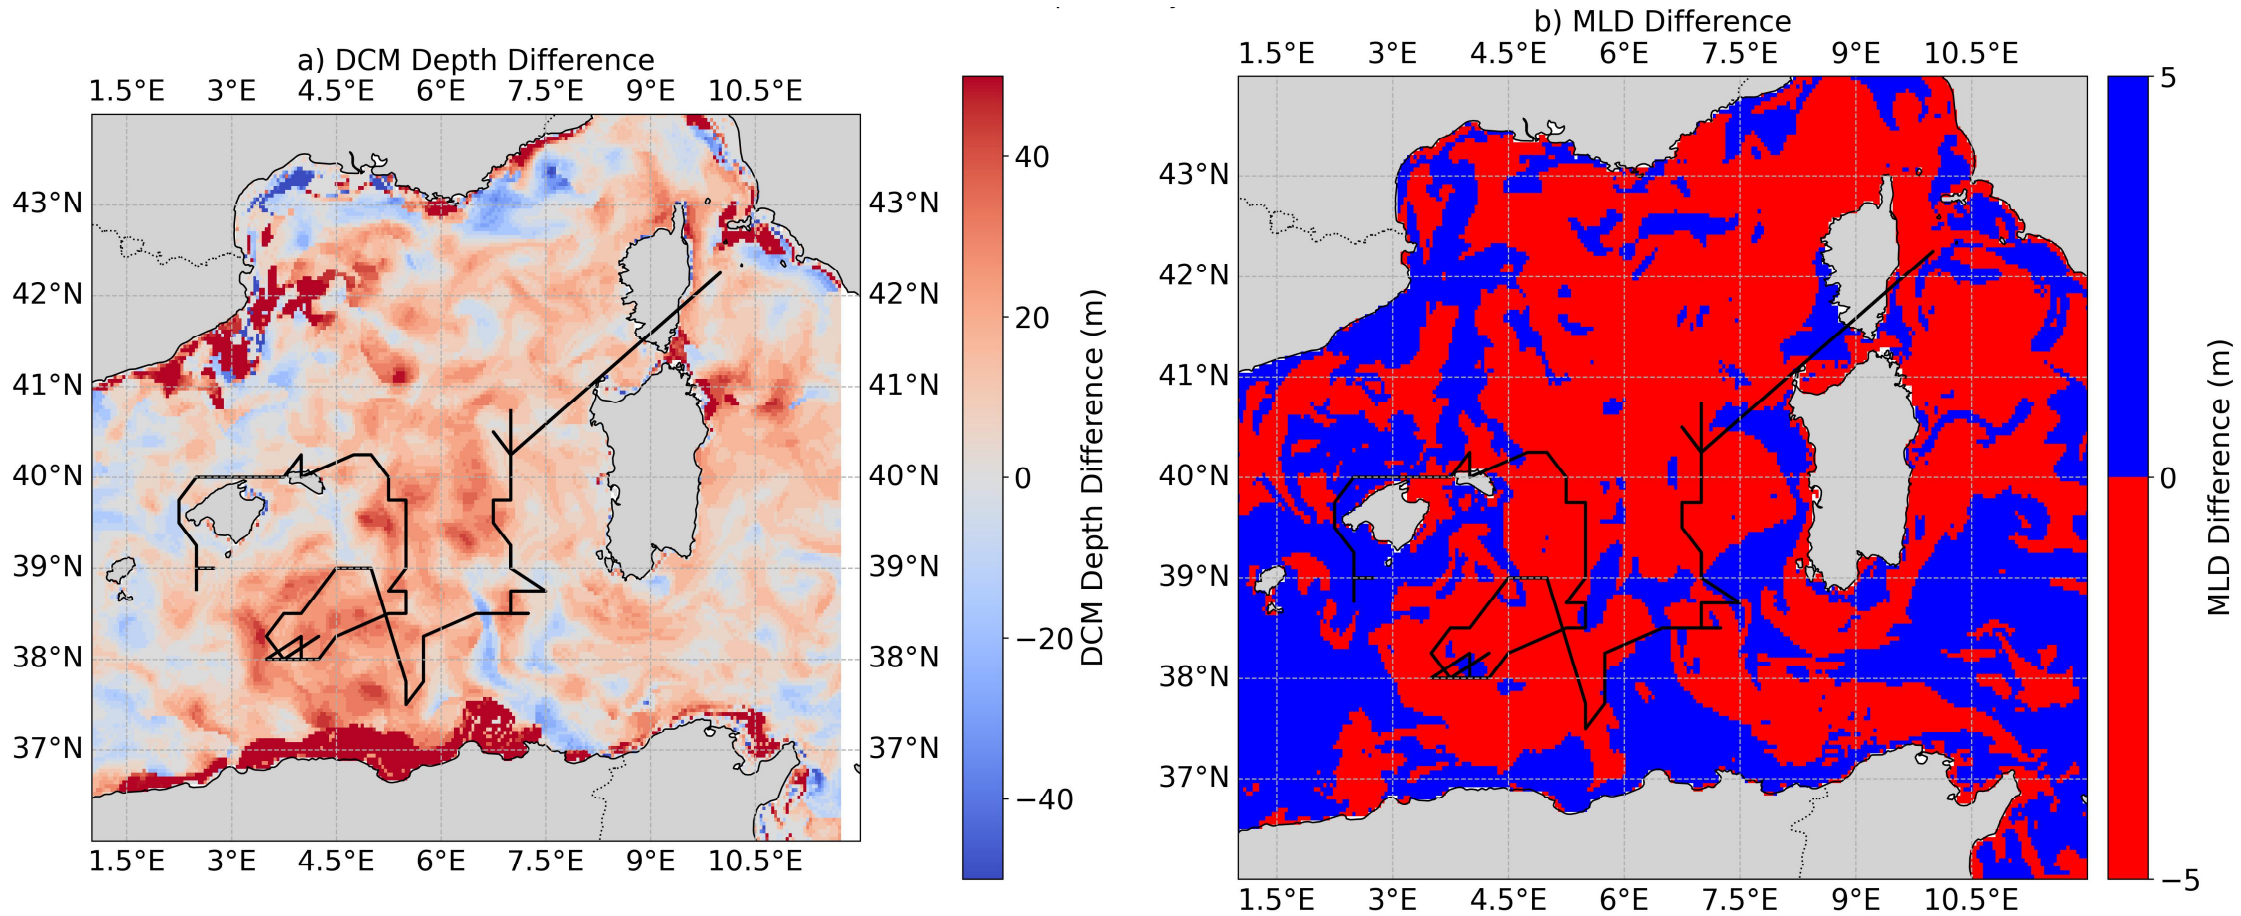

## CIPRIAN – October 2022

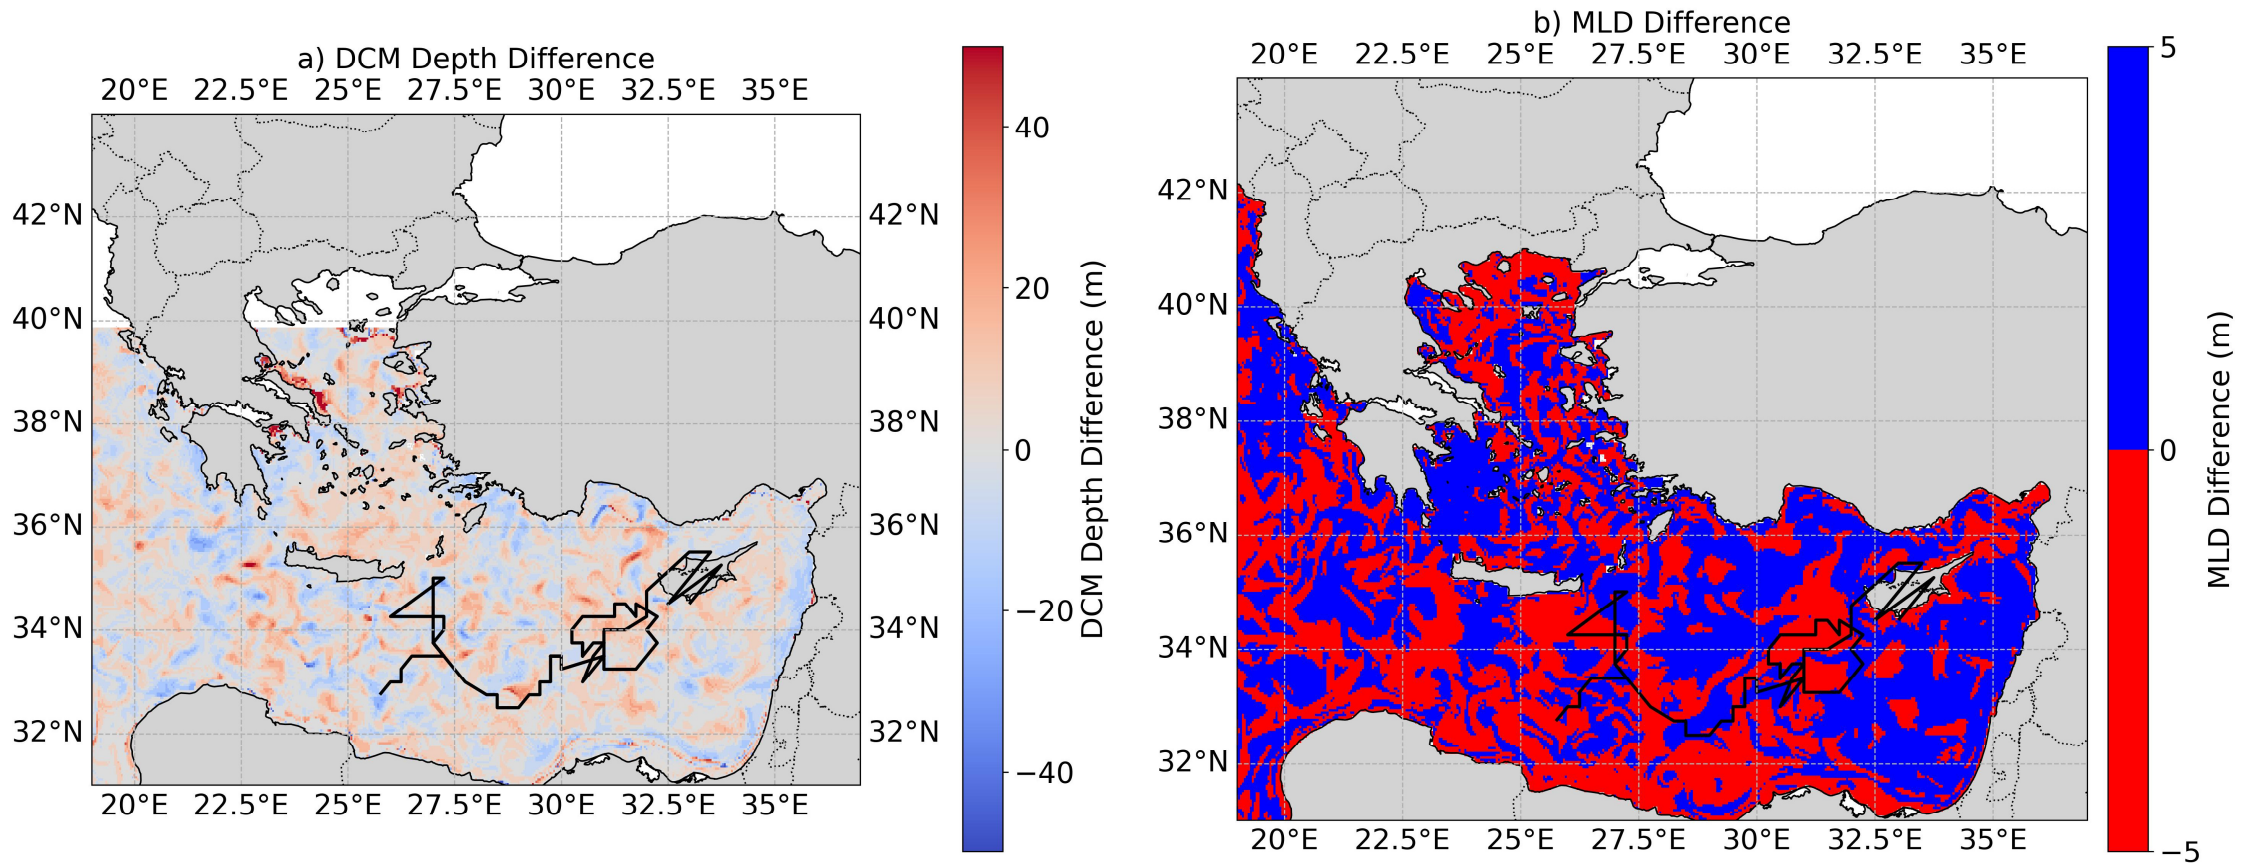

# HELIOS – 06-12 February 2023

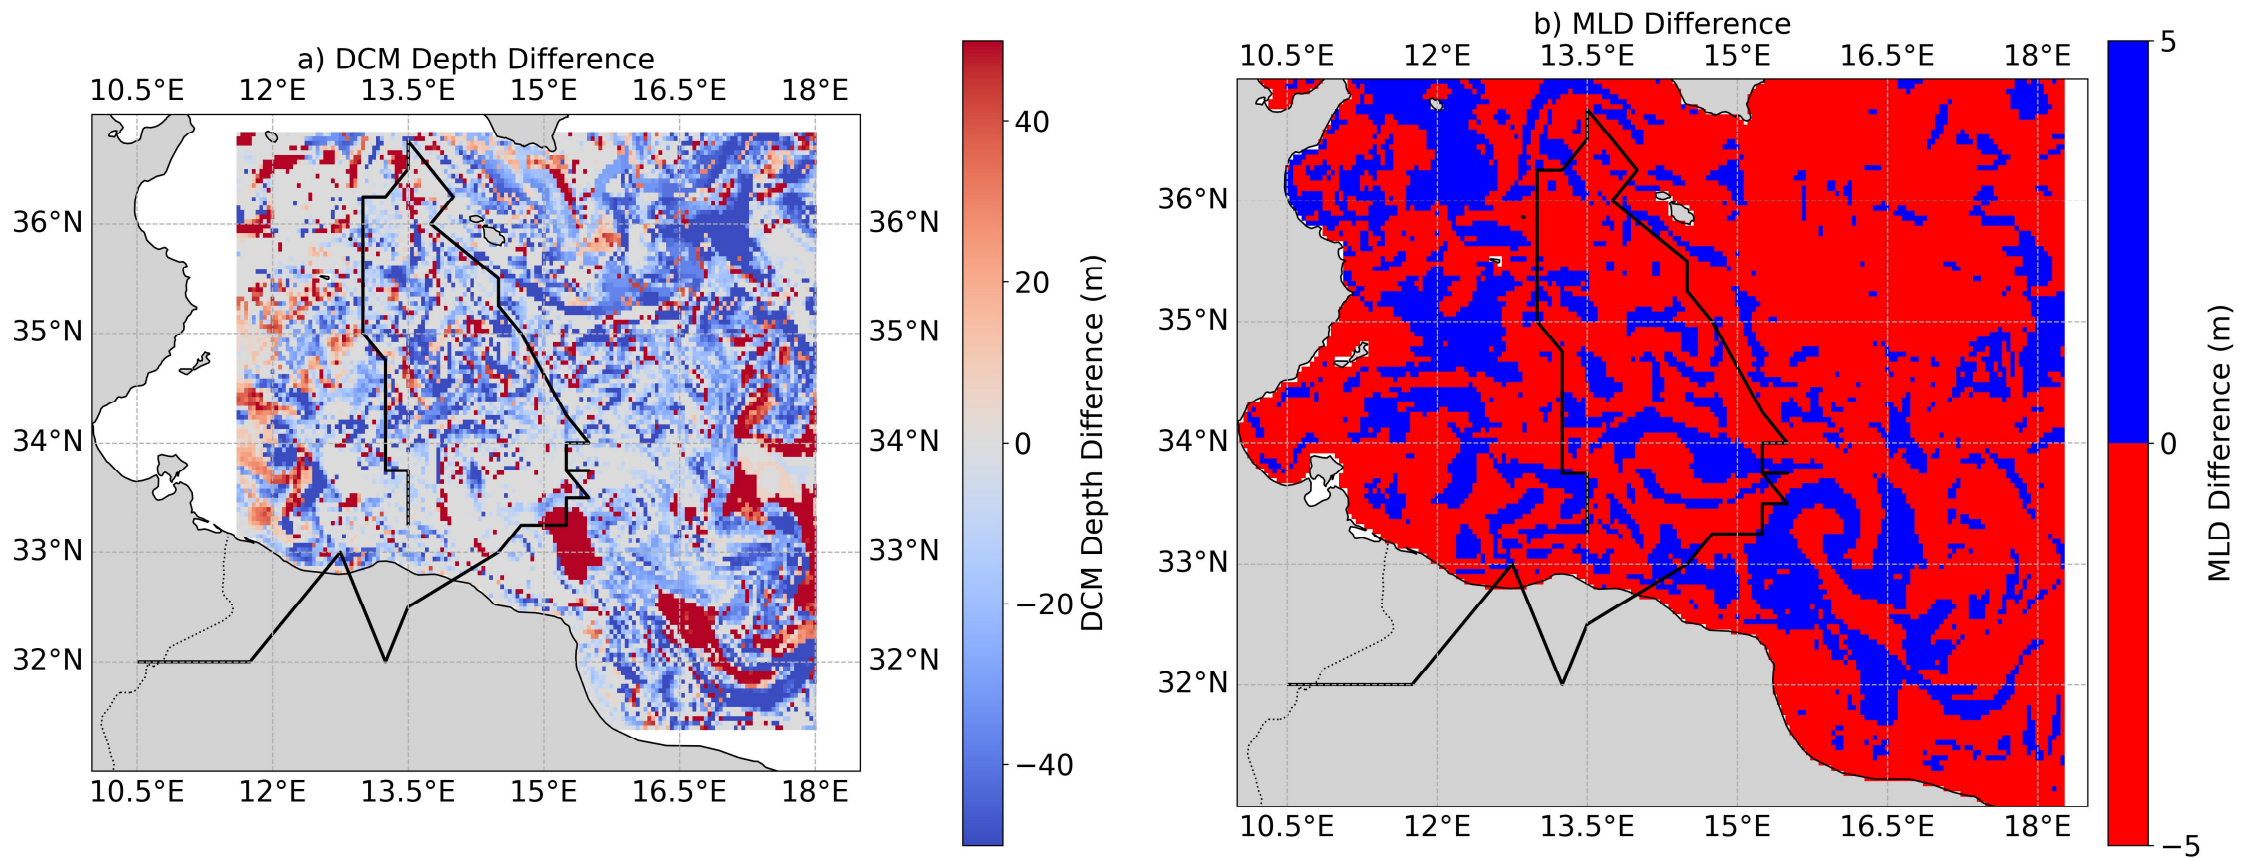

JULIETTE – 28 February- 02 March 2023

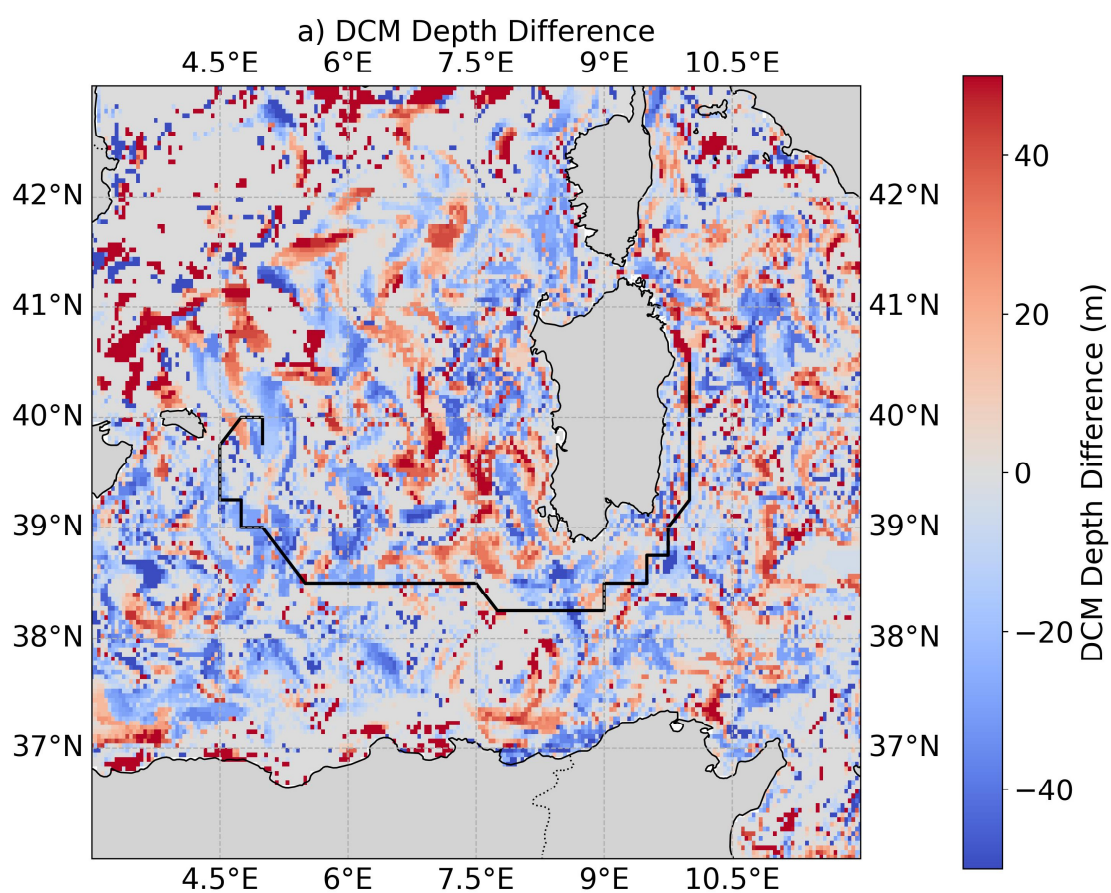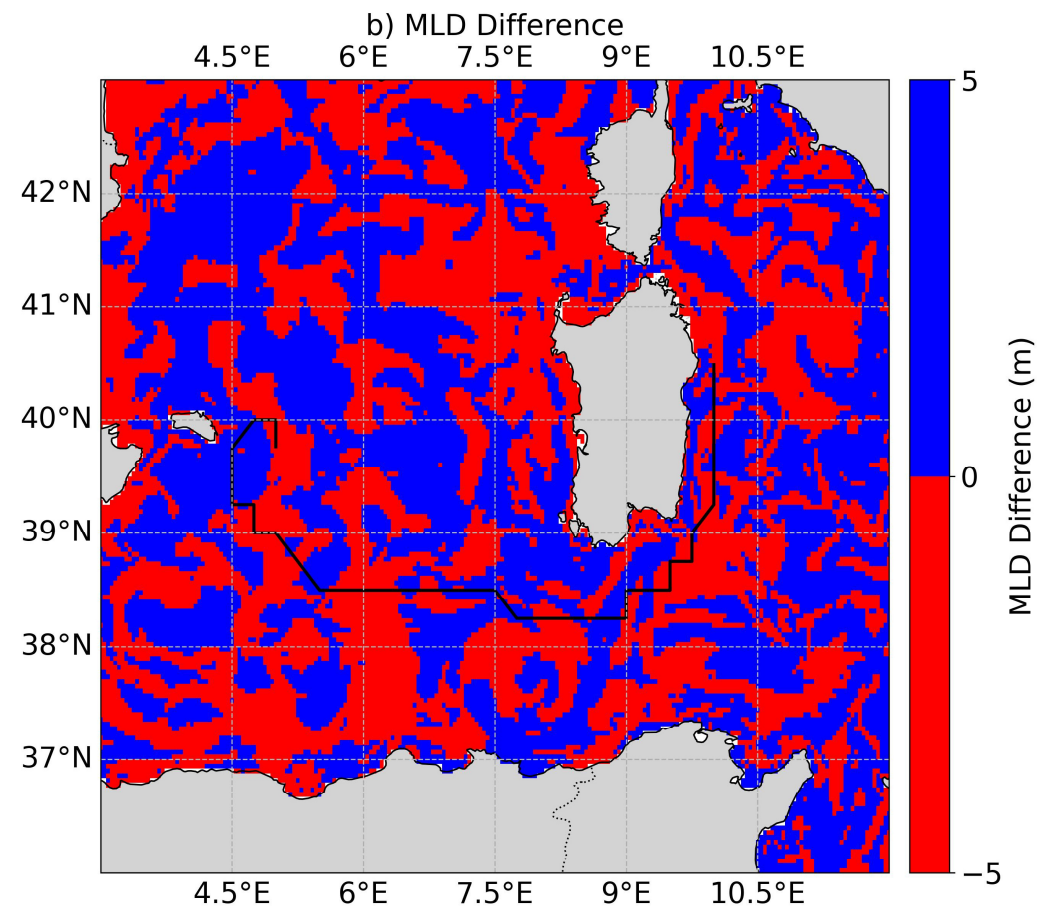

DANIEL – 06-12 September 2023

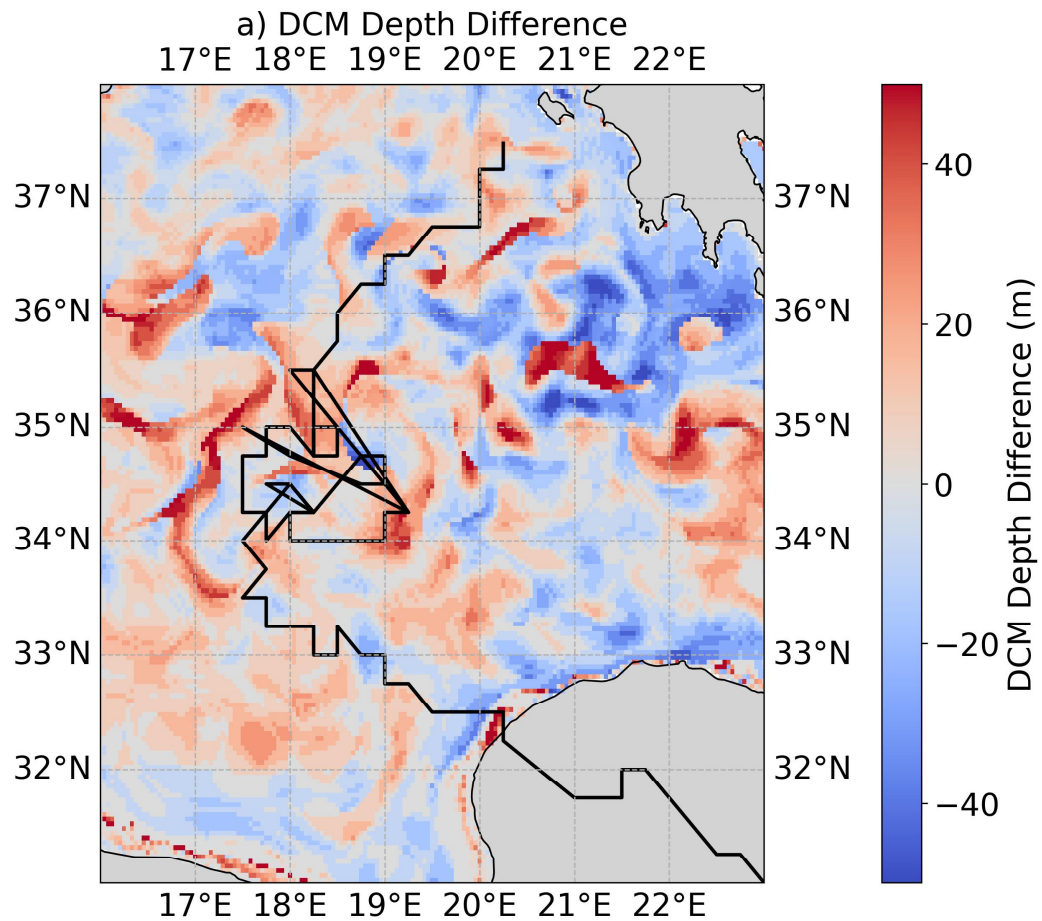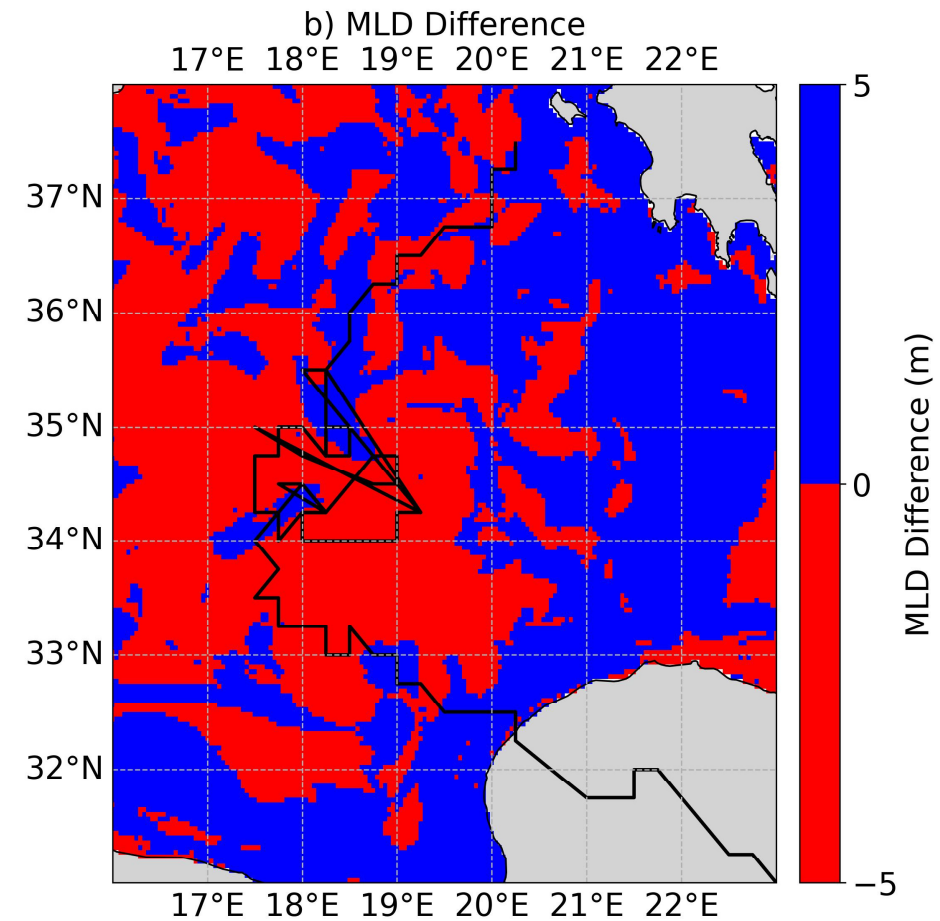

Supplement: Supplementary file 4 [file Supplementary Material S4_DCM_MLD.pdf › Supplementary Material S4_DCM_MLD.pdf]
