# Supplementary material for: When Storms Stir the Mediterranean Depths: Chlorophyll-a Response to Mediterranean Hurricanes
Source: Copernicus journal article supplement (doi:10.5194/egusphere-2025-3260), 2025-07-18

# ZEO – December 2005

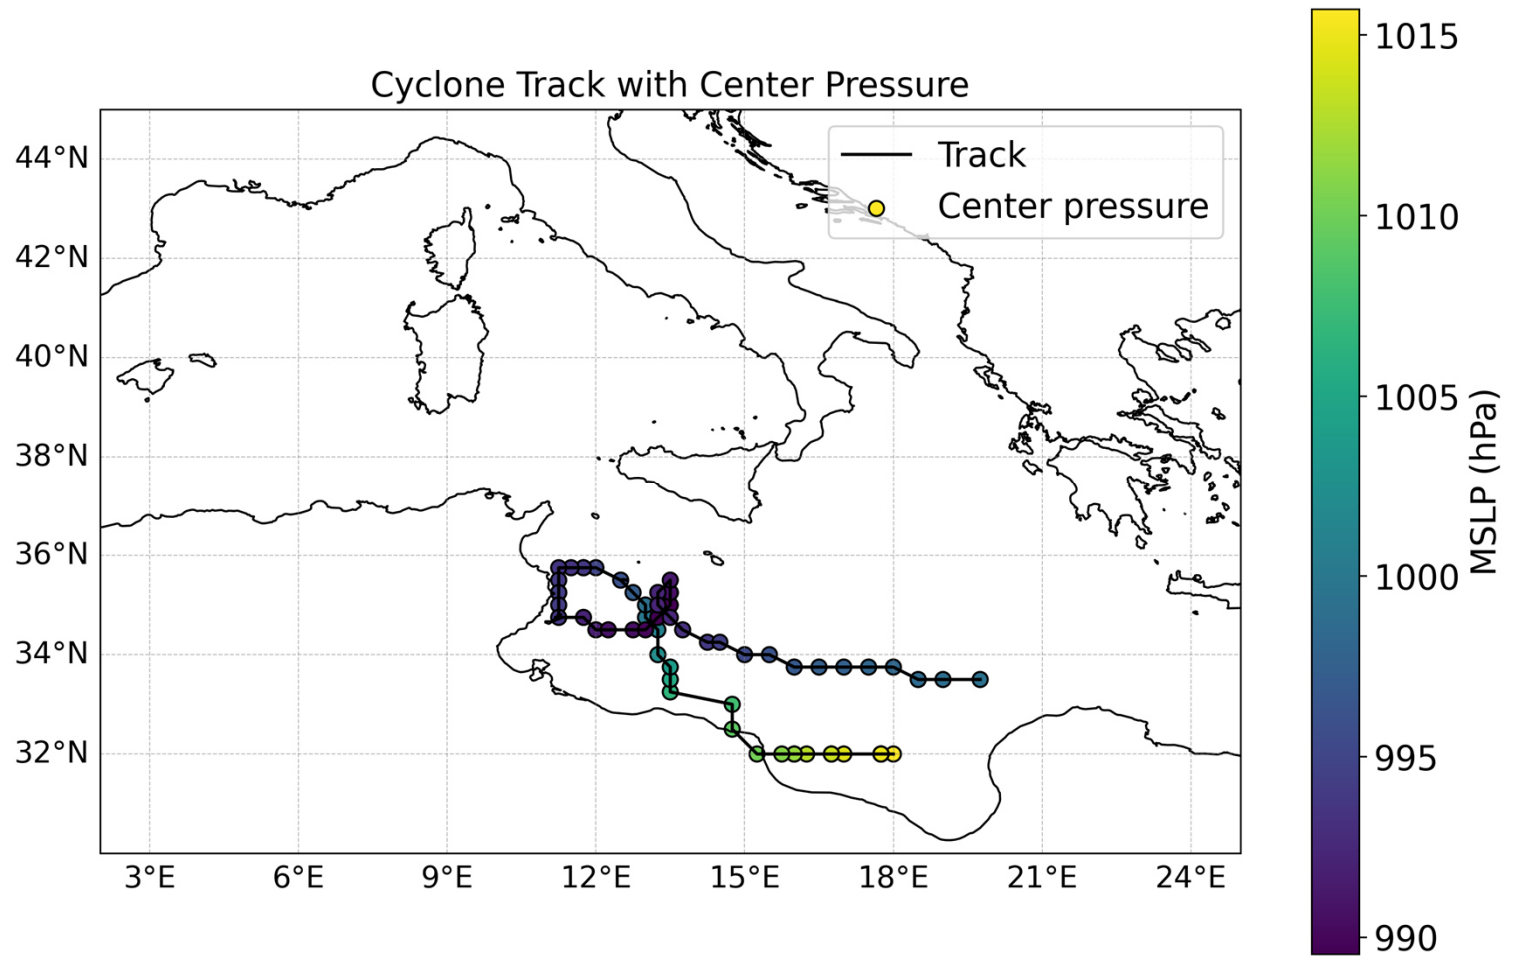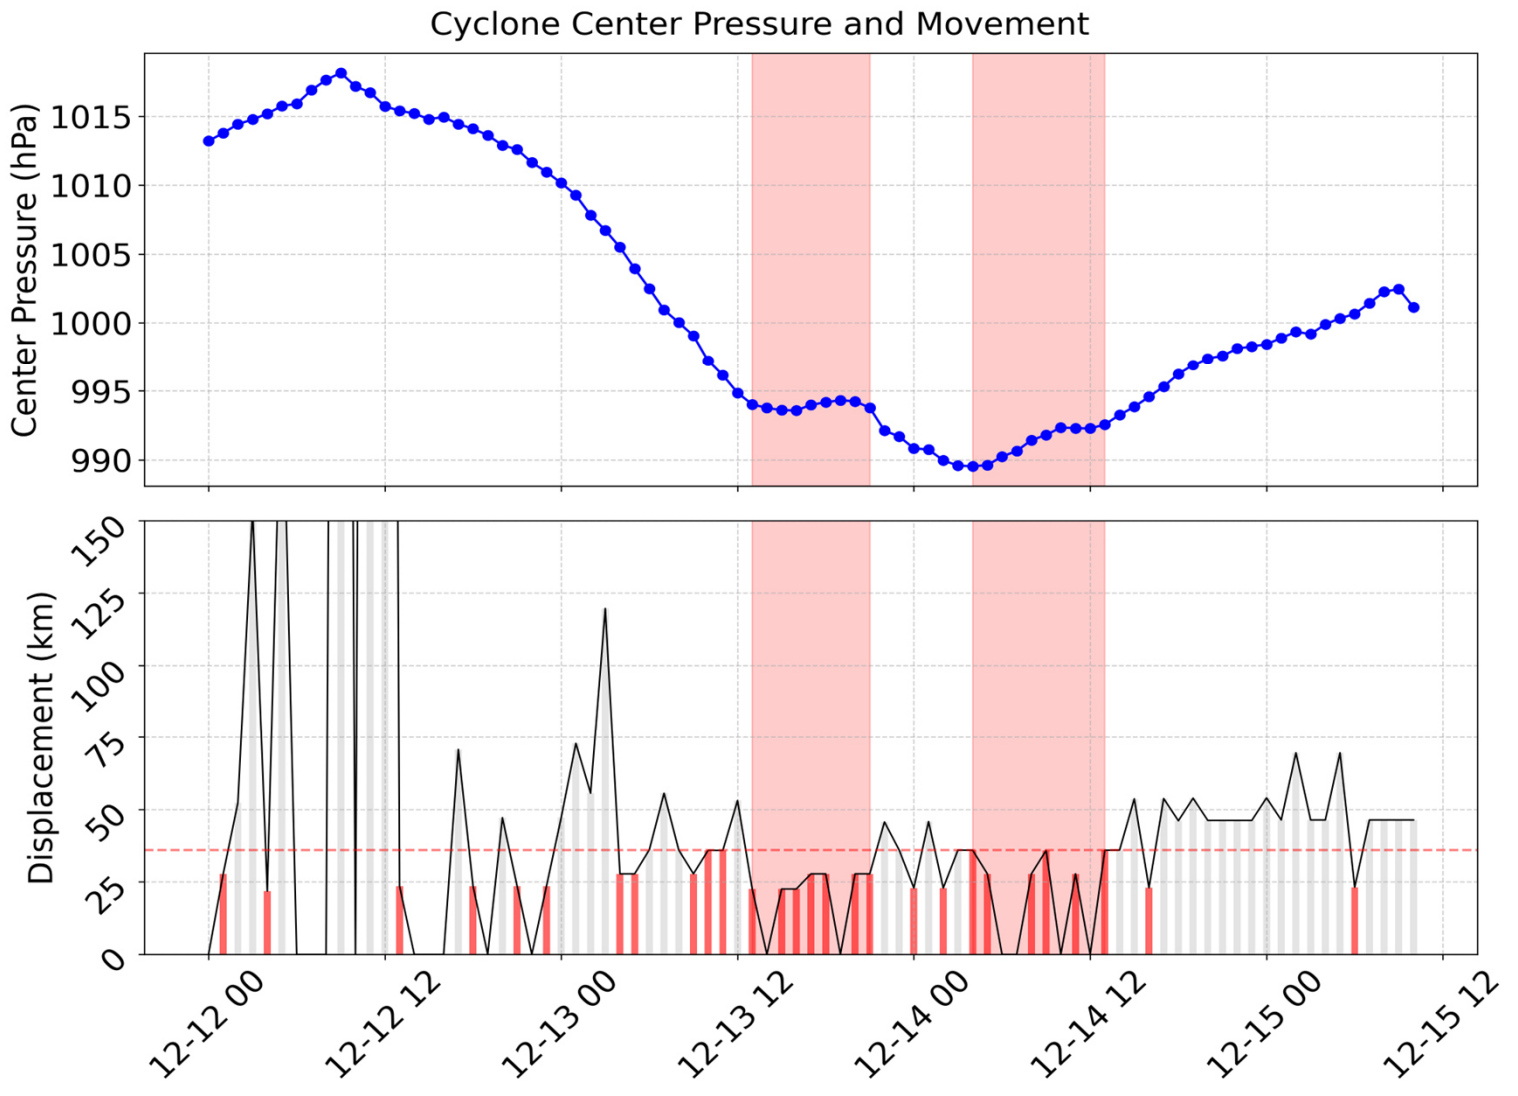

# JANET – October 2007

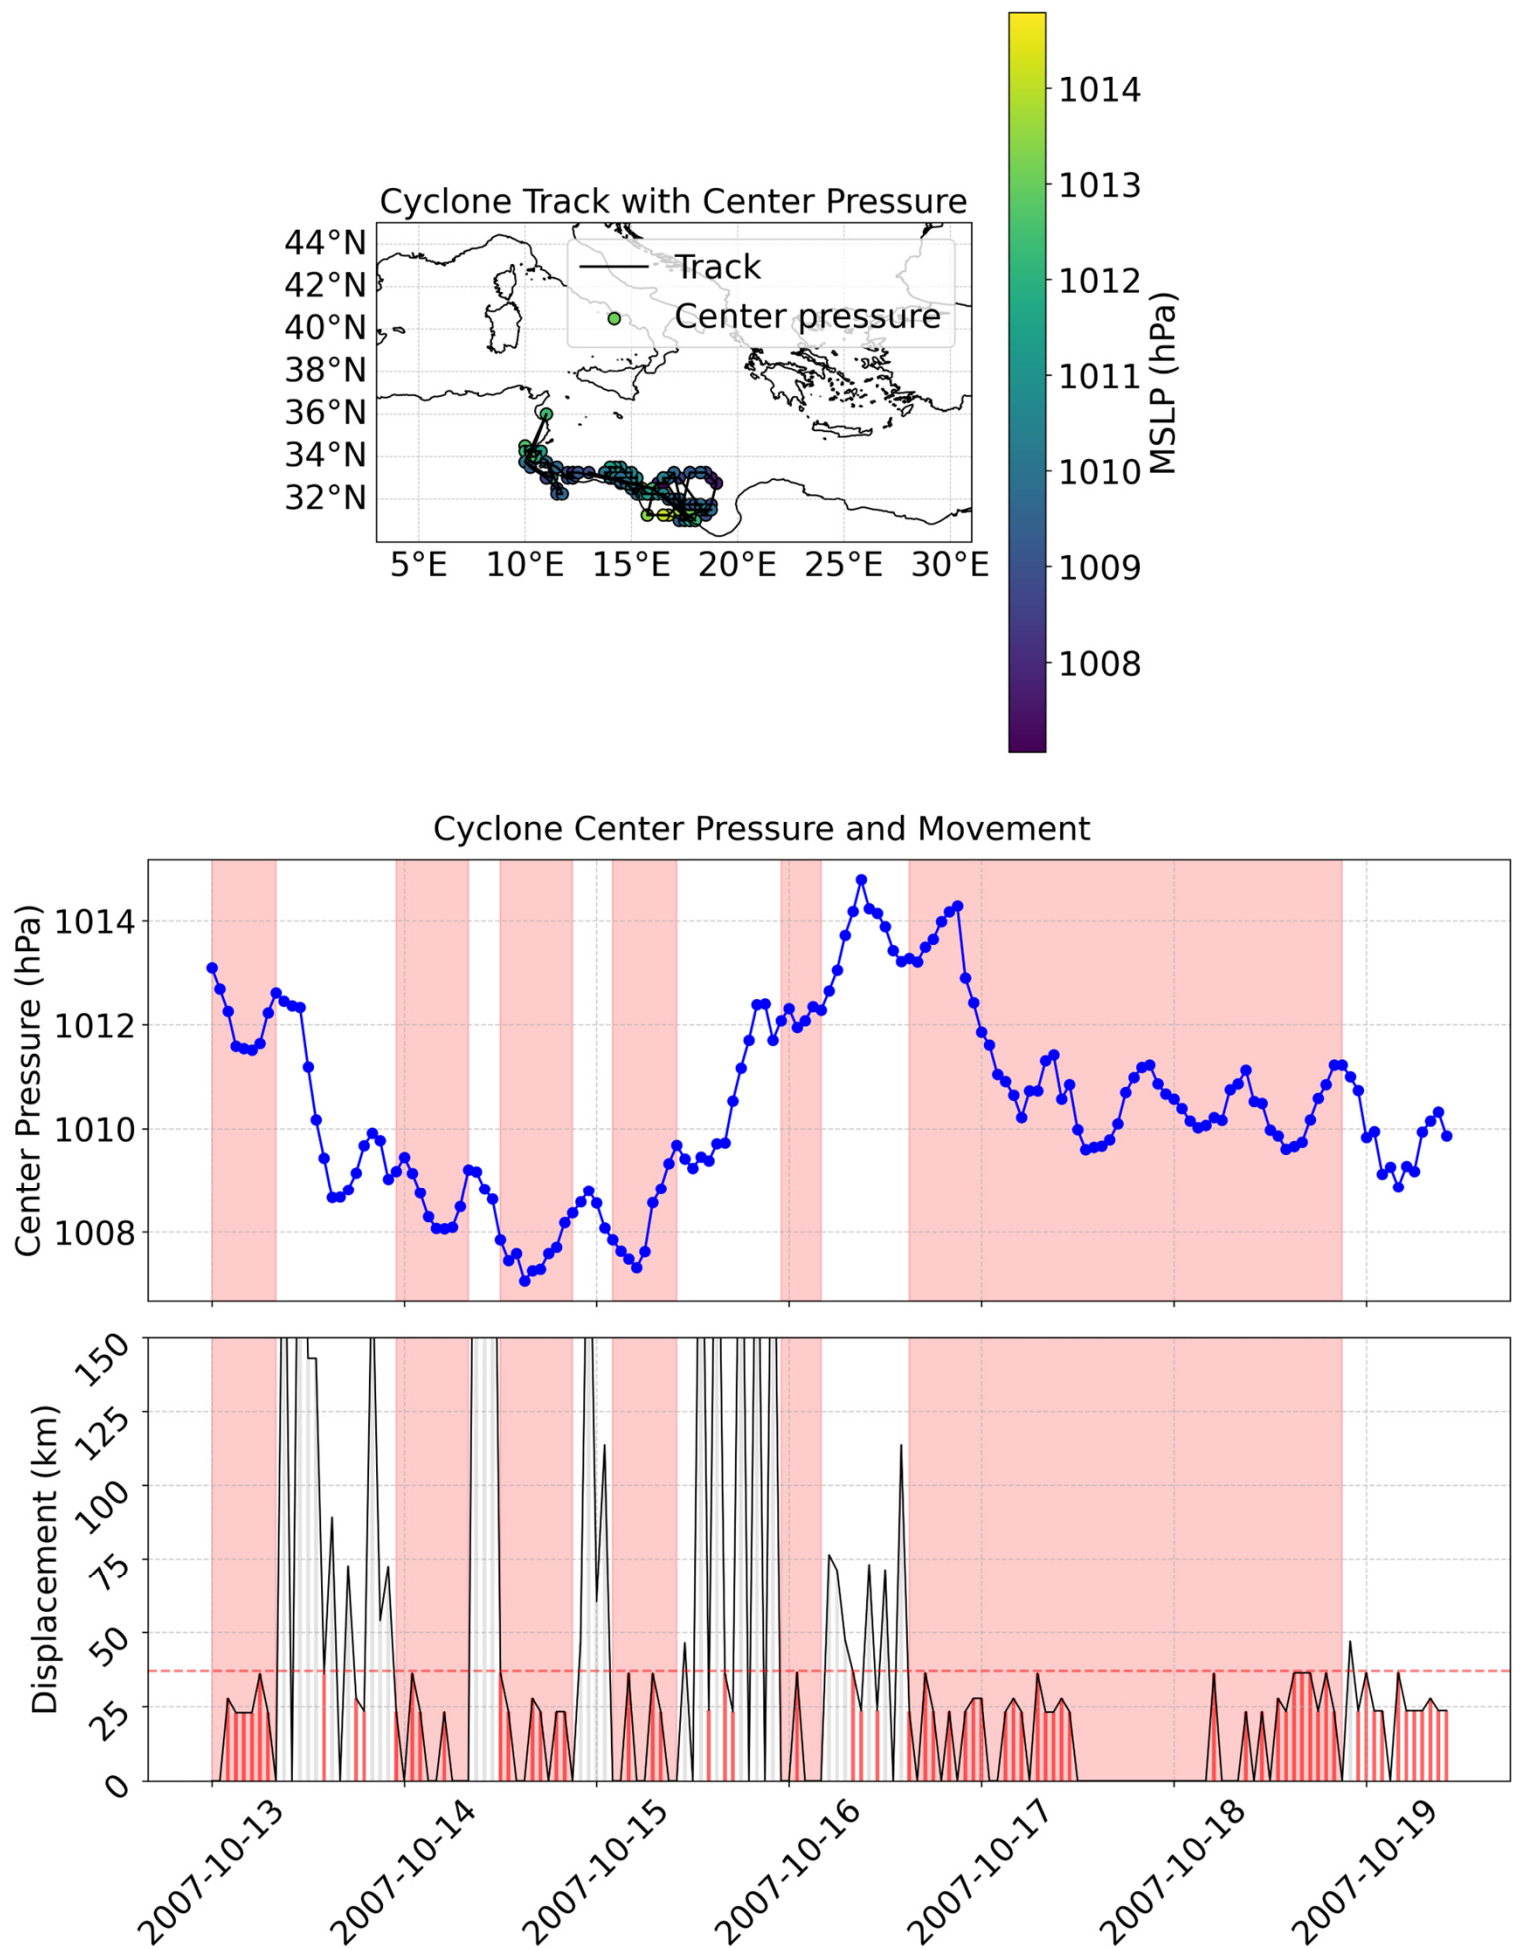

# ROLF – November 2011

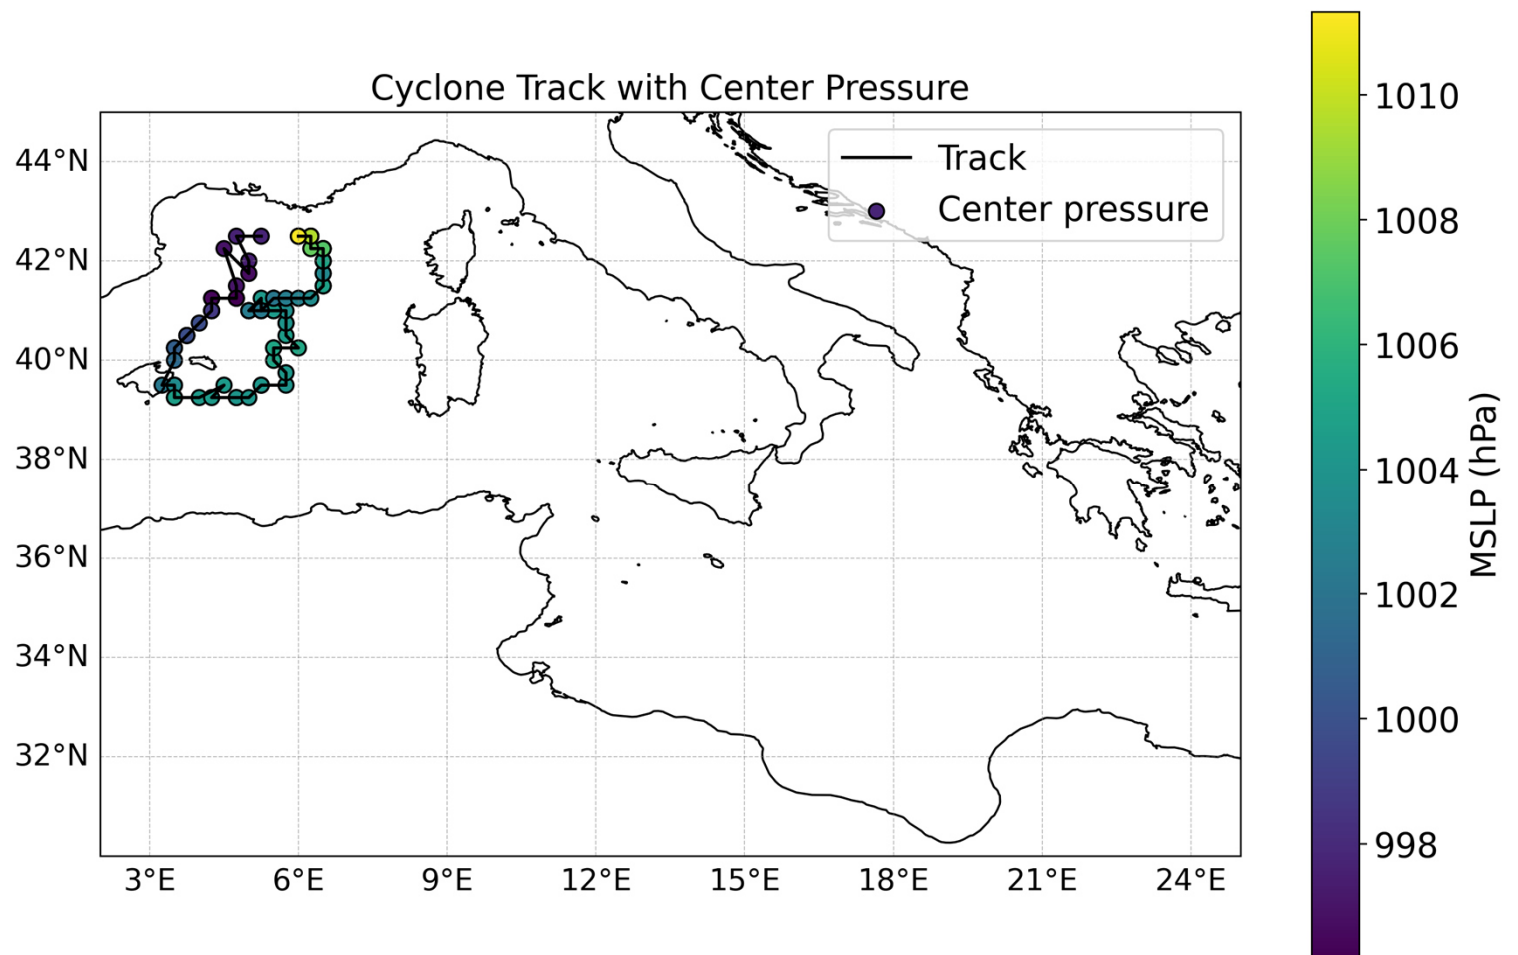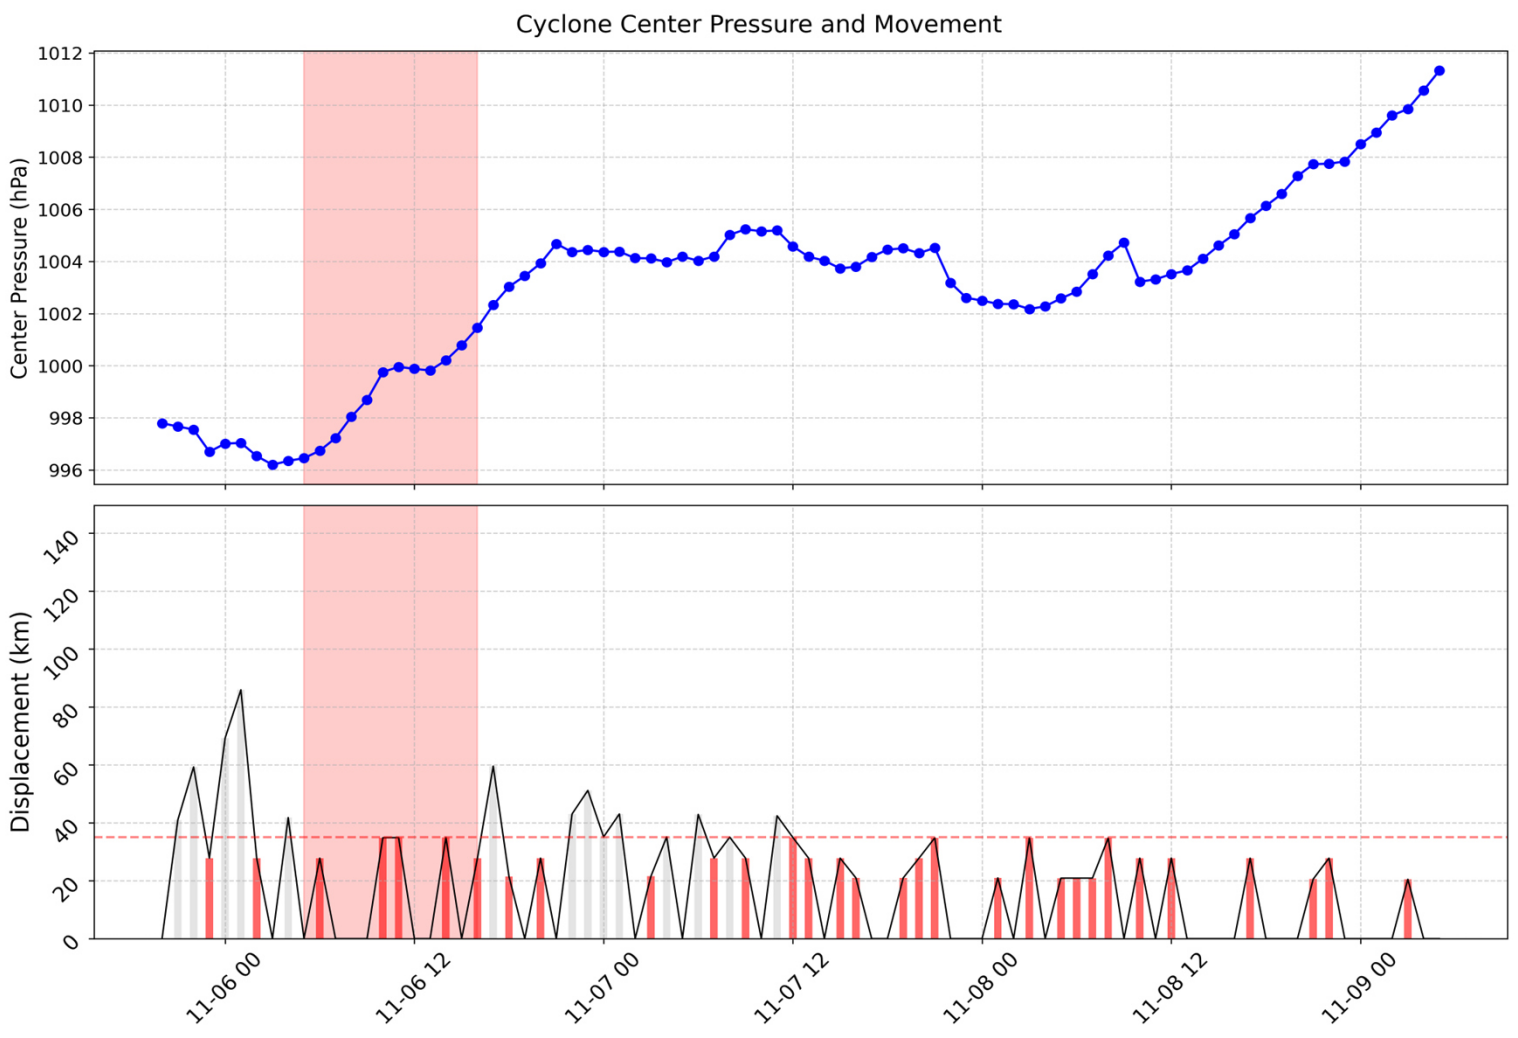

# AKLE – January 2011

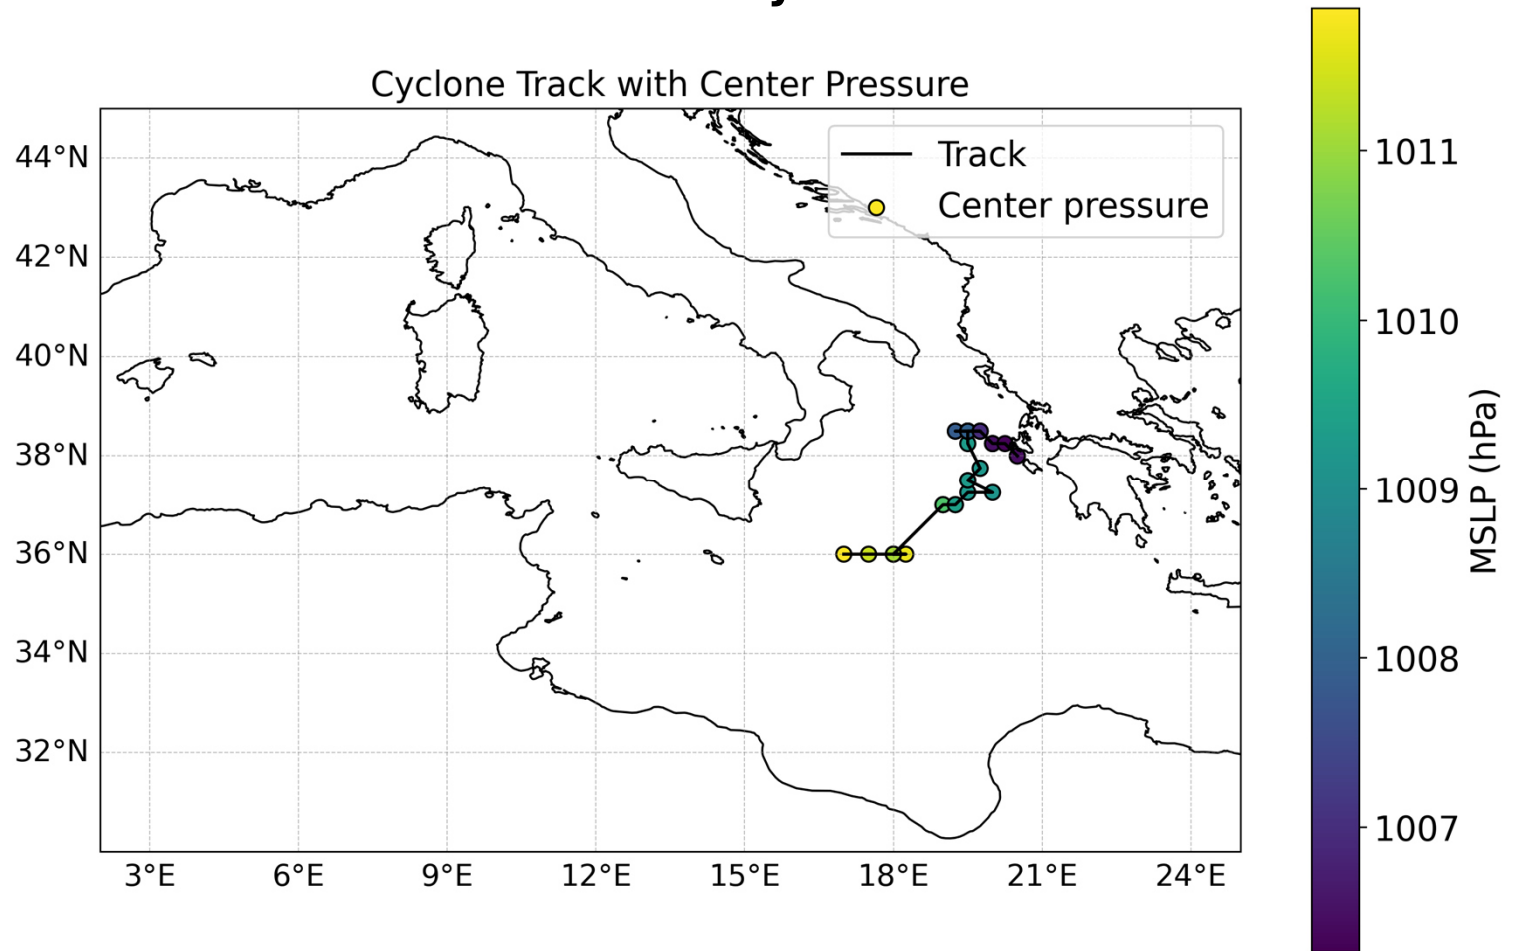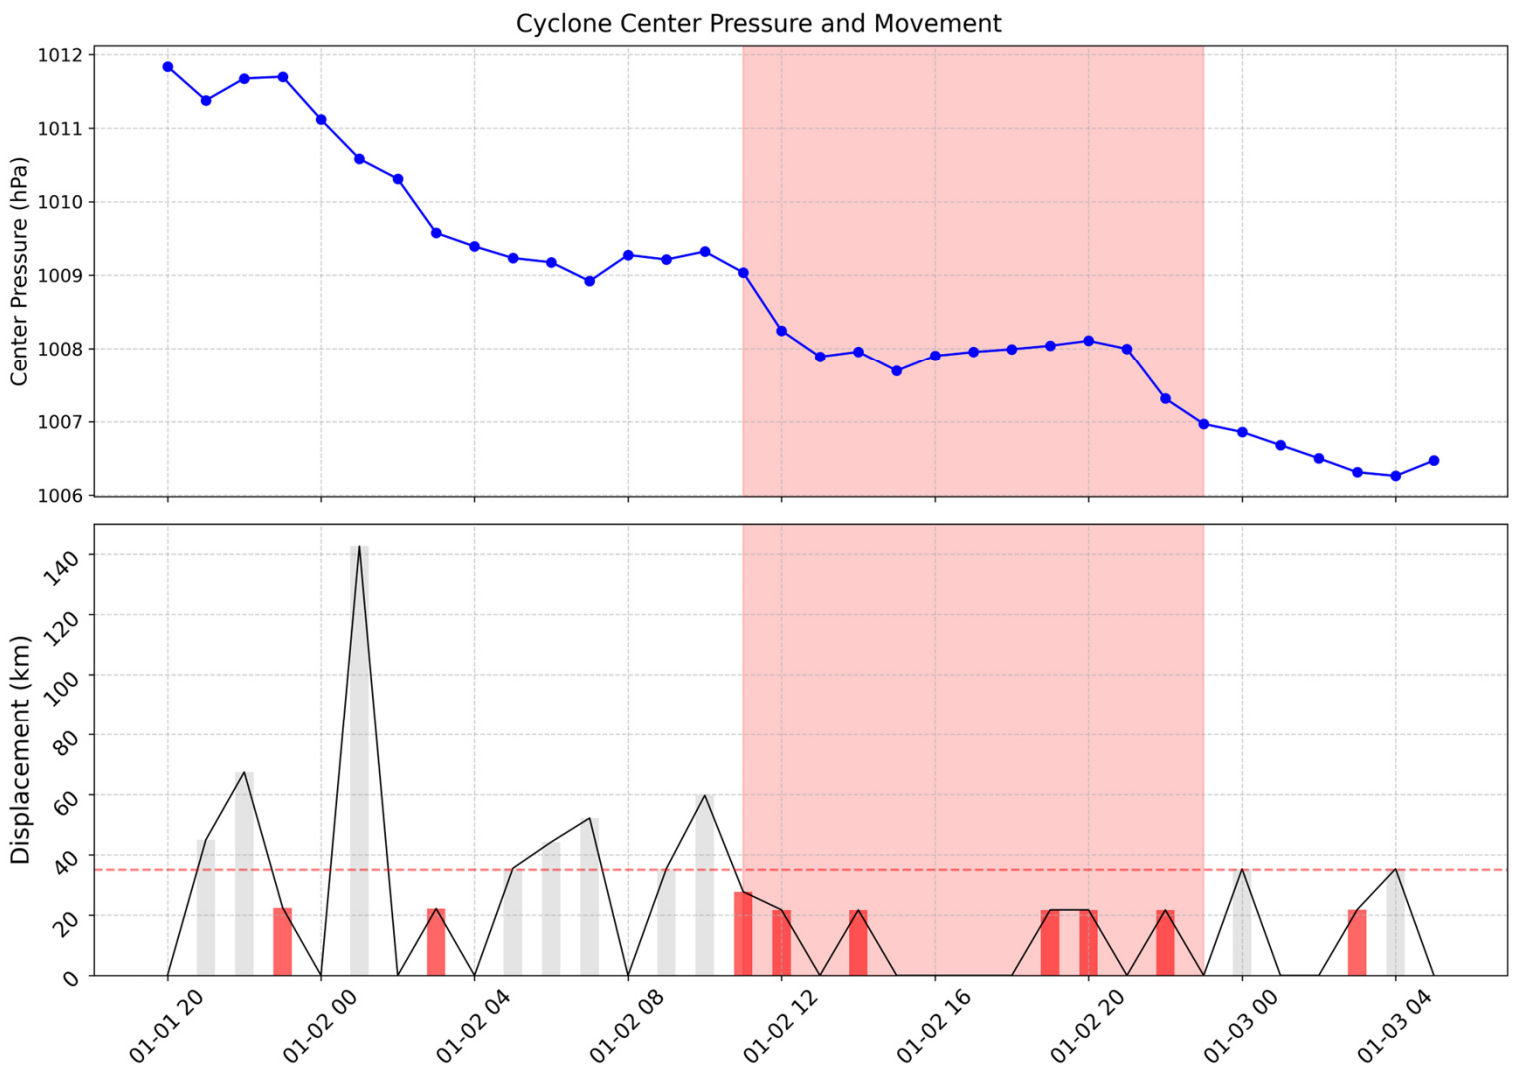

# QENDRESA – November 2014

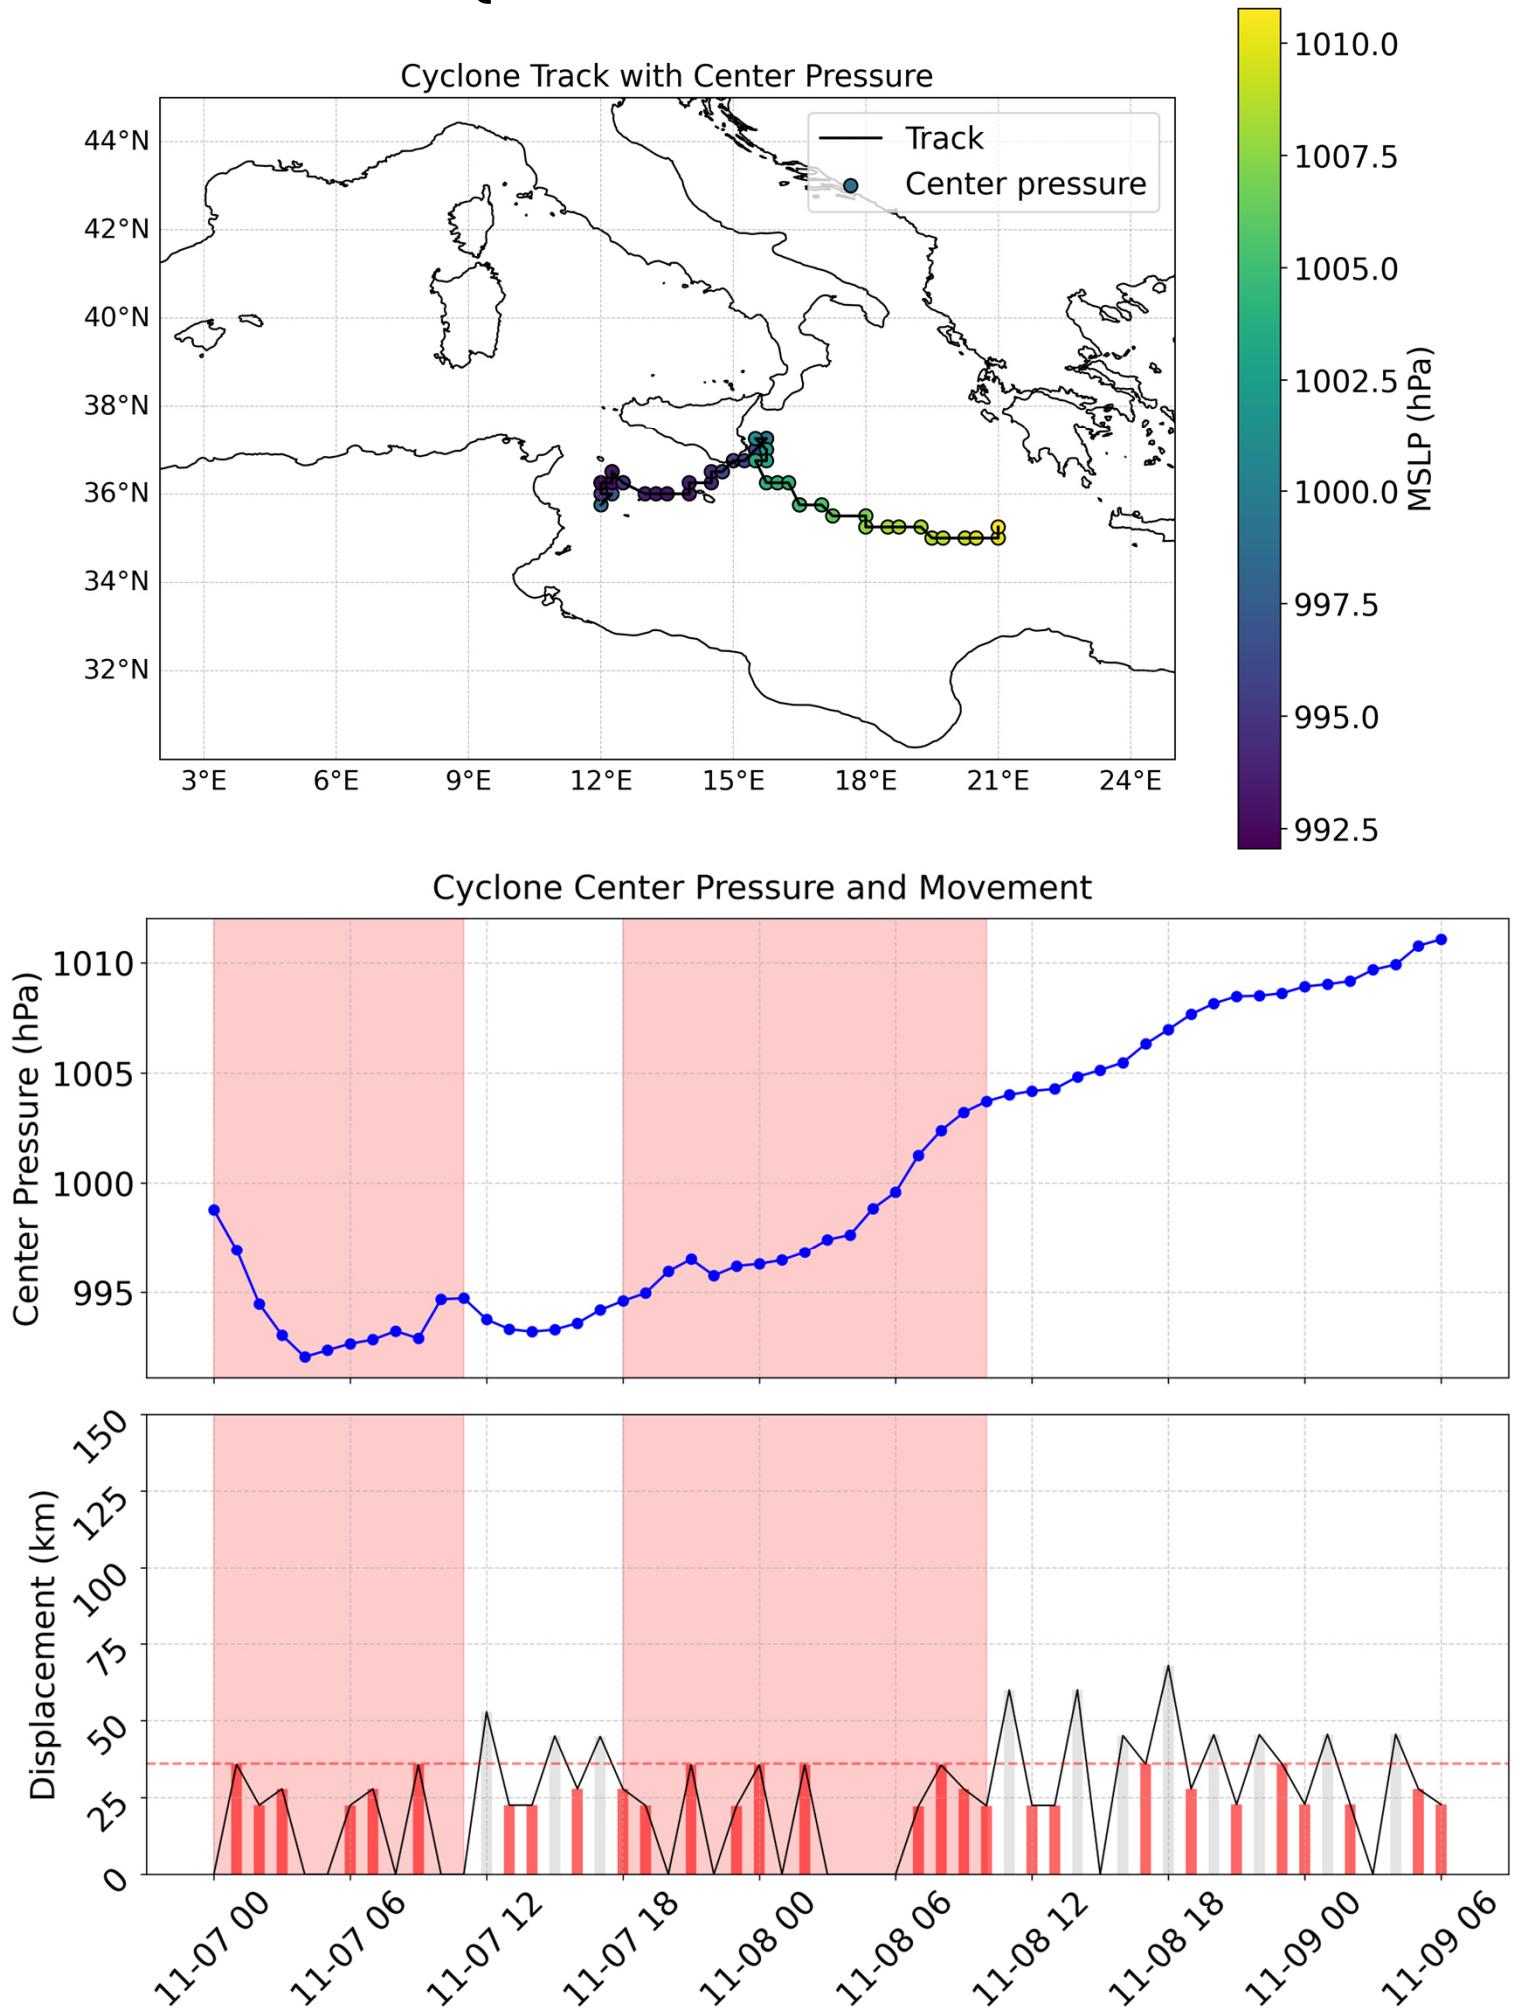

# XANDRA – December 2014

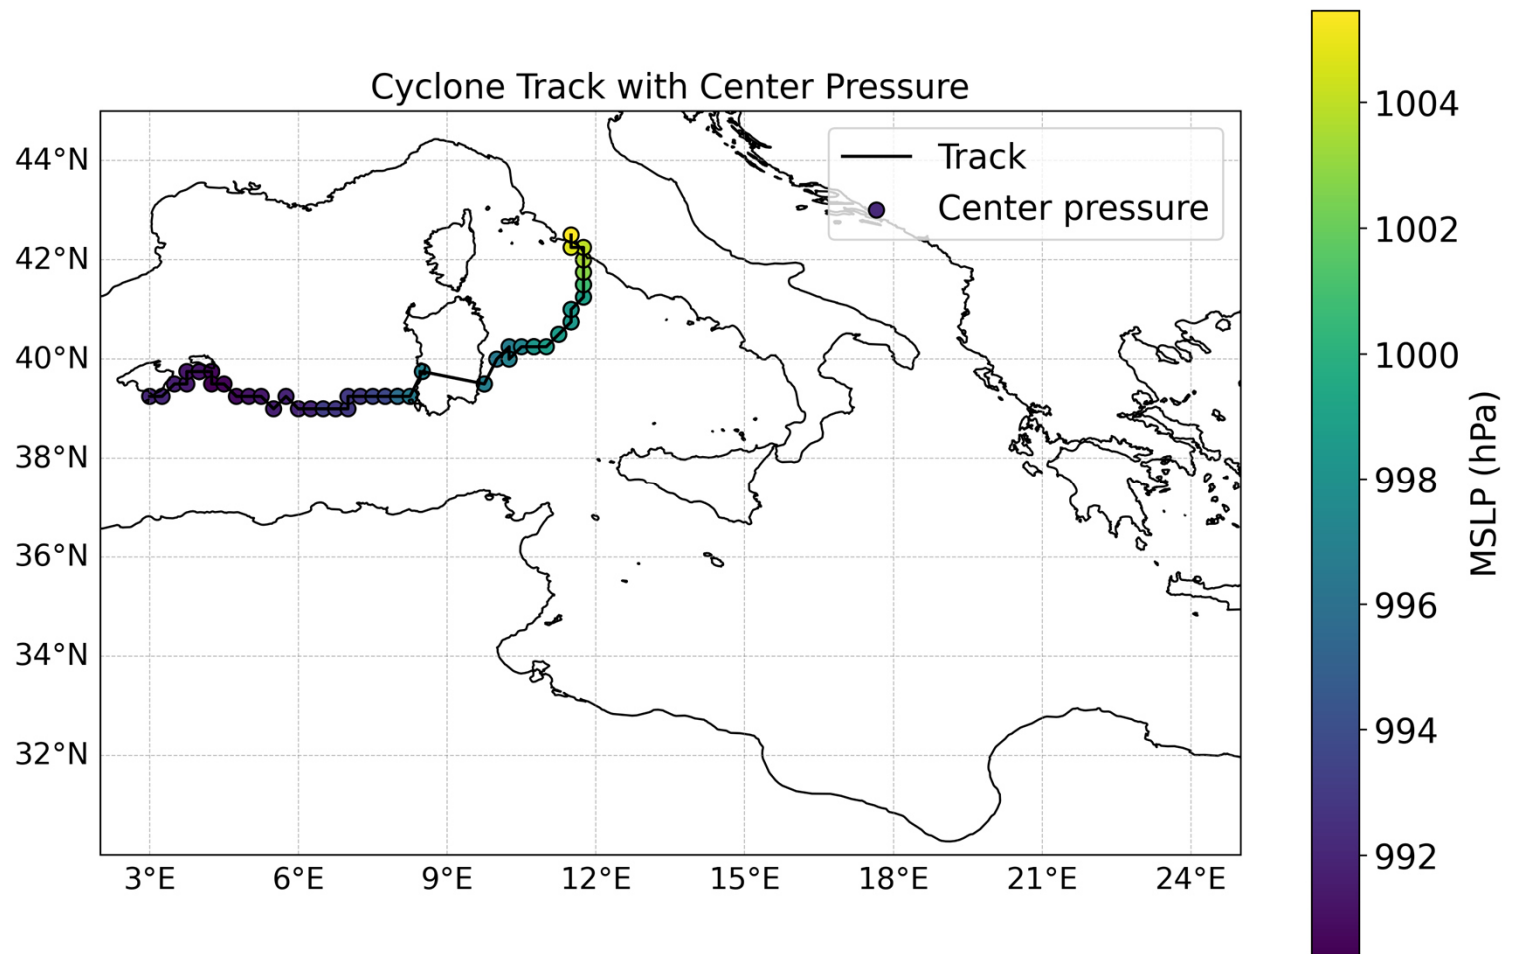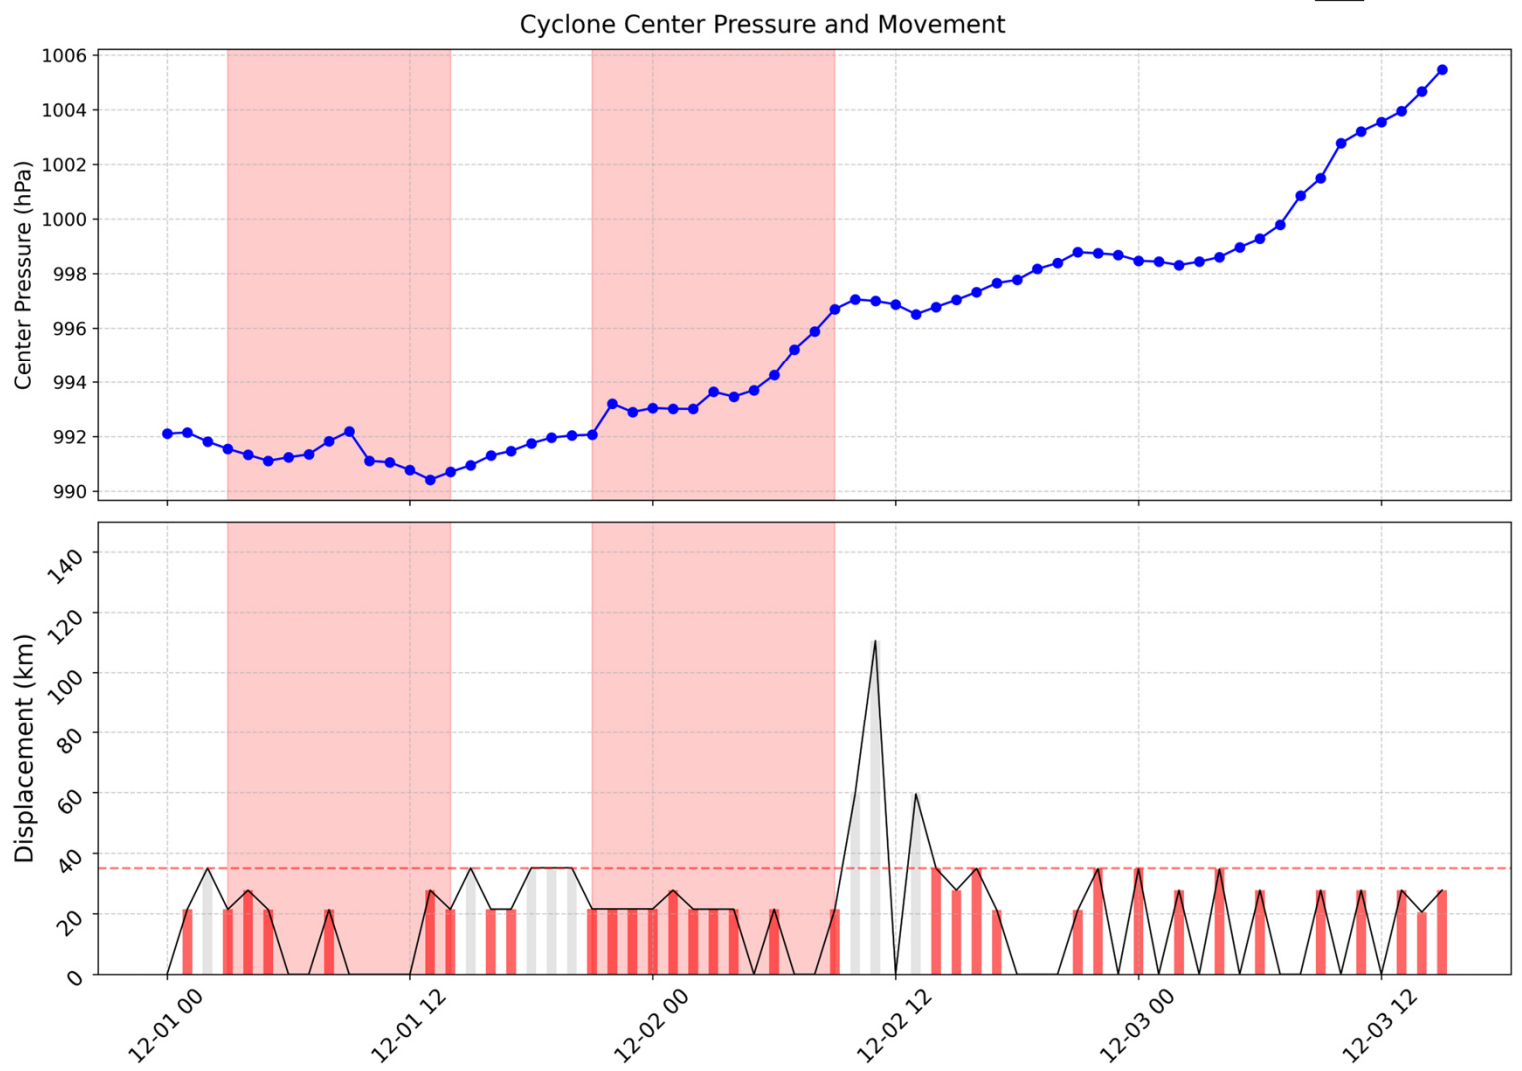

# ERIK – May 2015

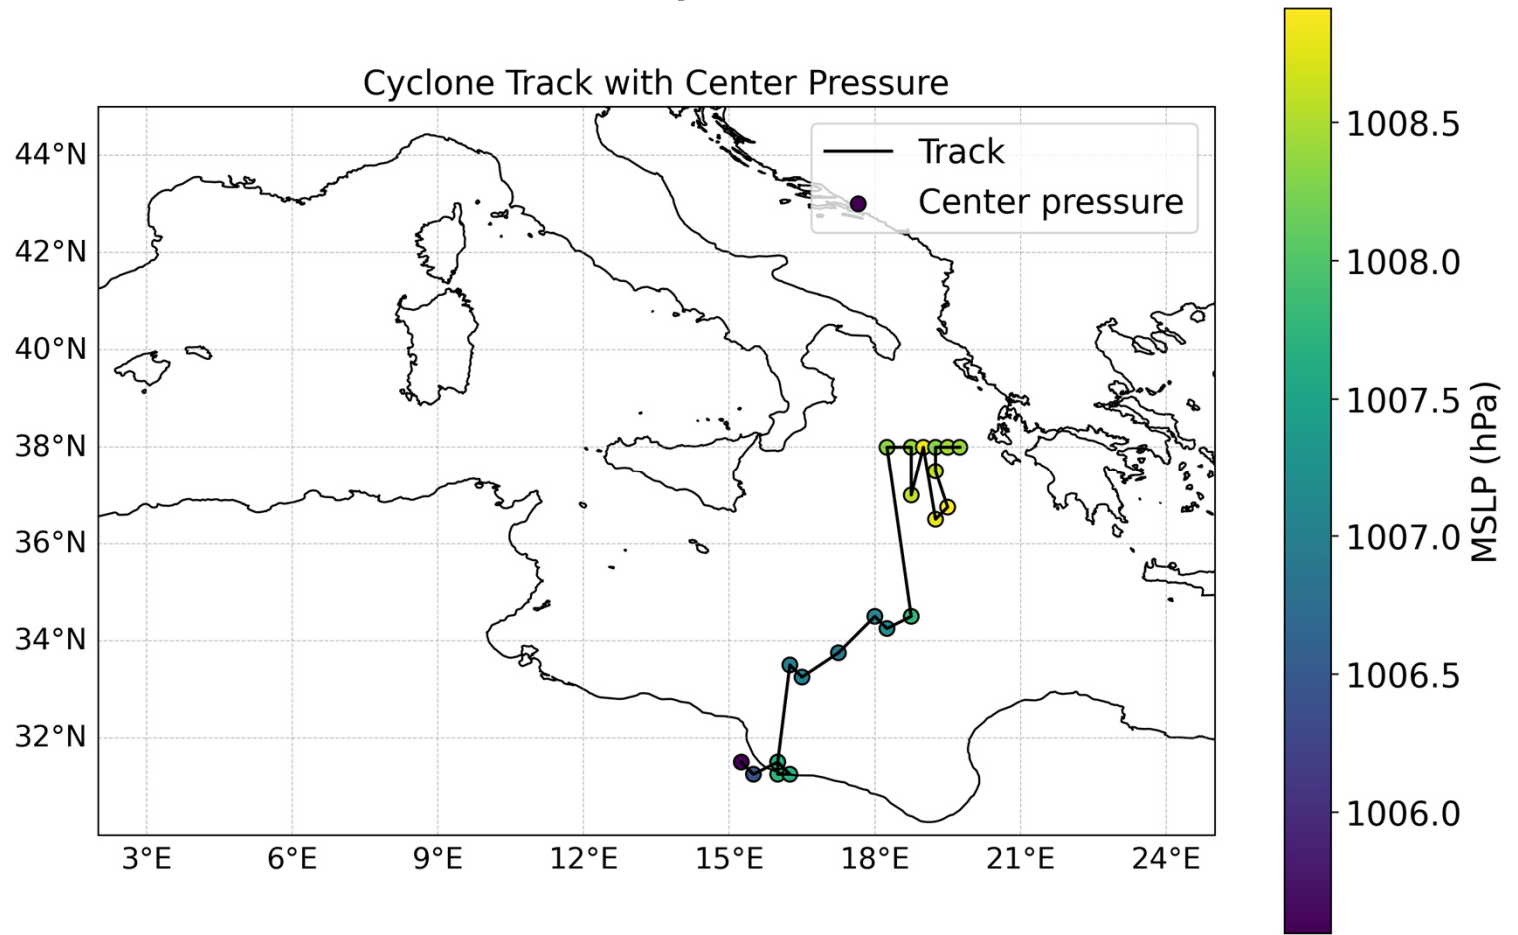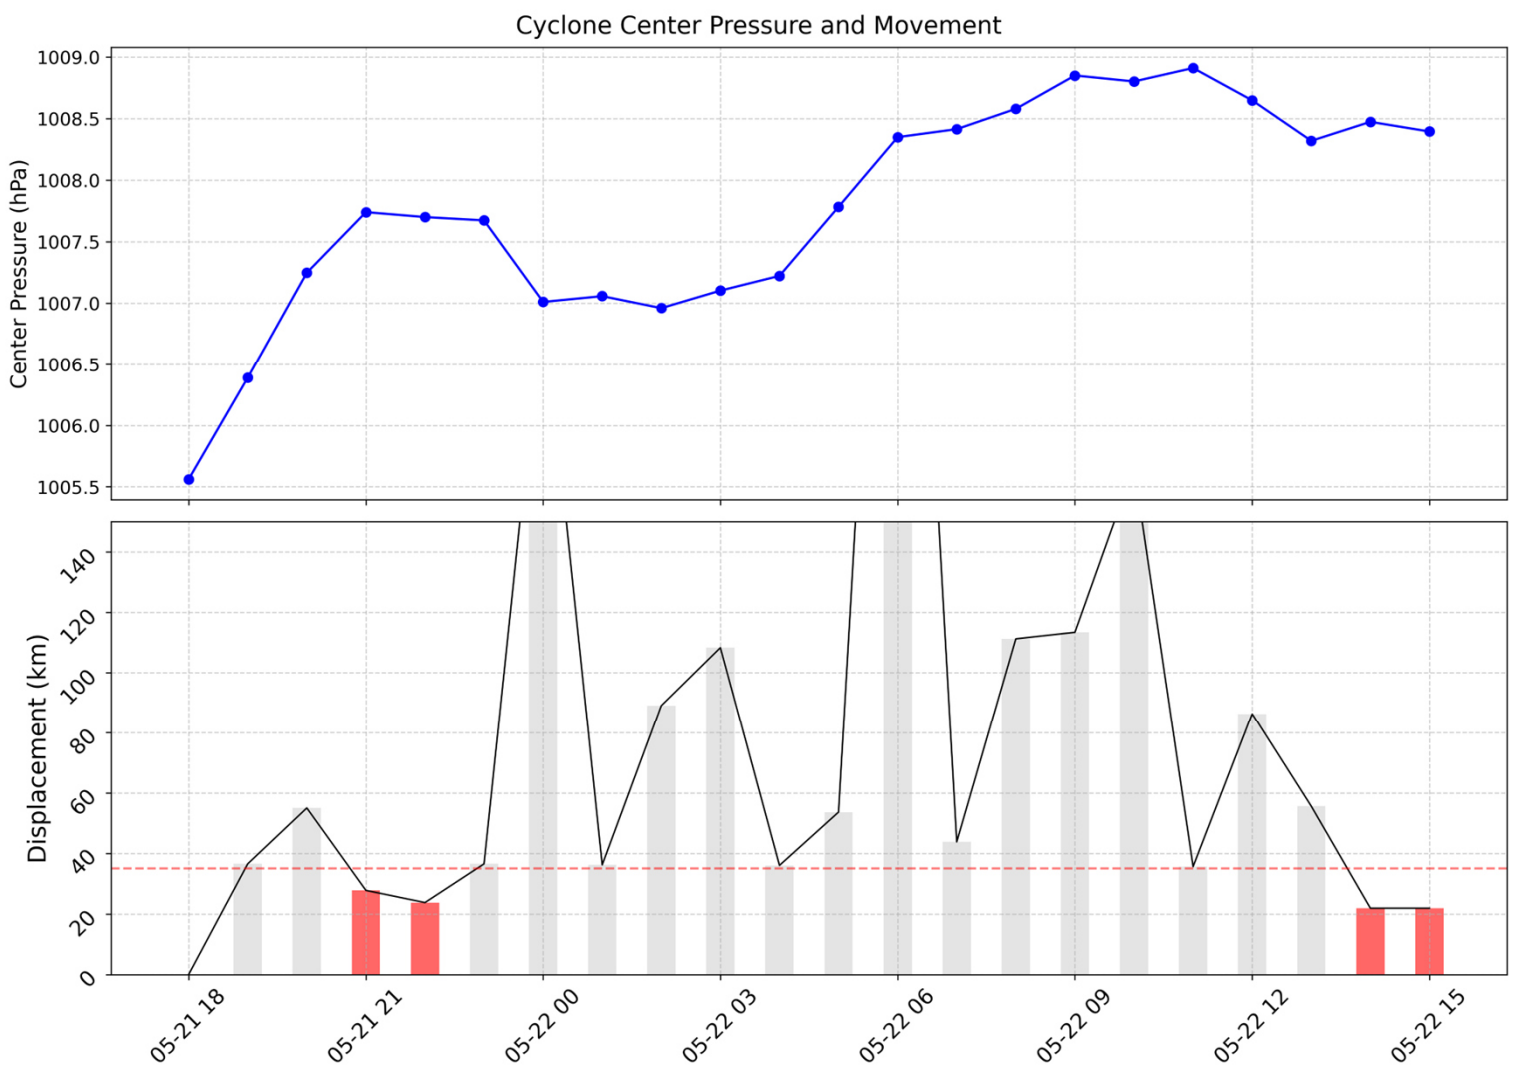

# CAULONIA – March 2016

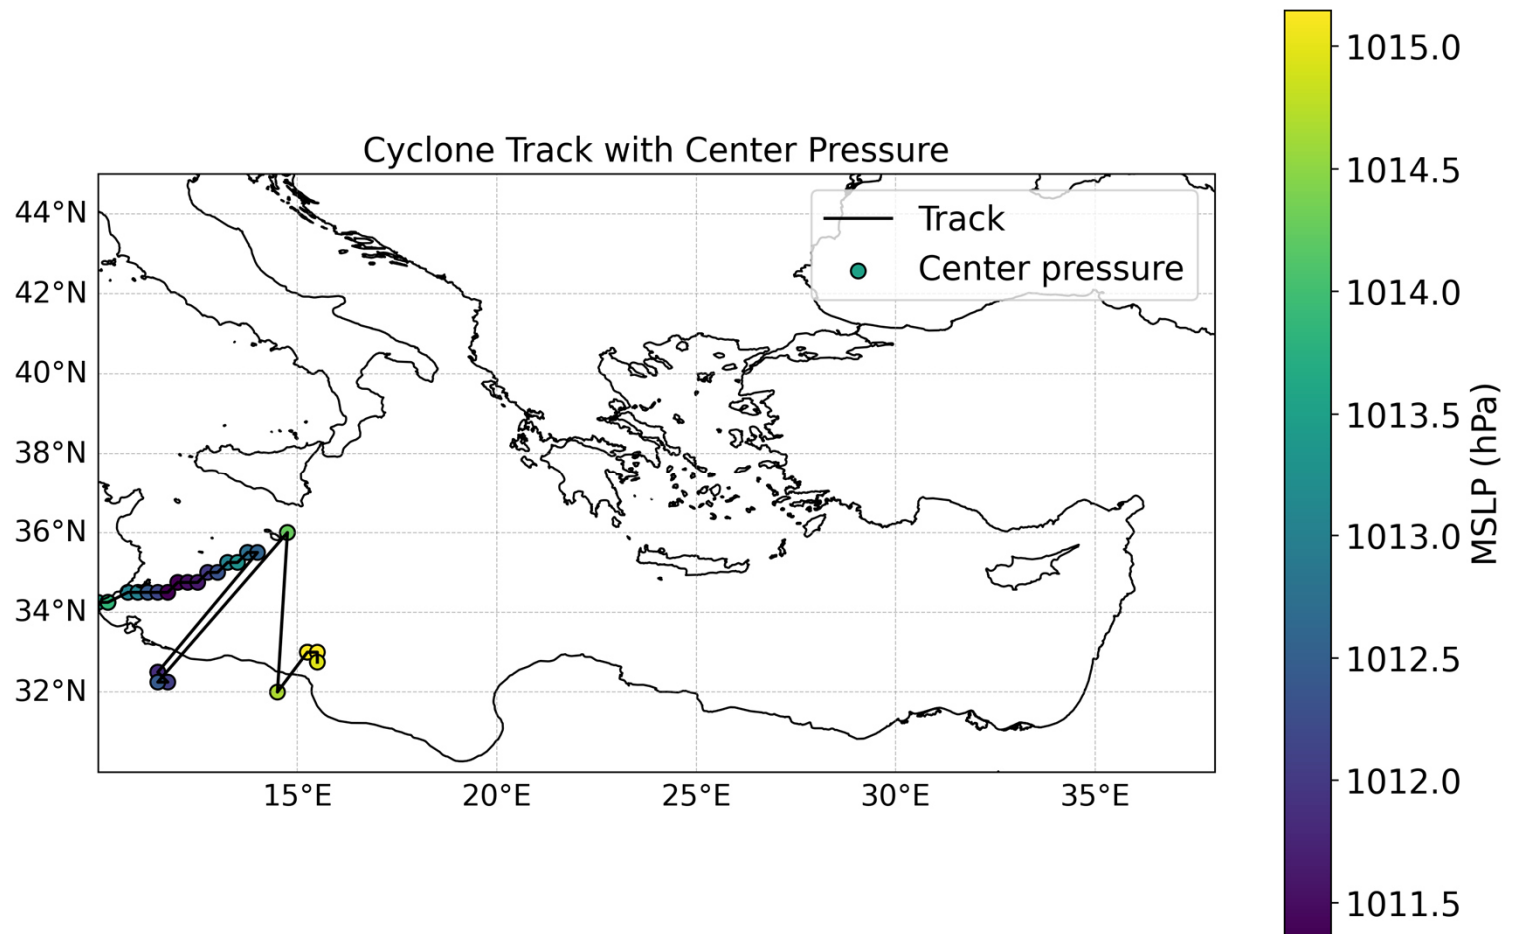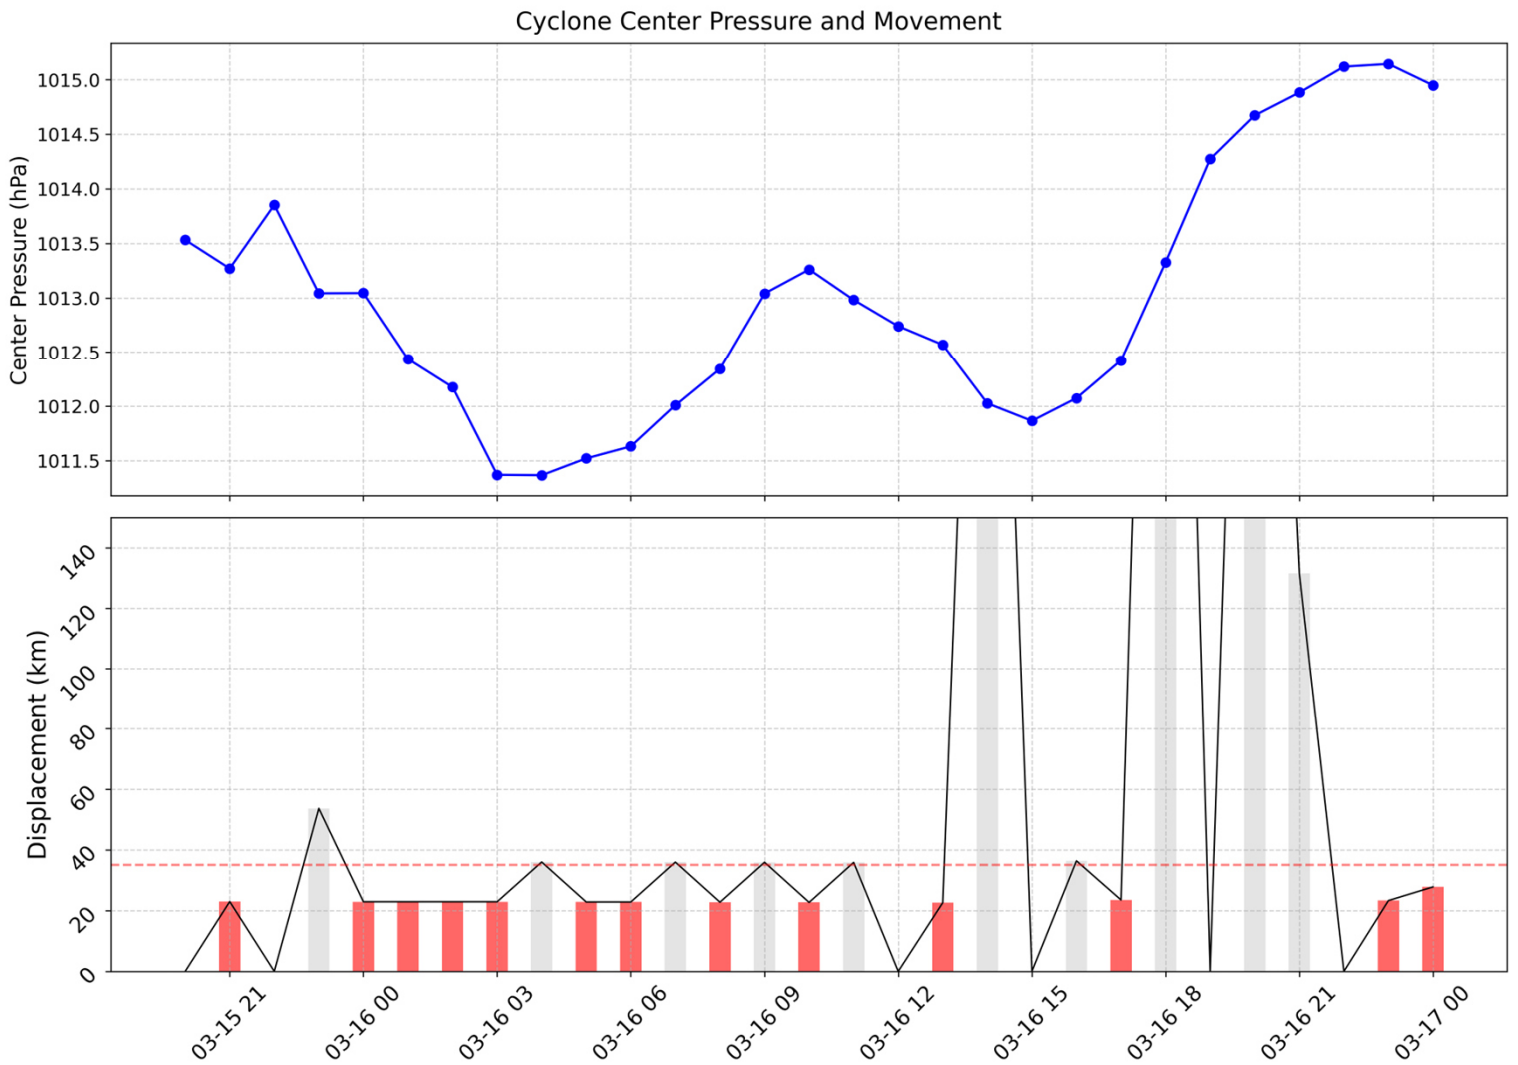

# TRIXIE – October 2016

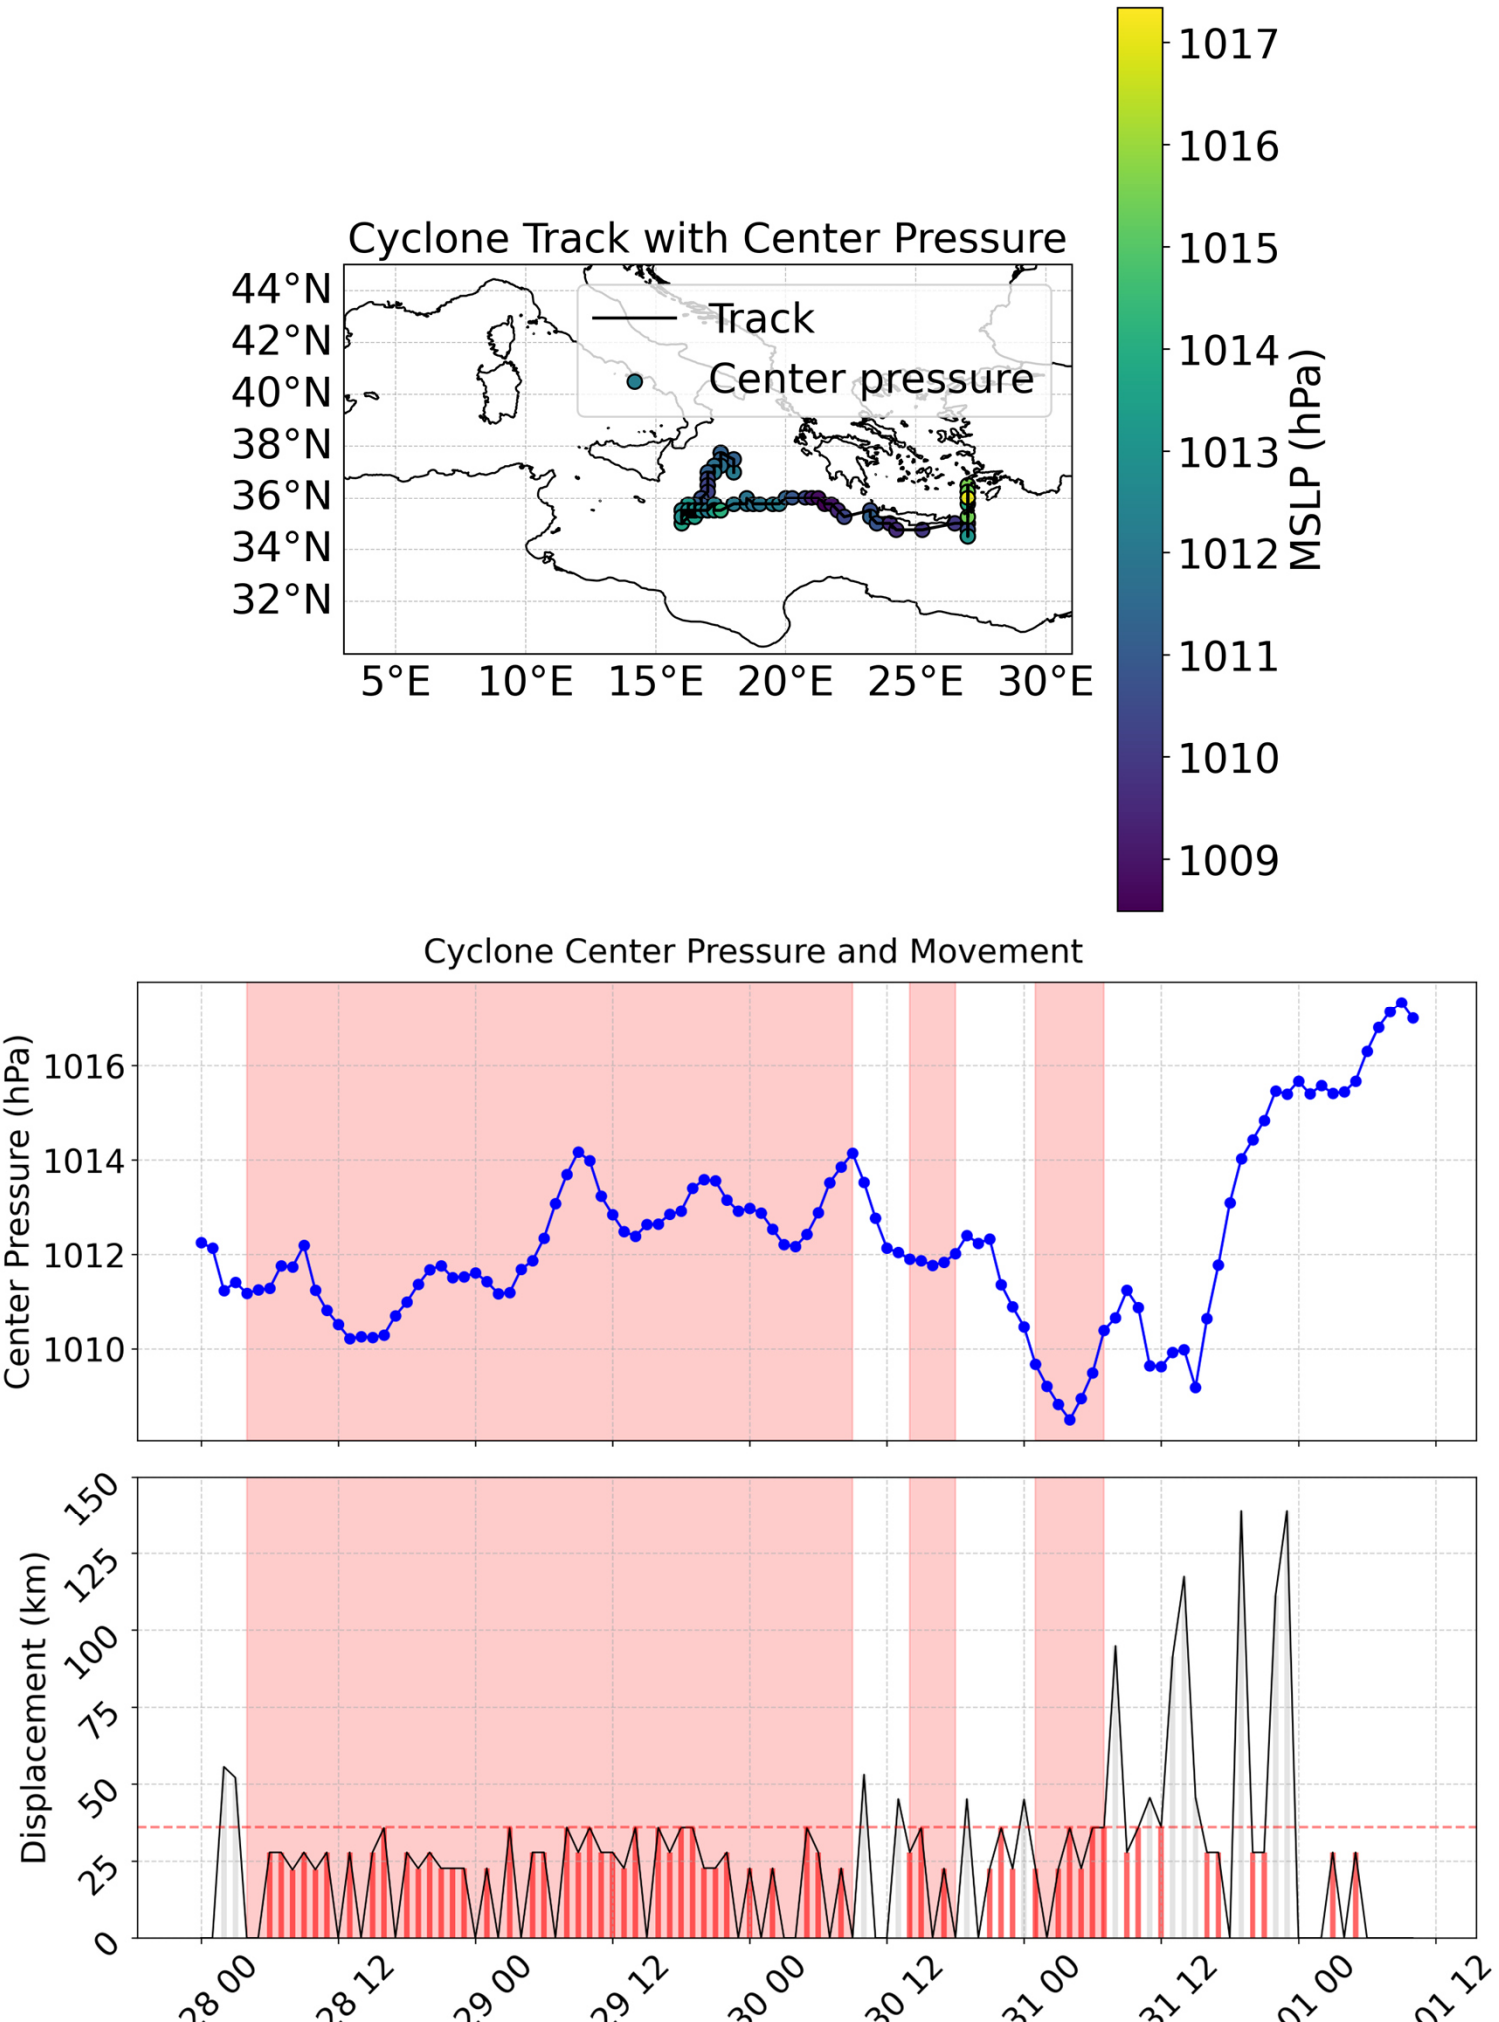

# NUMA – November 2017

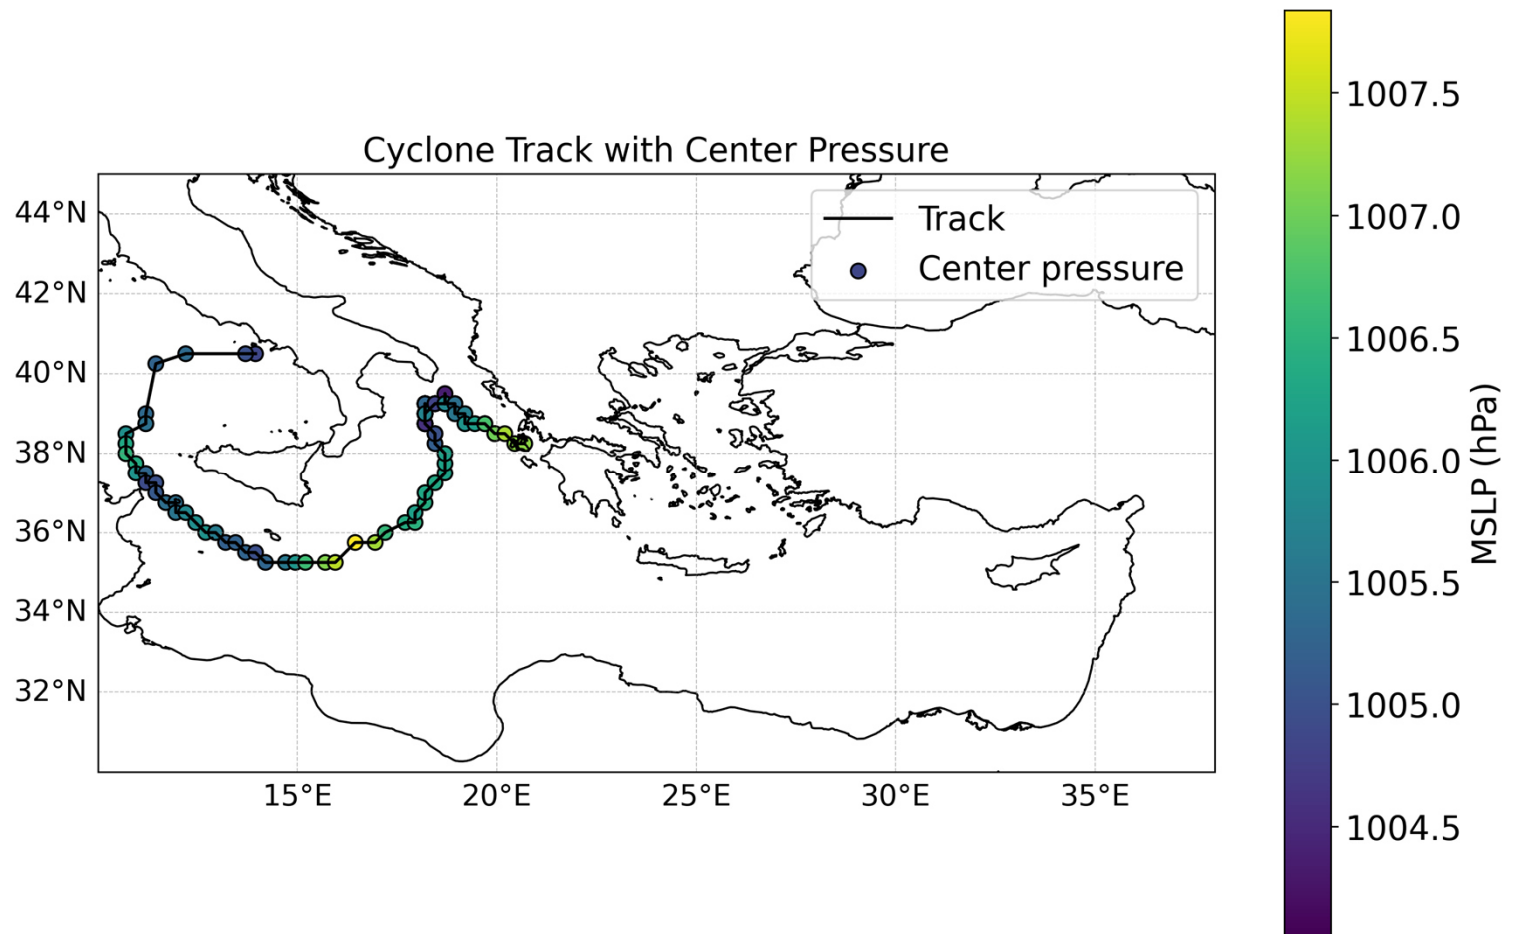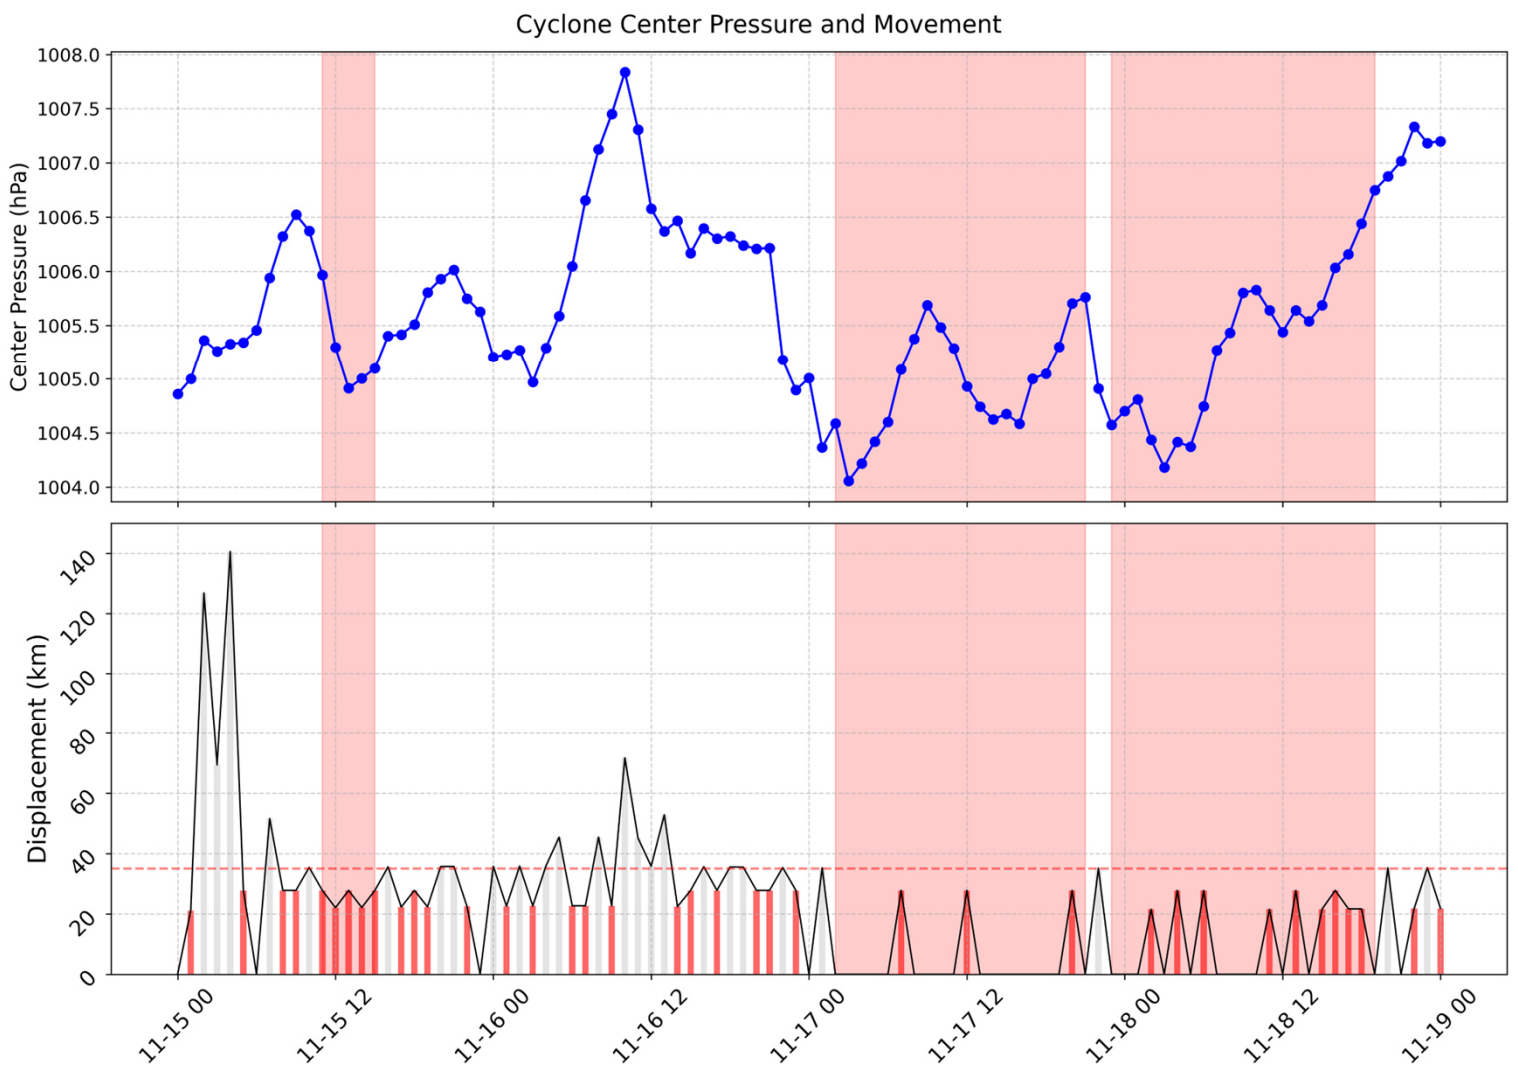

# ZORBAS – September 2018

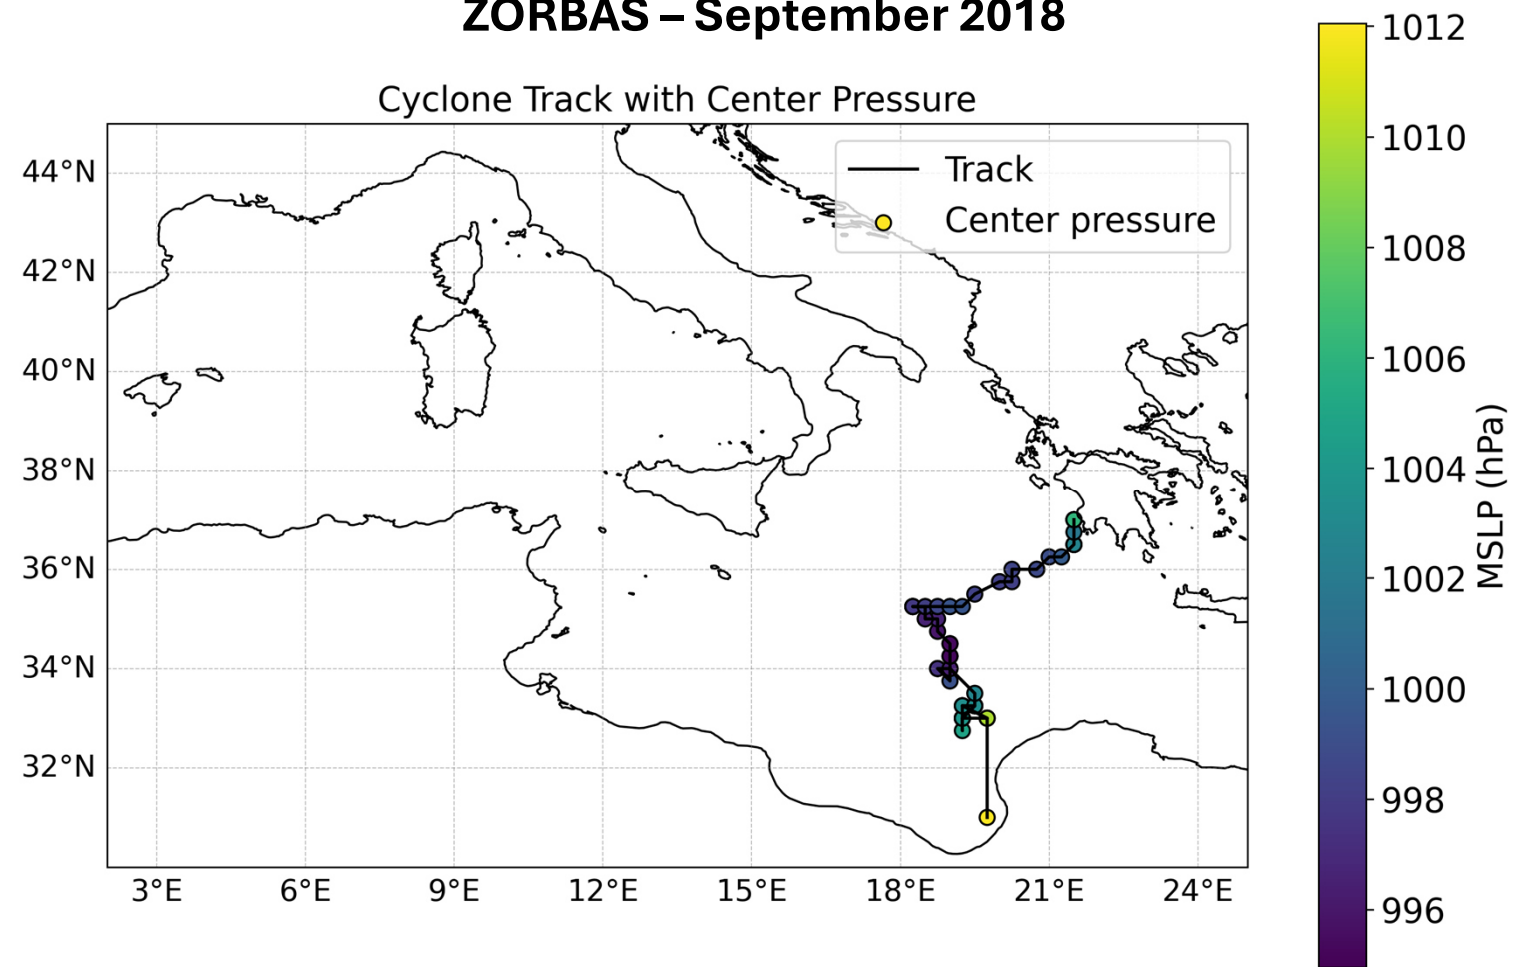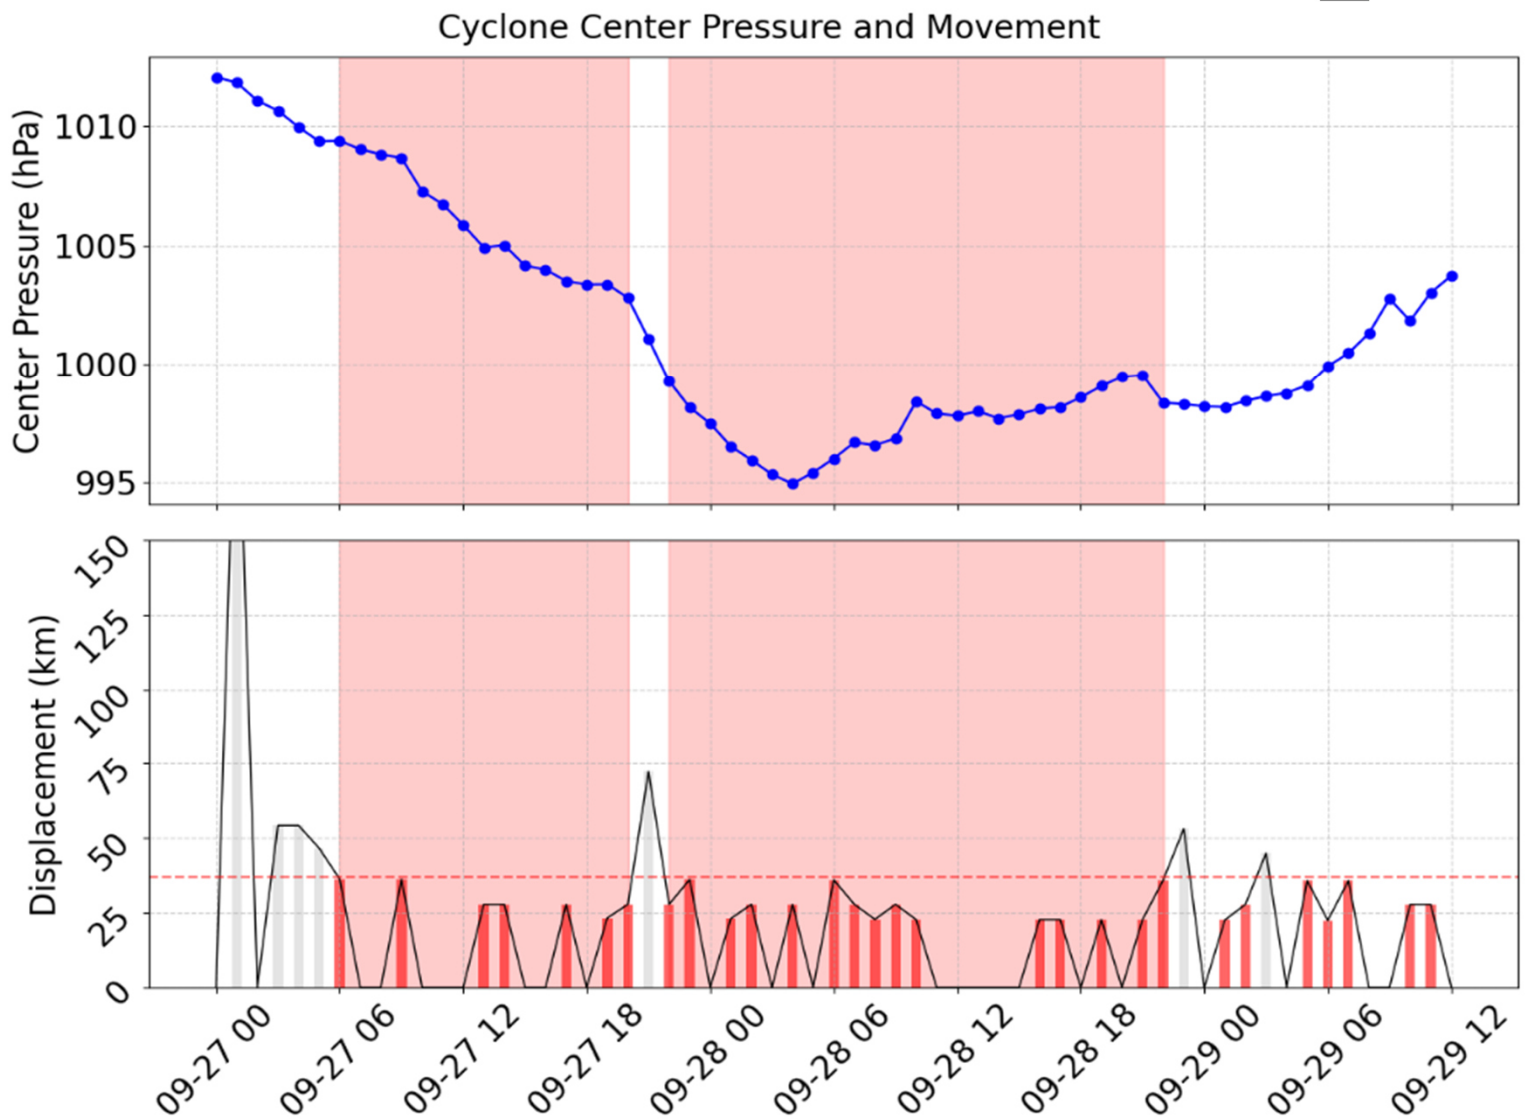

# VAIA – October 2018

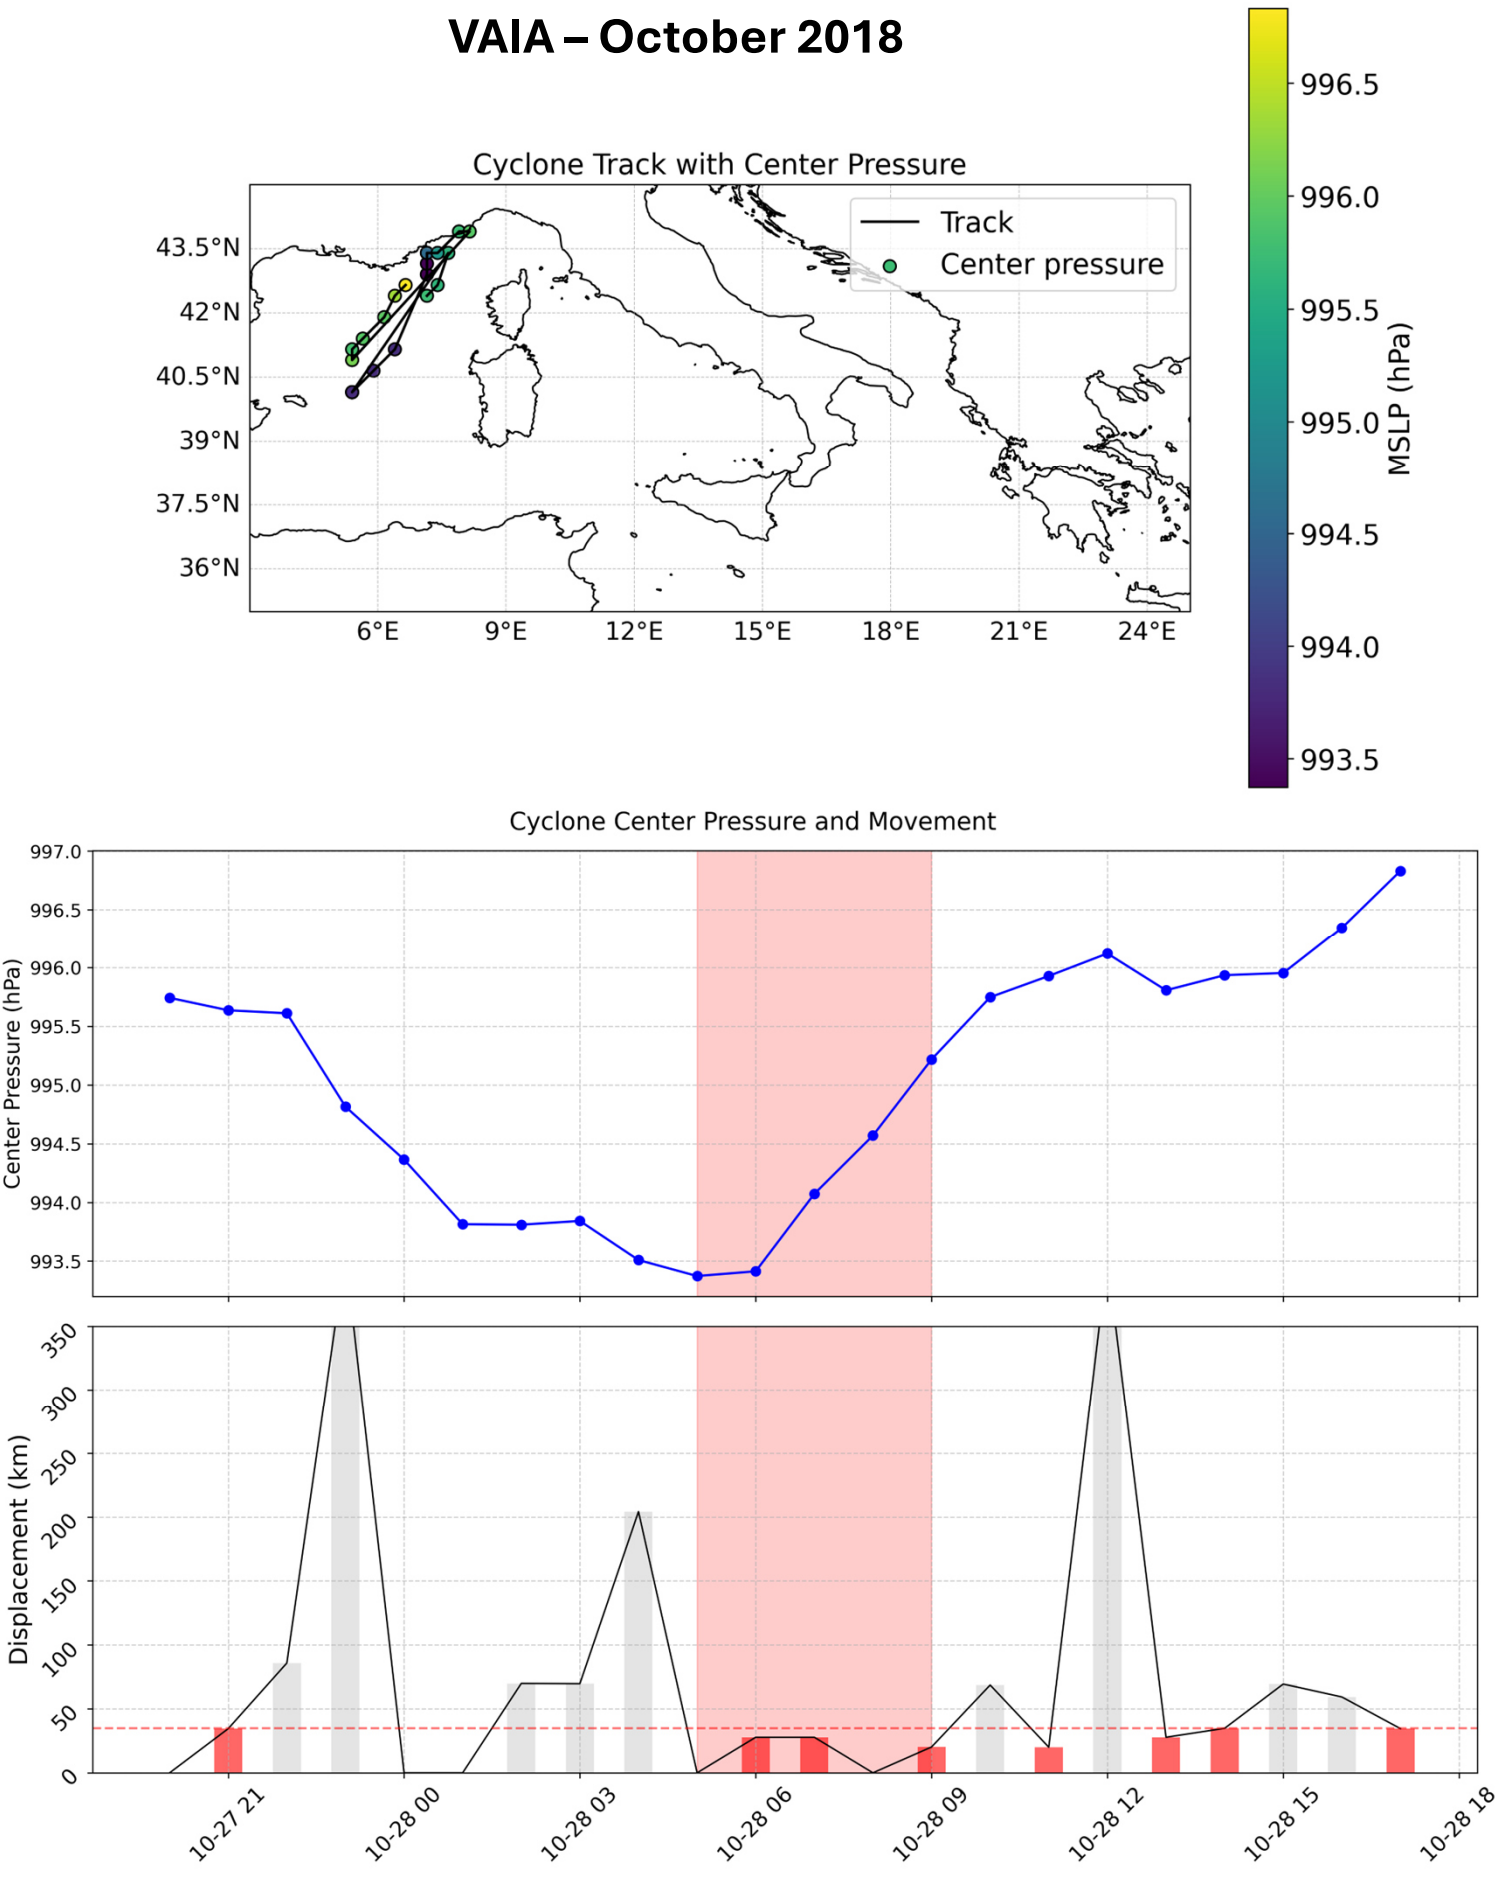

# TRUDY – November 2019

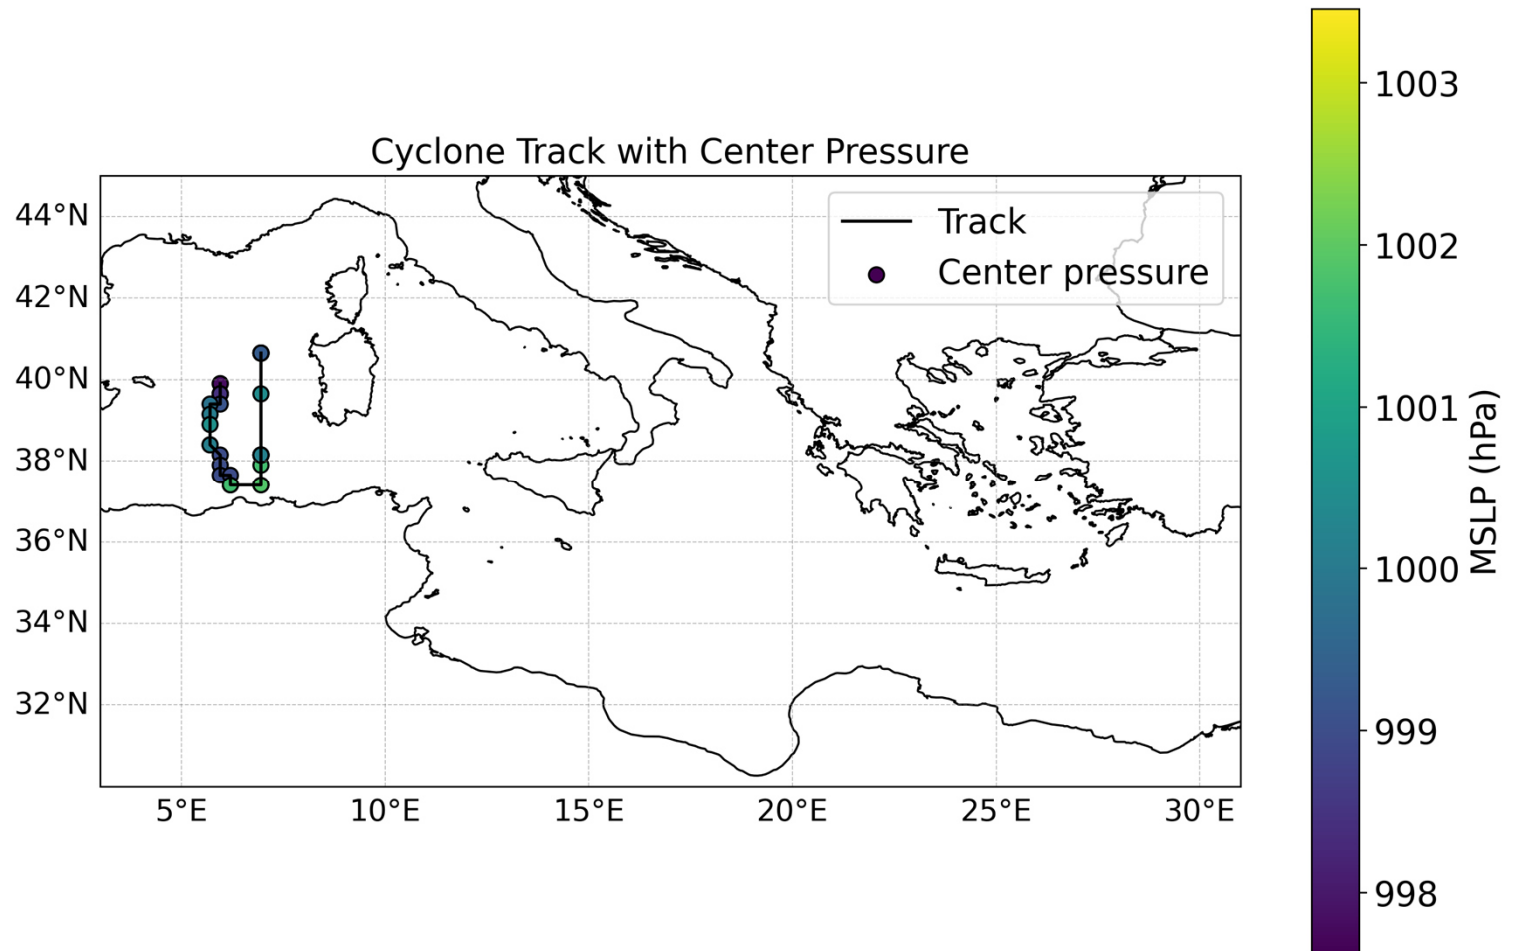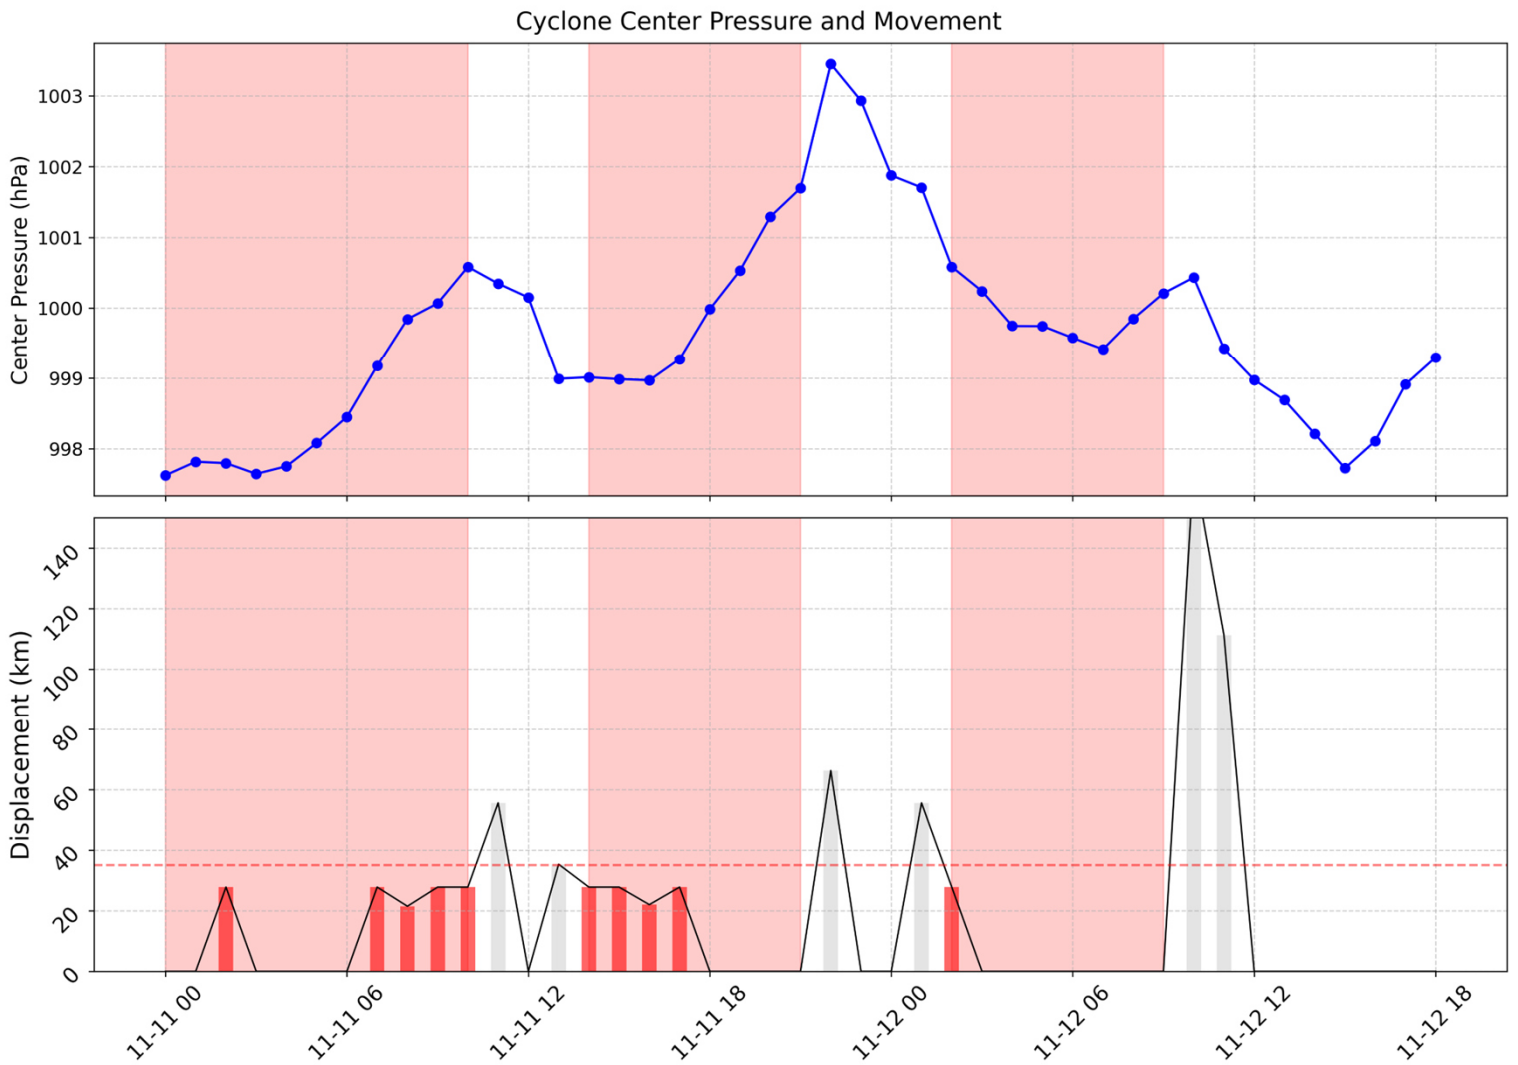

# IANOS – September 2020

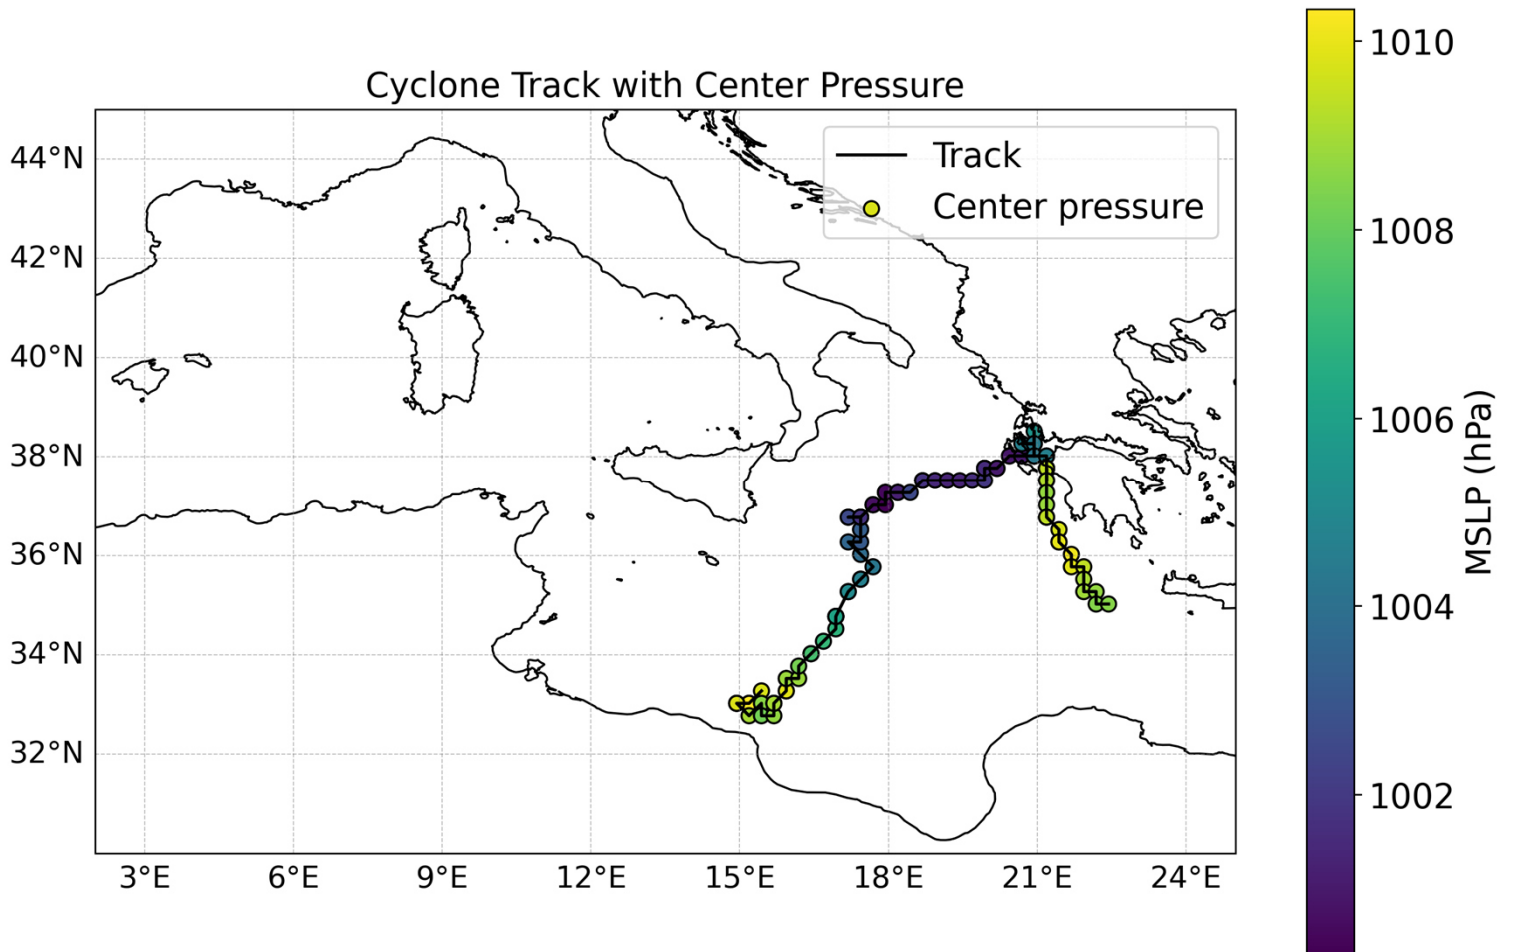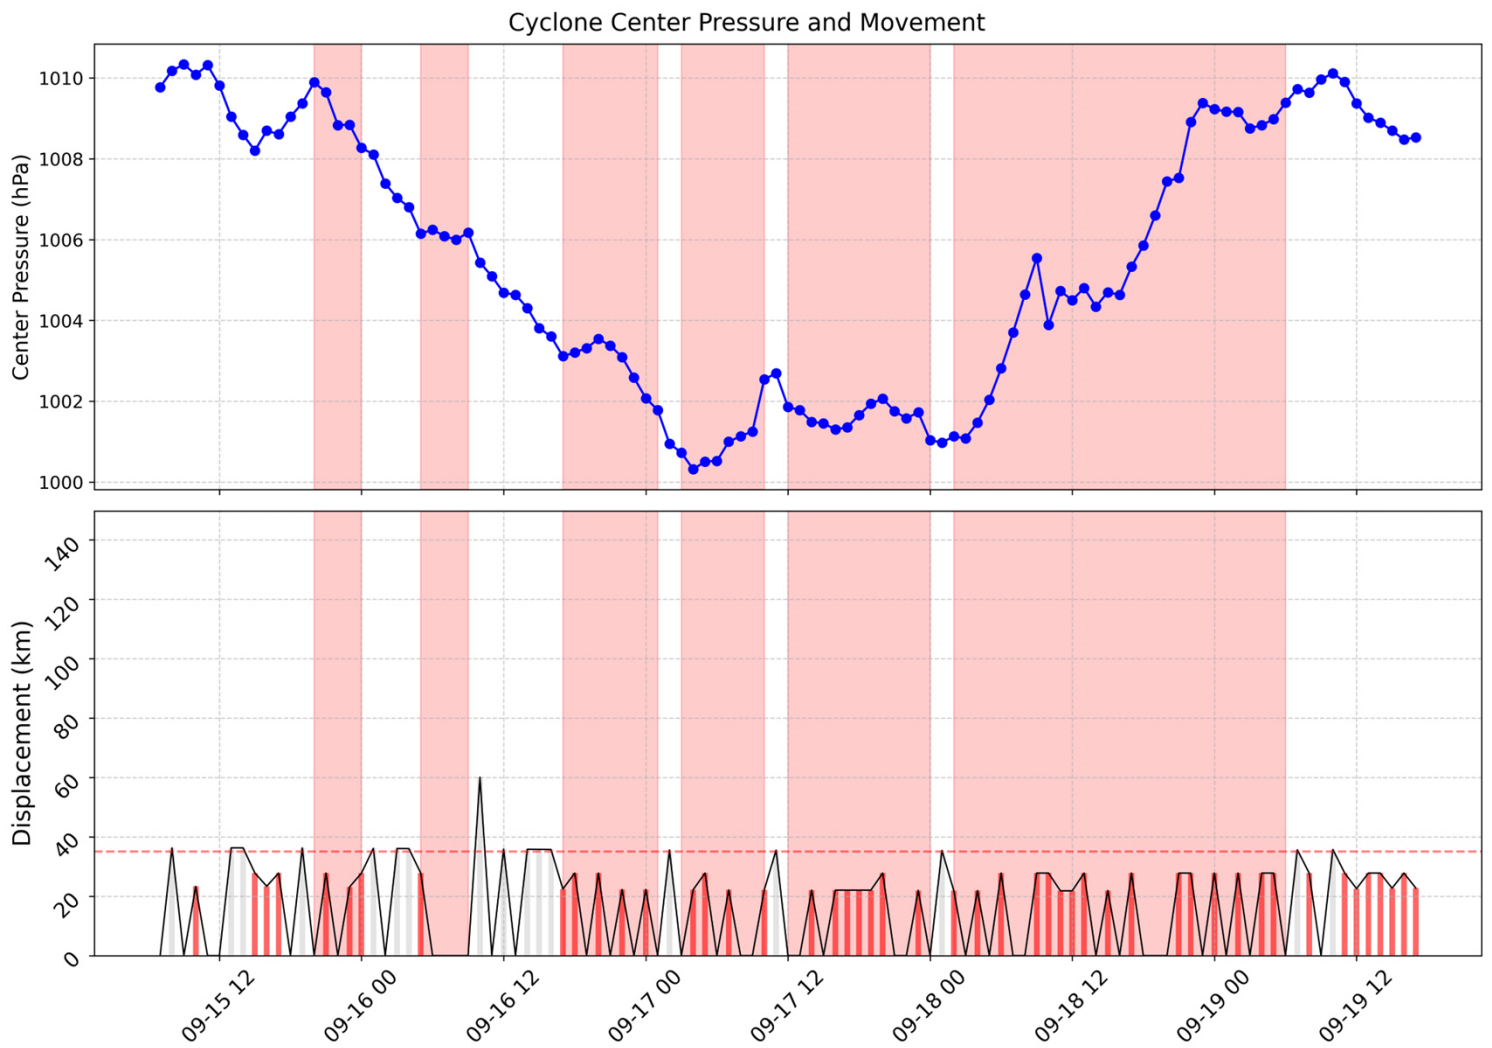

# APOLLO – October 2021

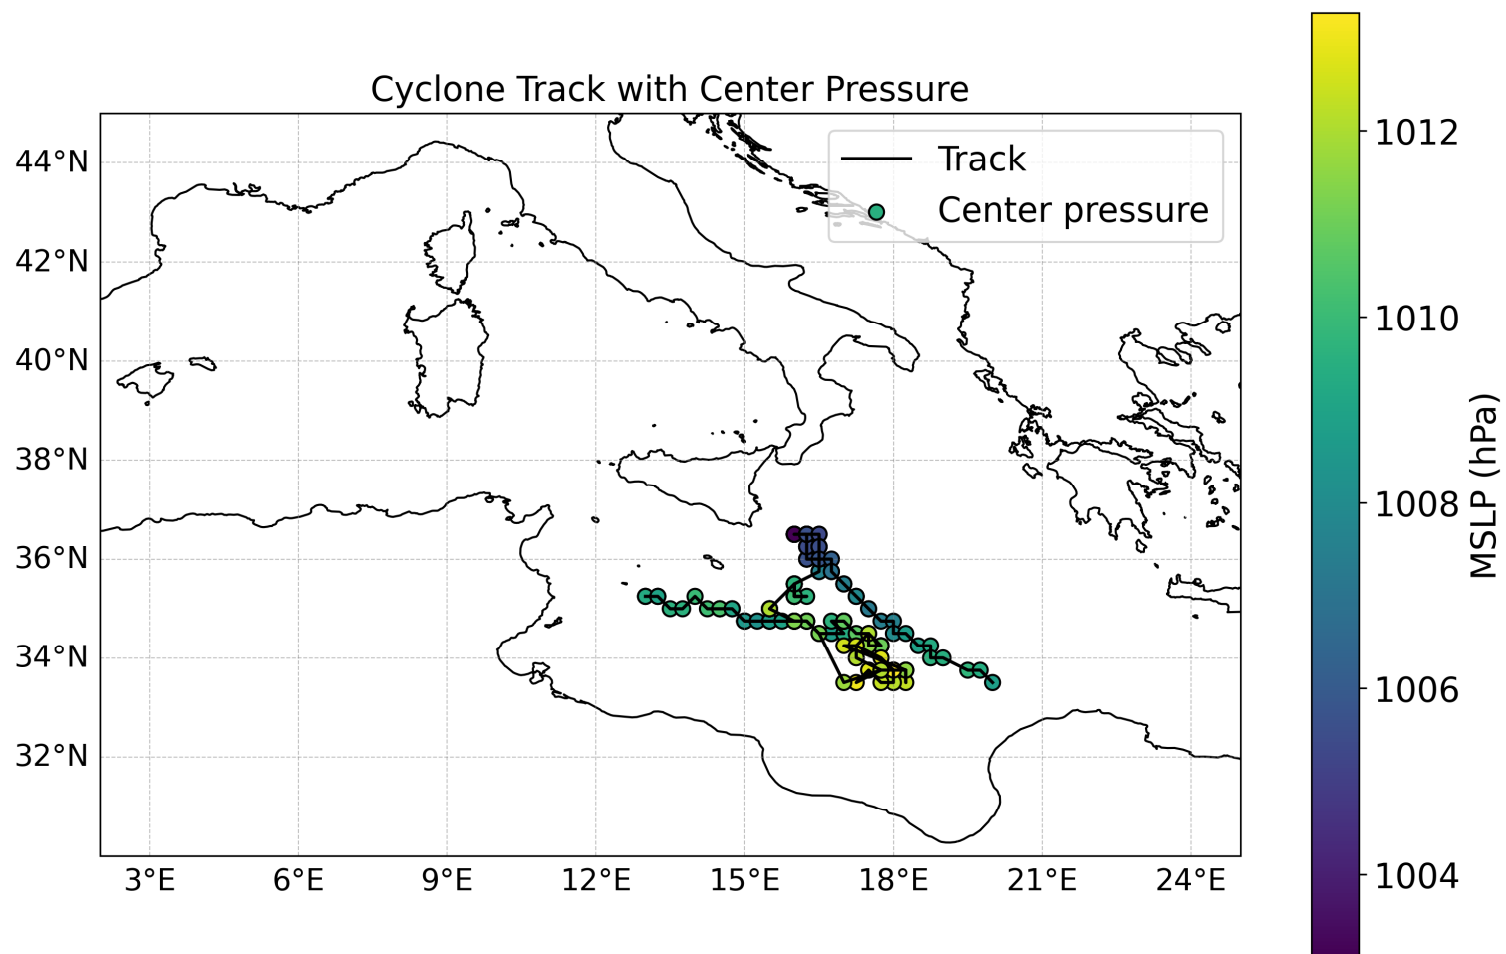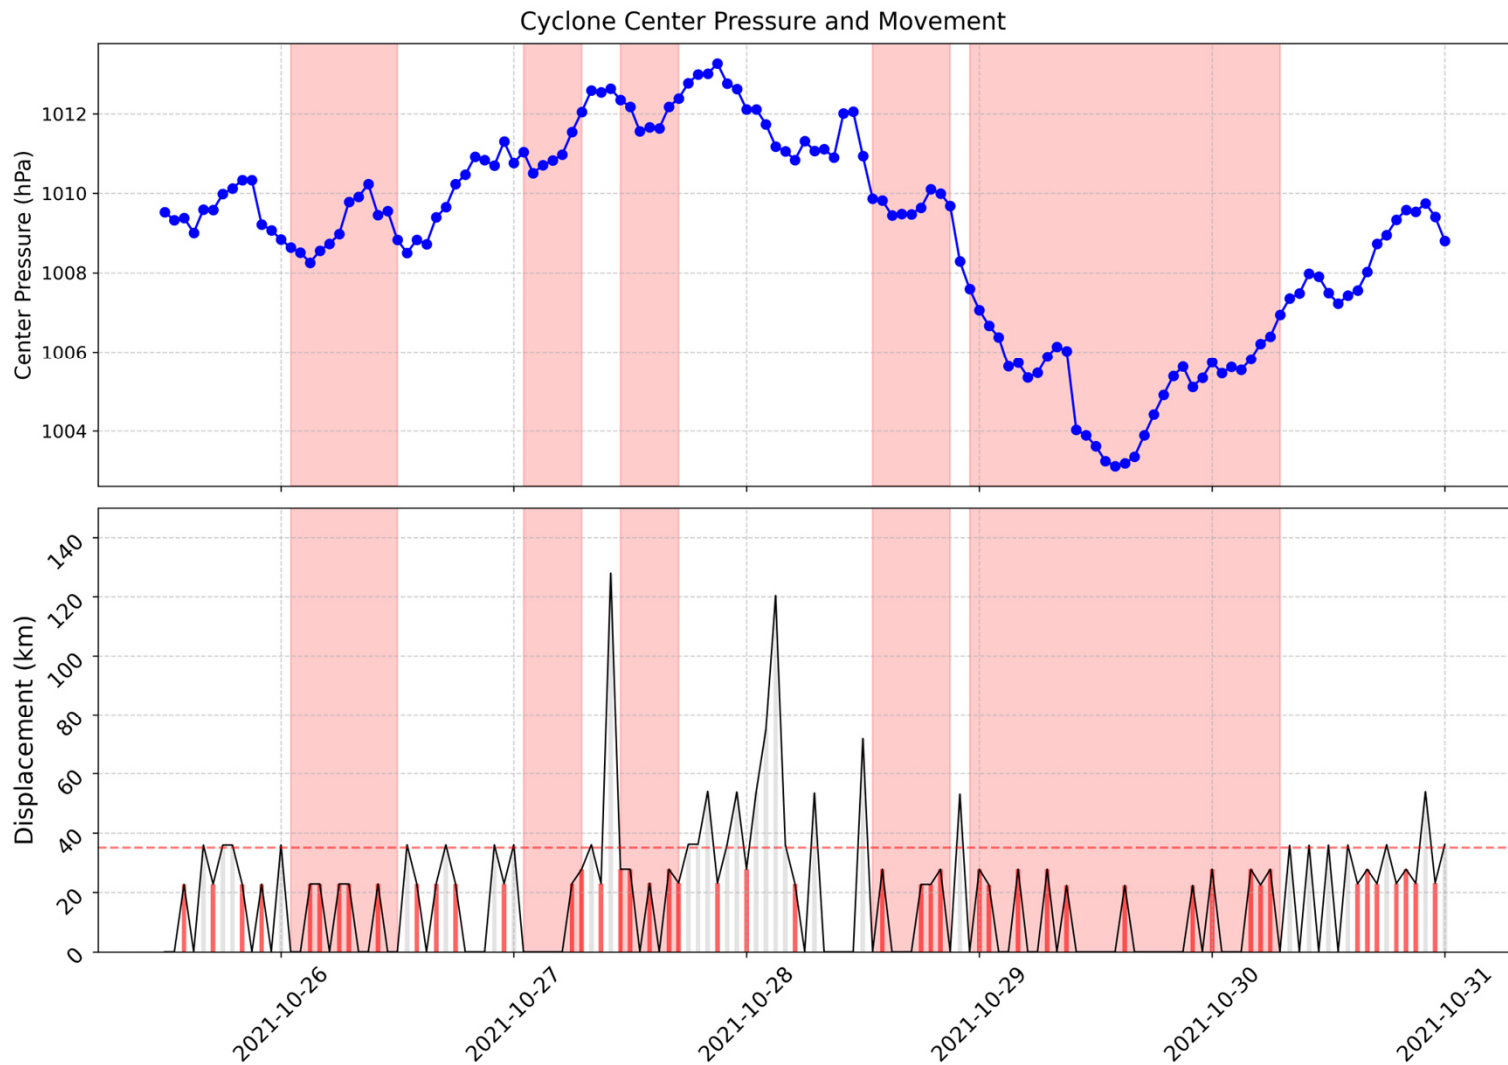

# BLAS – November 2021

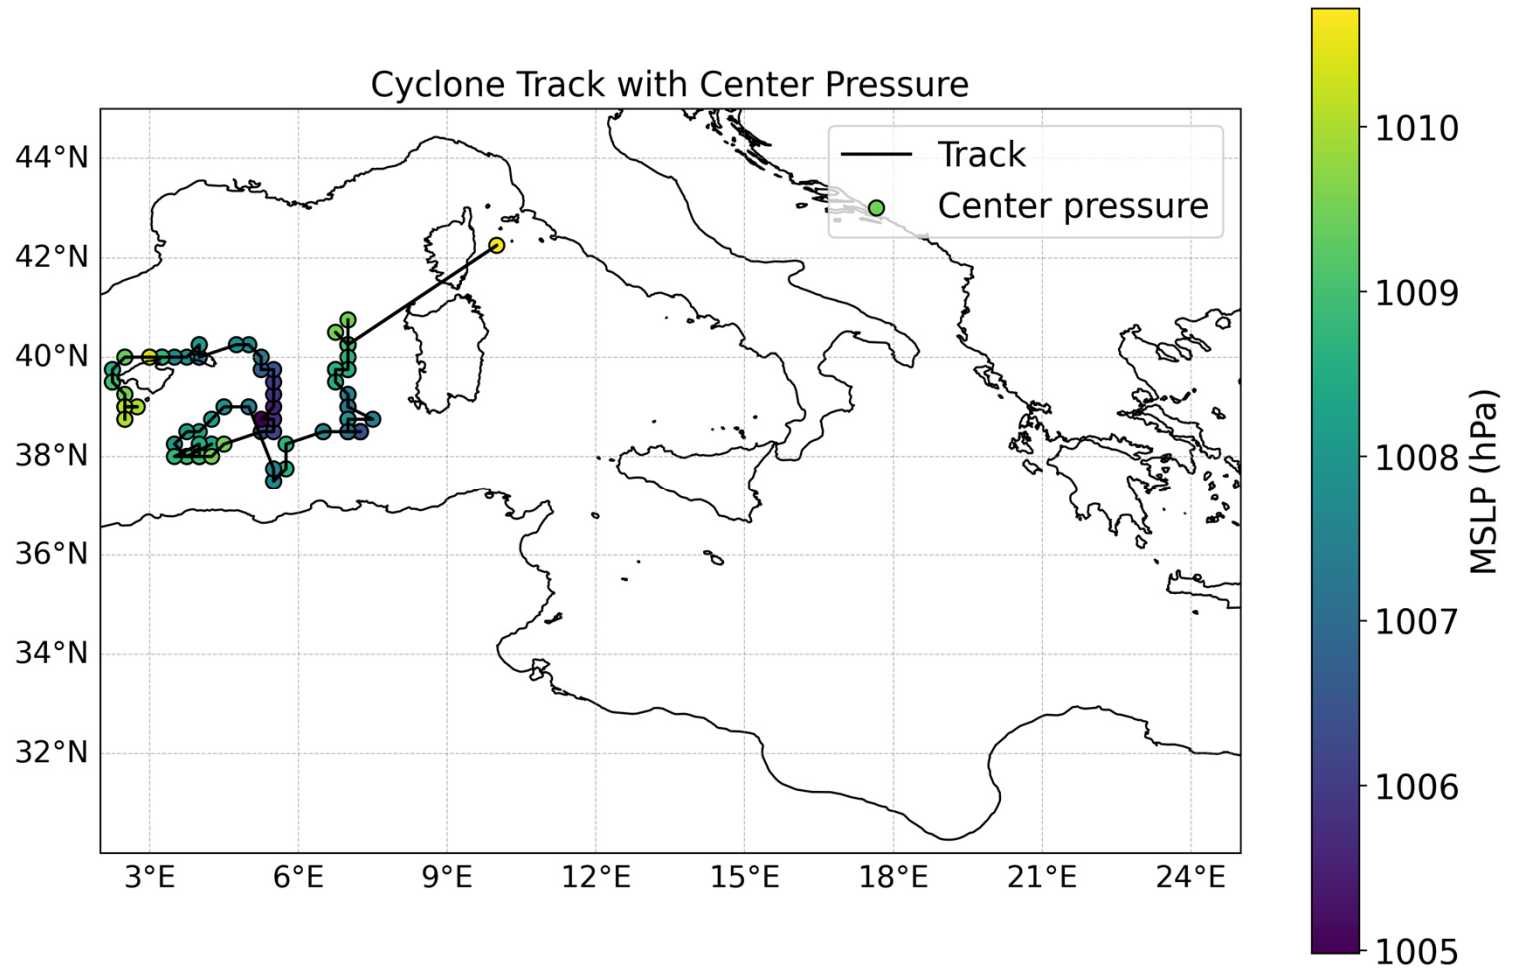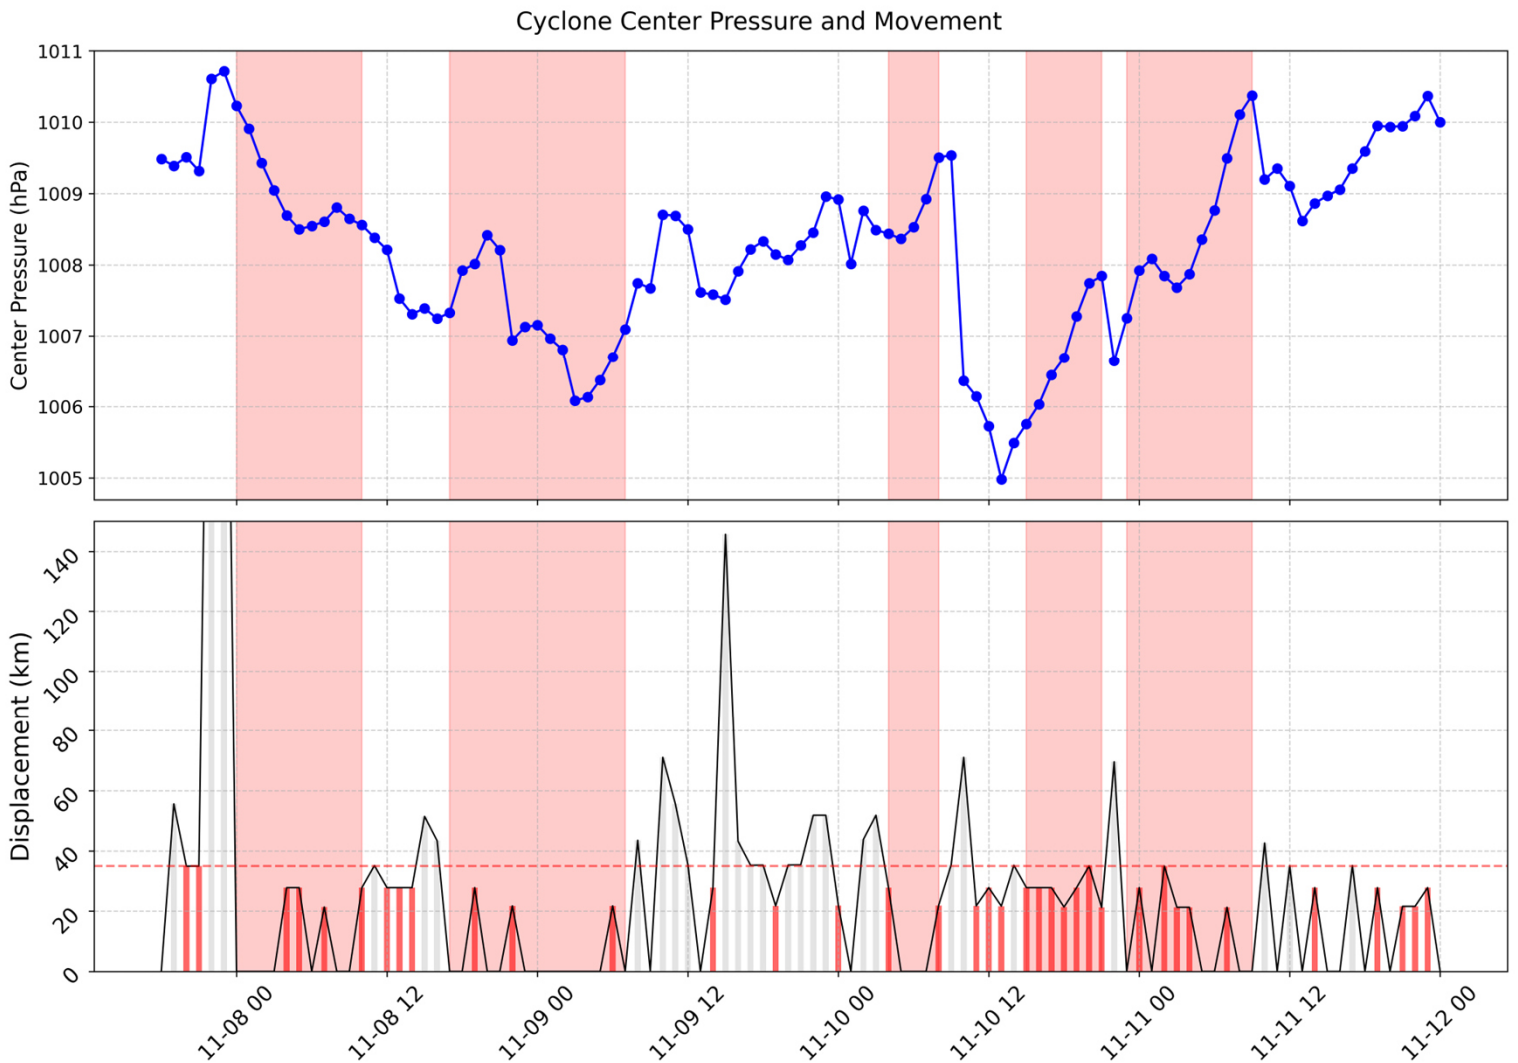

# CIPRIAN – October 2022

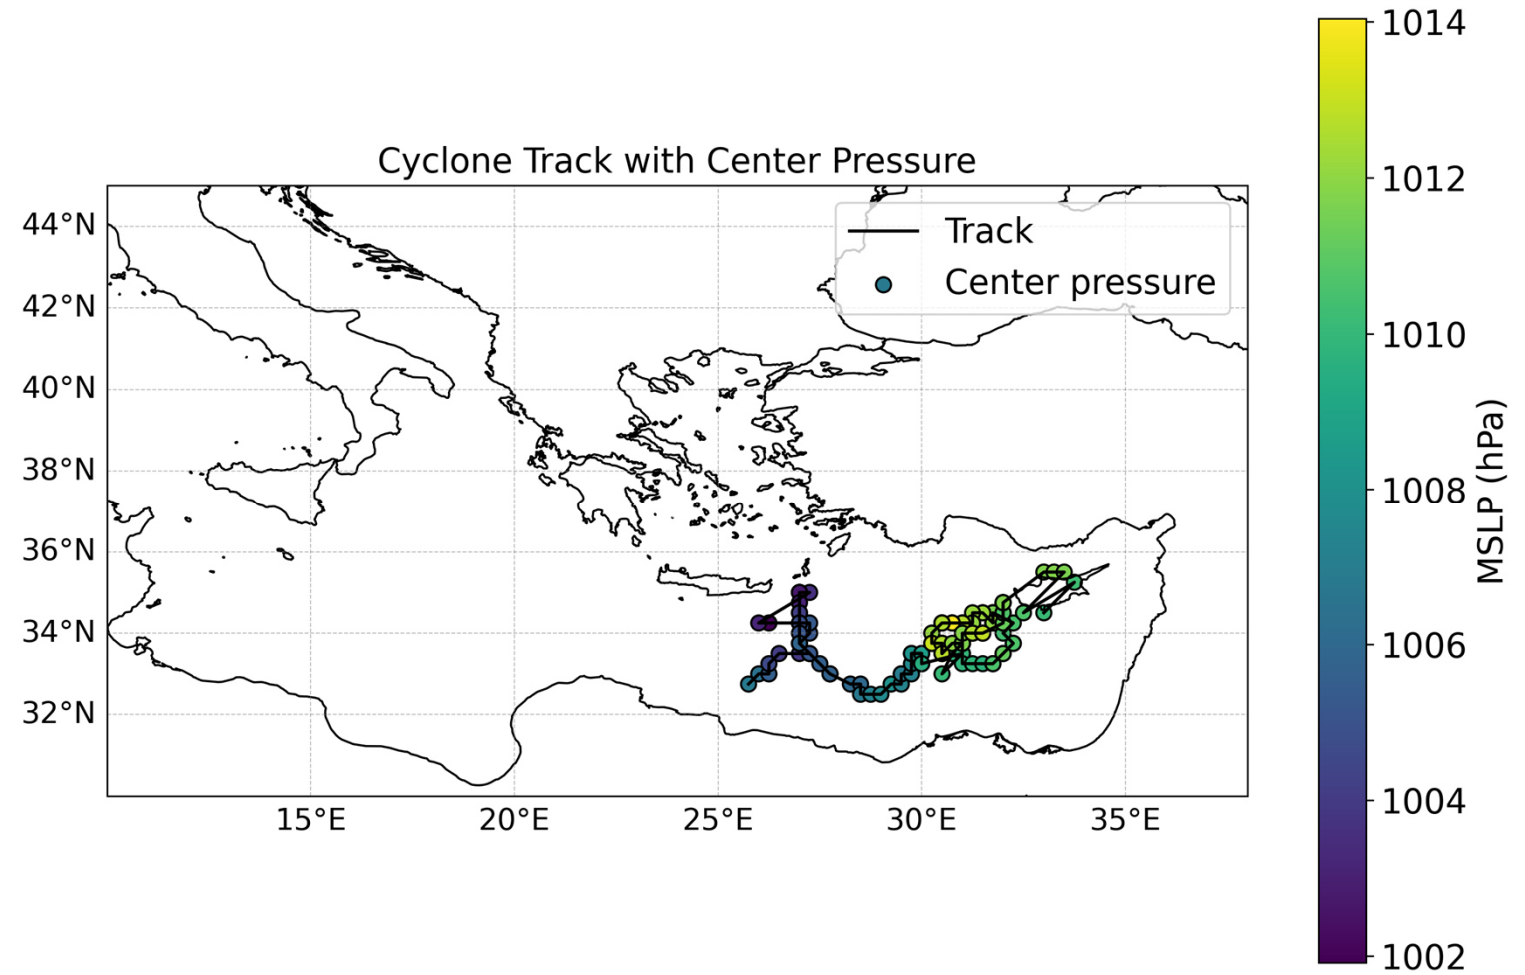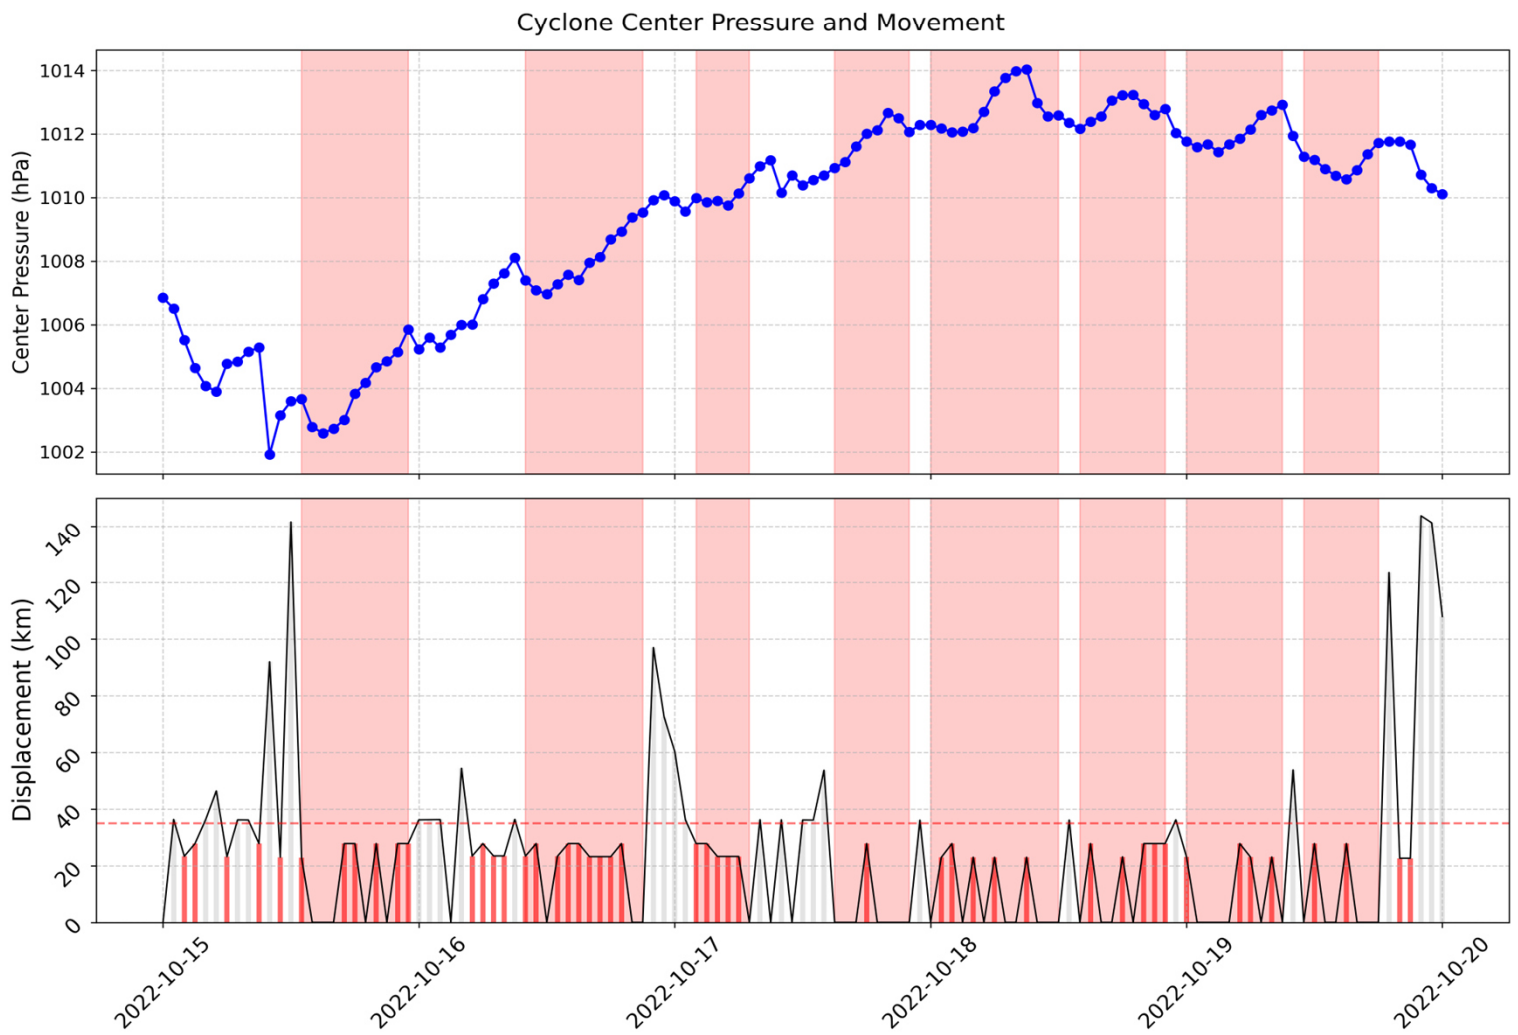

# HELIOS – February 2023

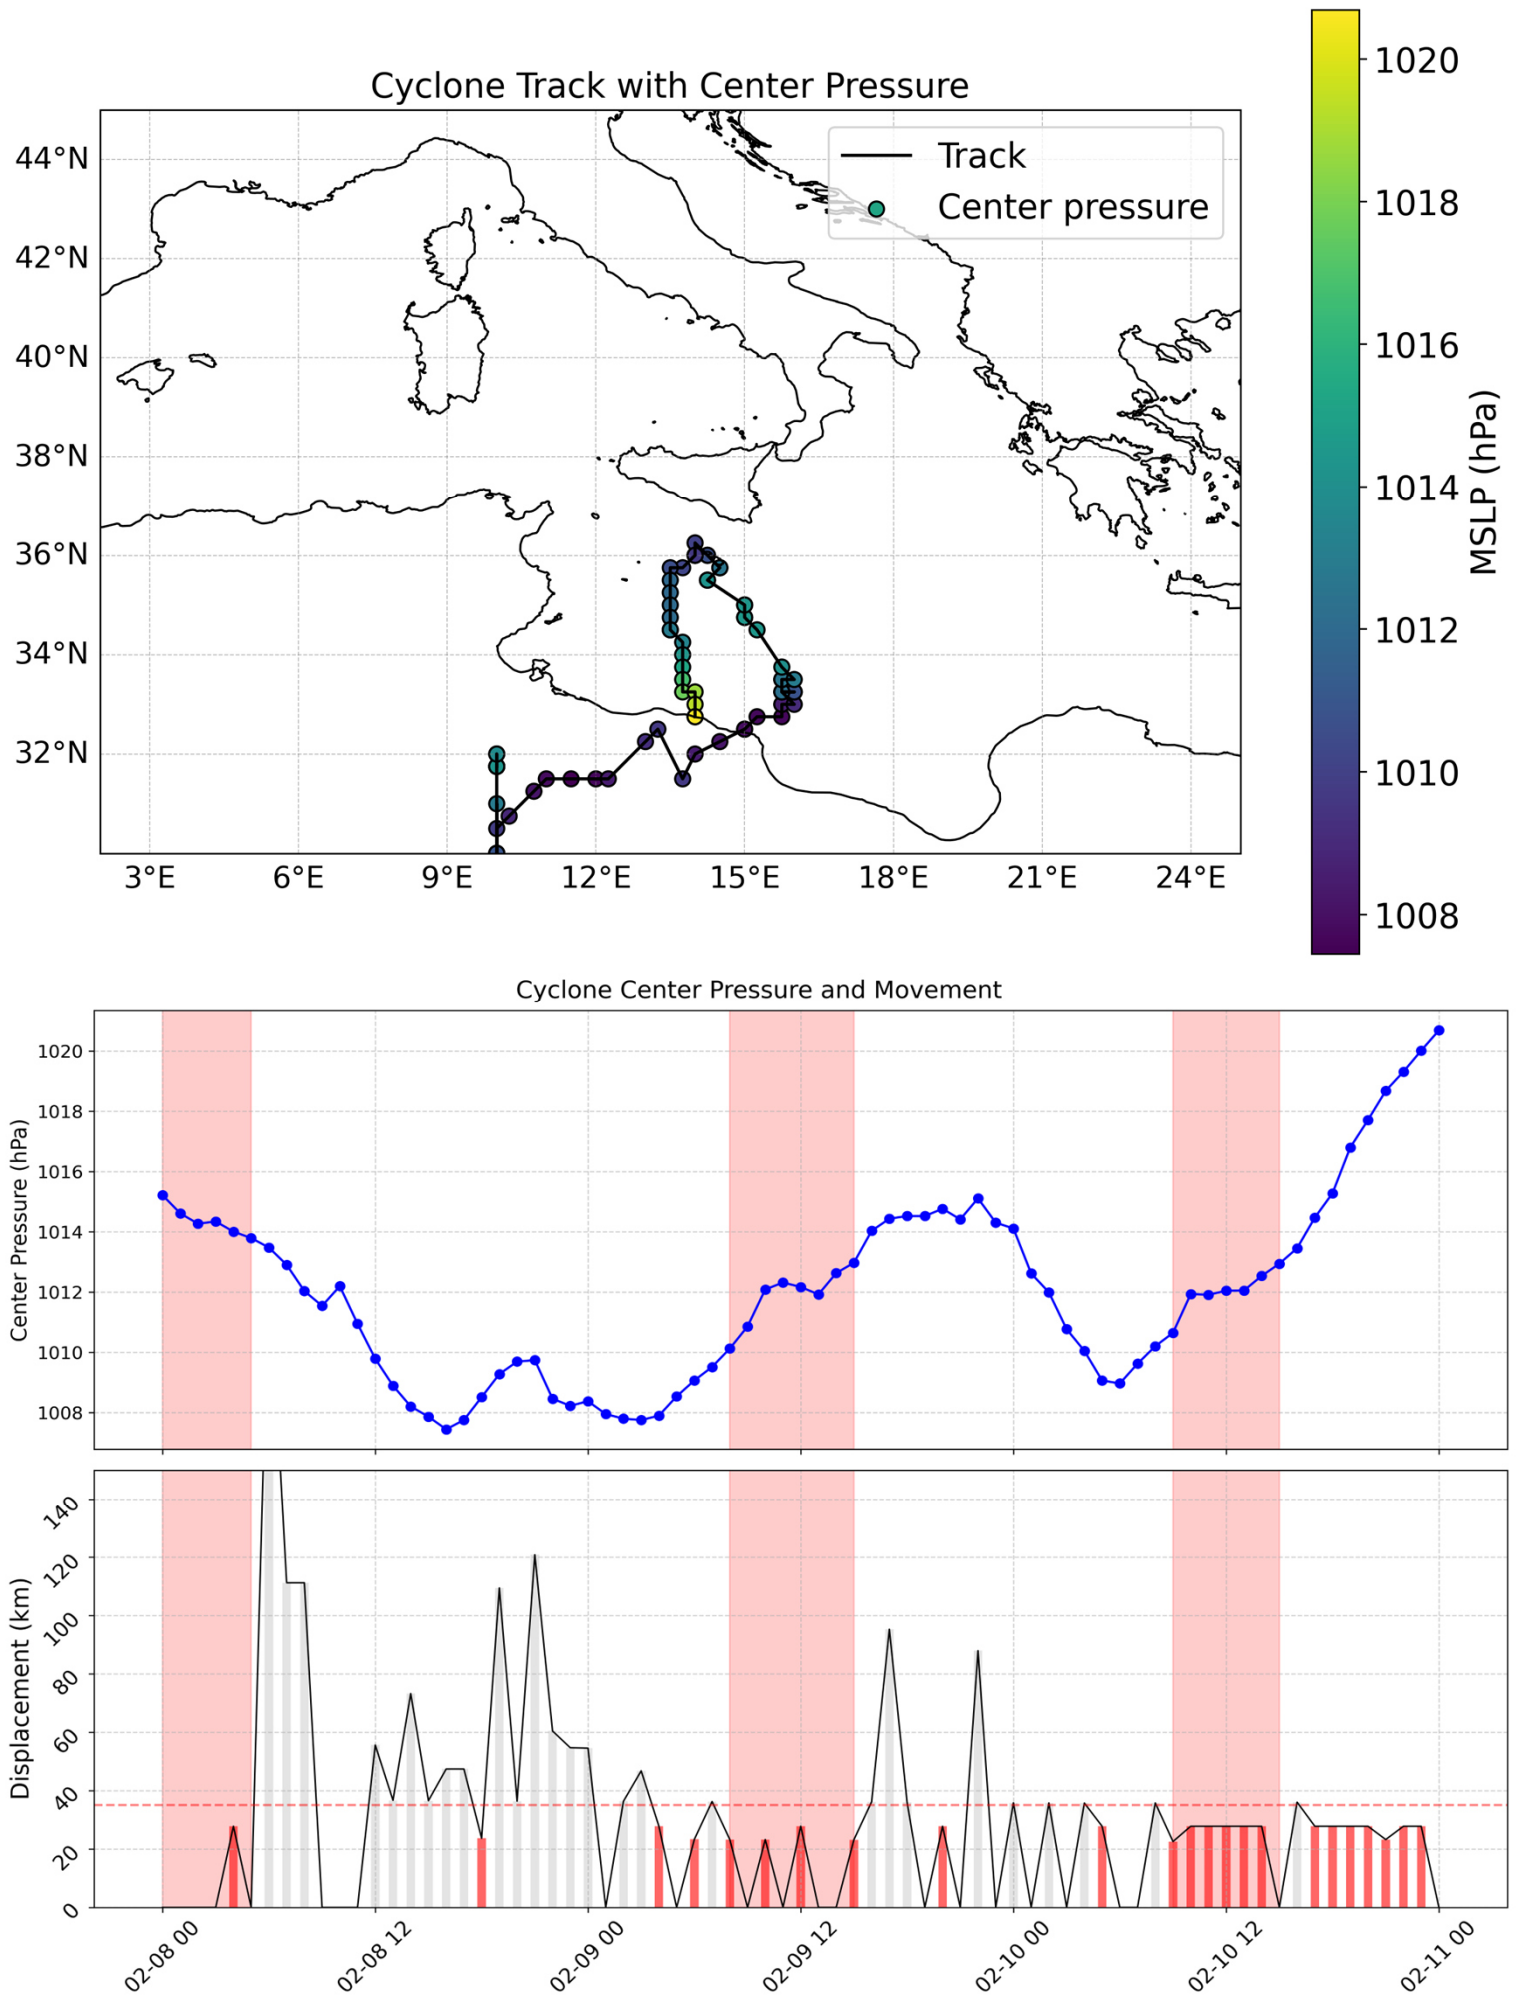

# JULIETTE – February-March 2023

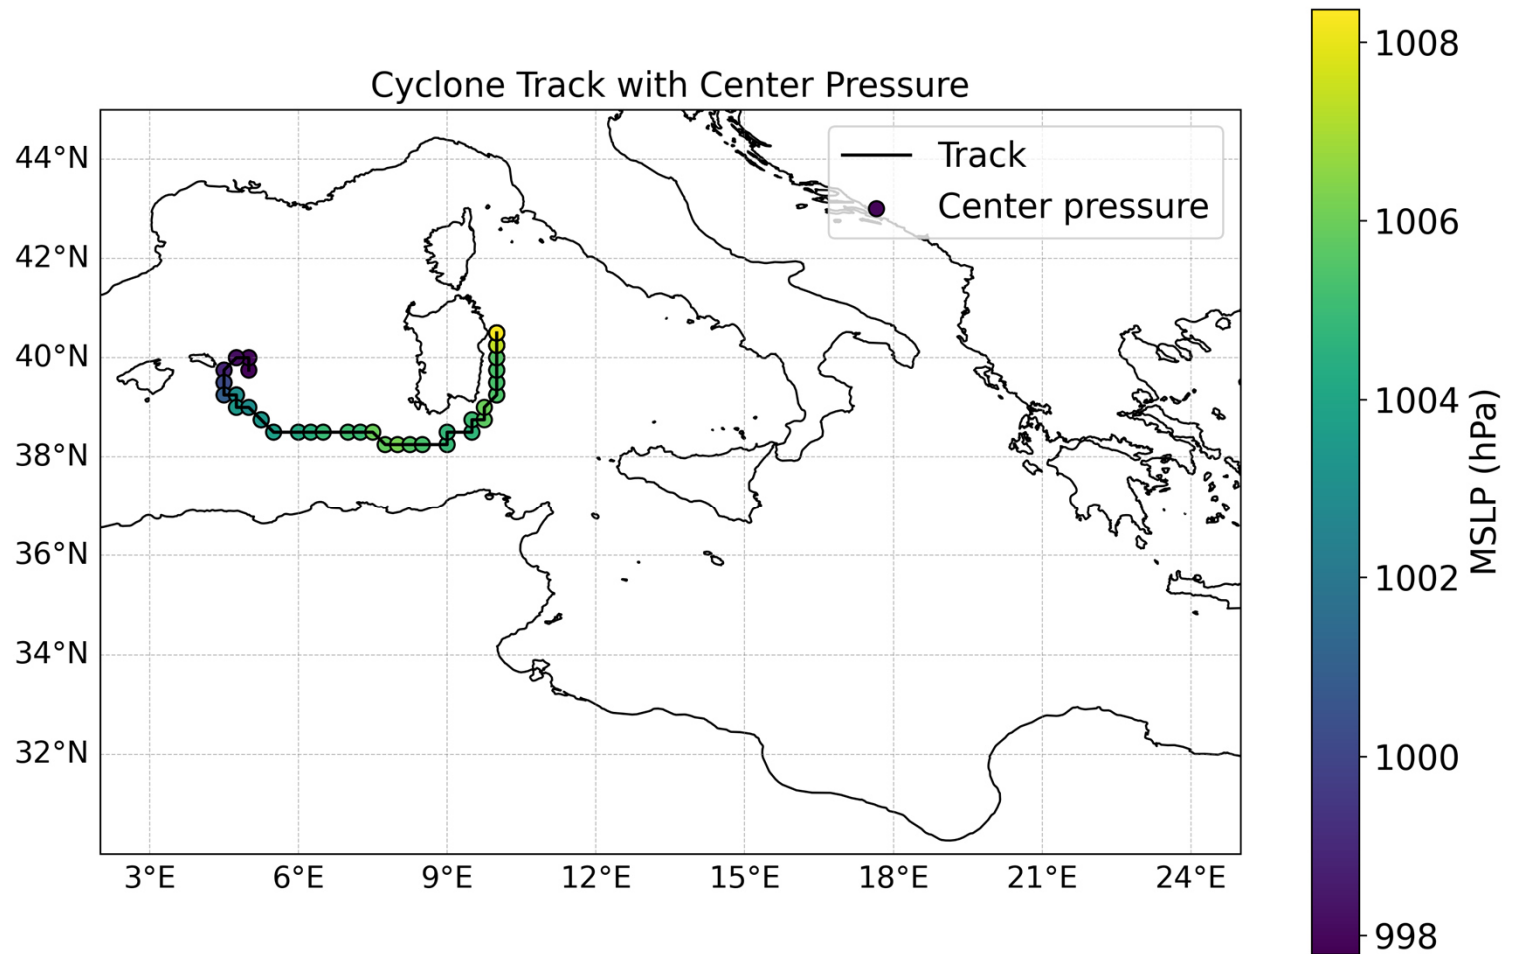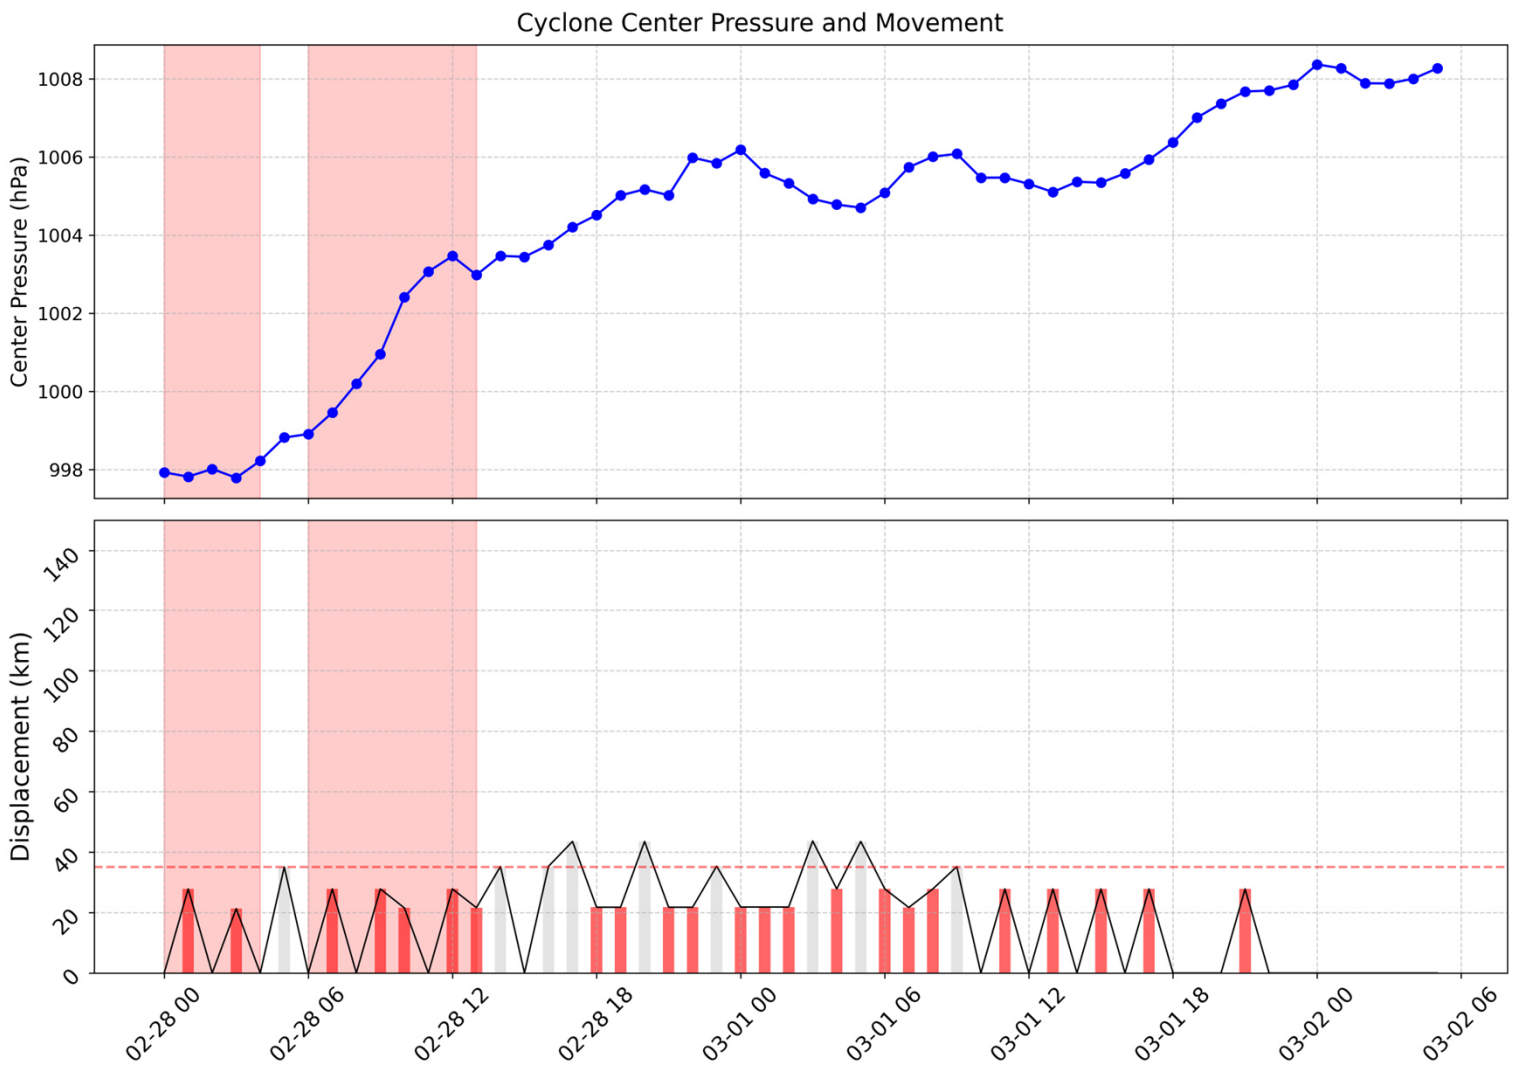

# DANIEL – September 2023

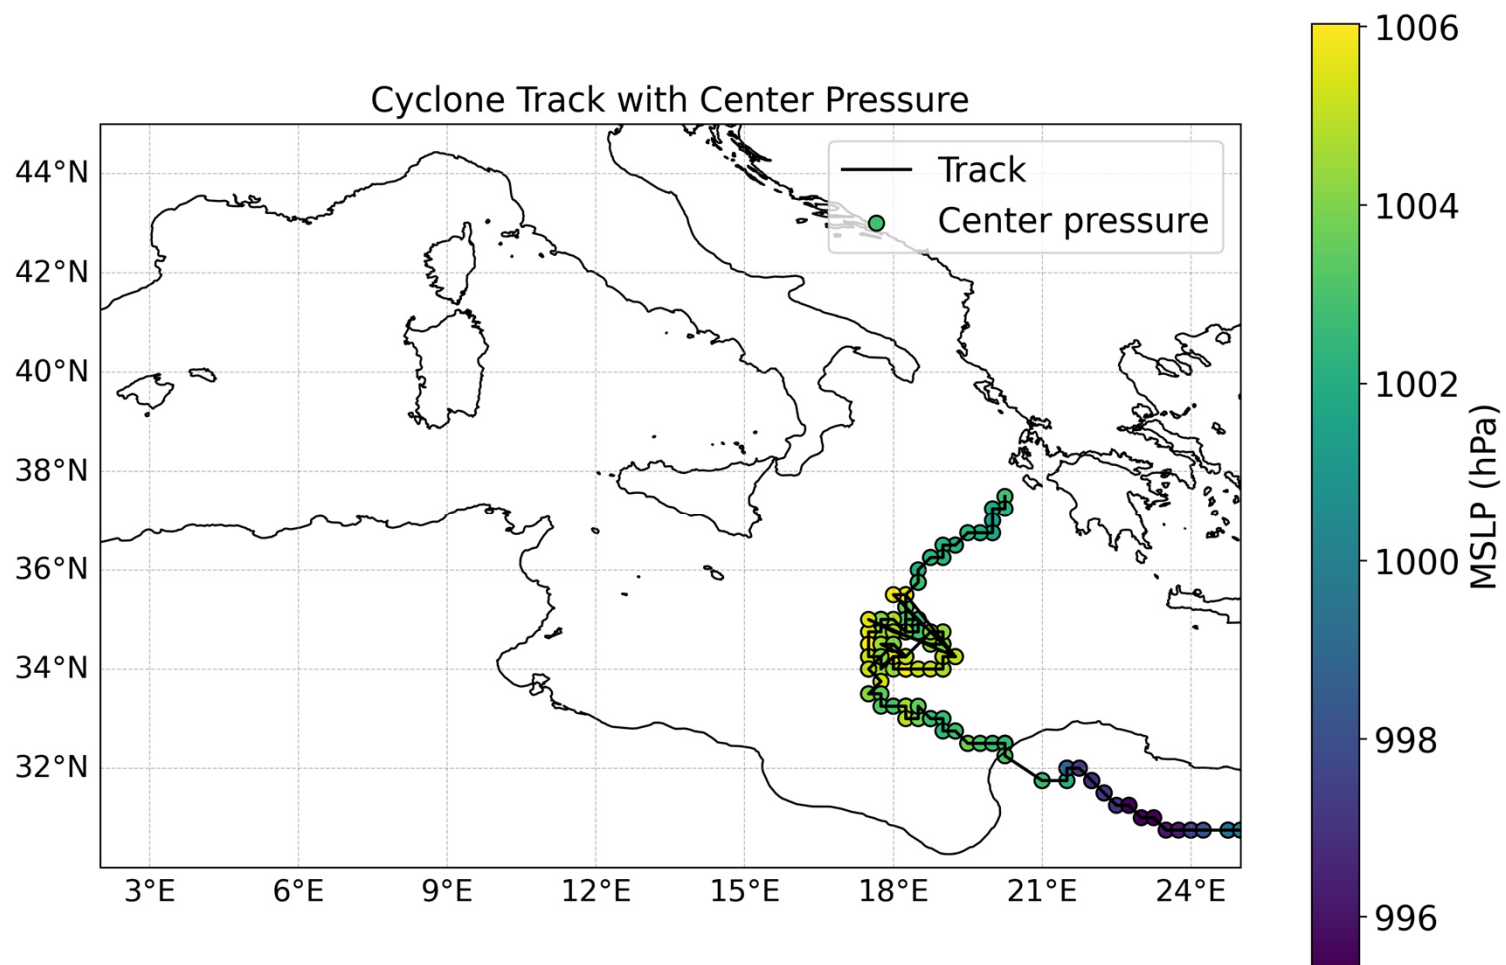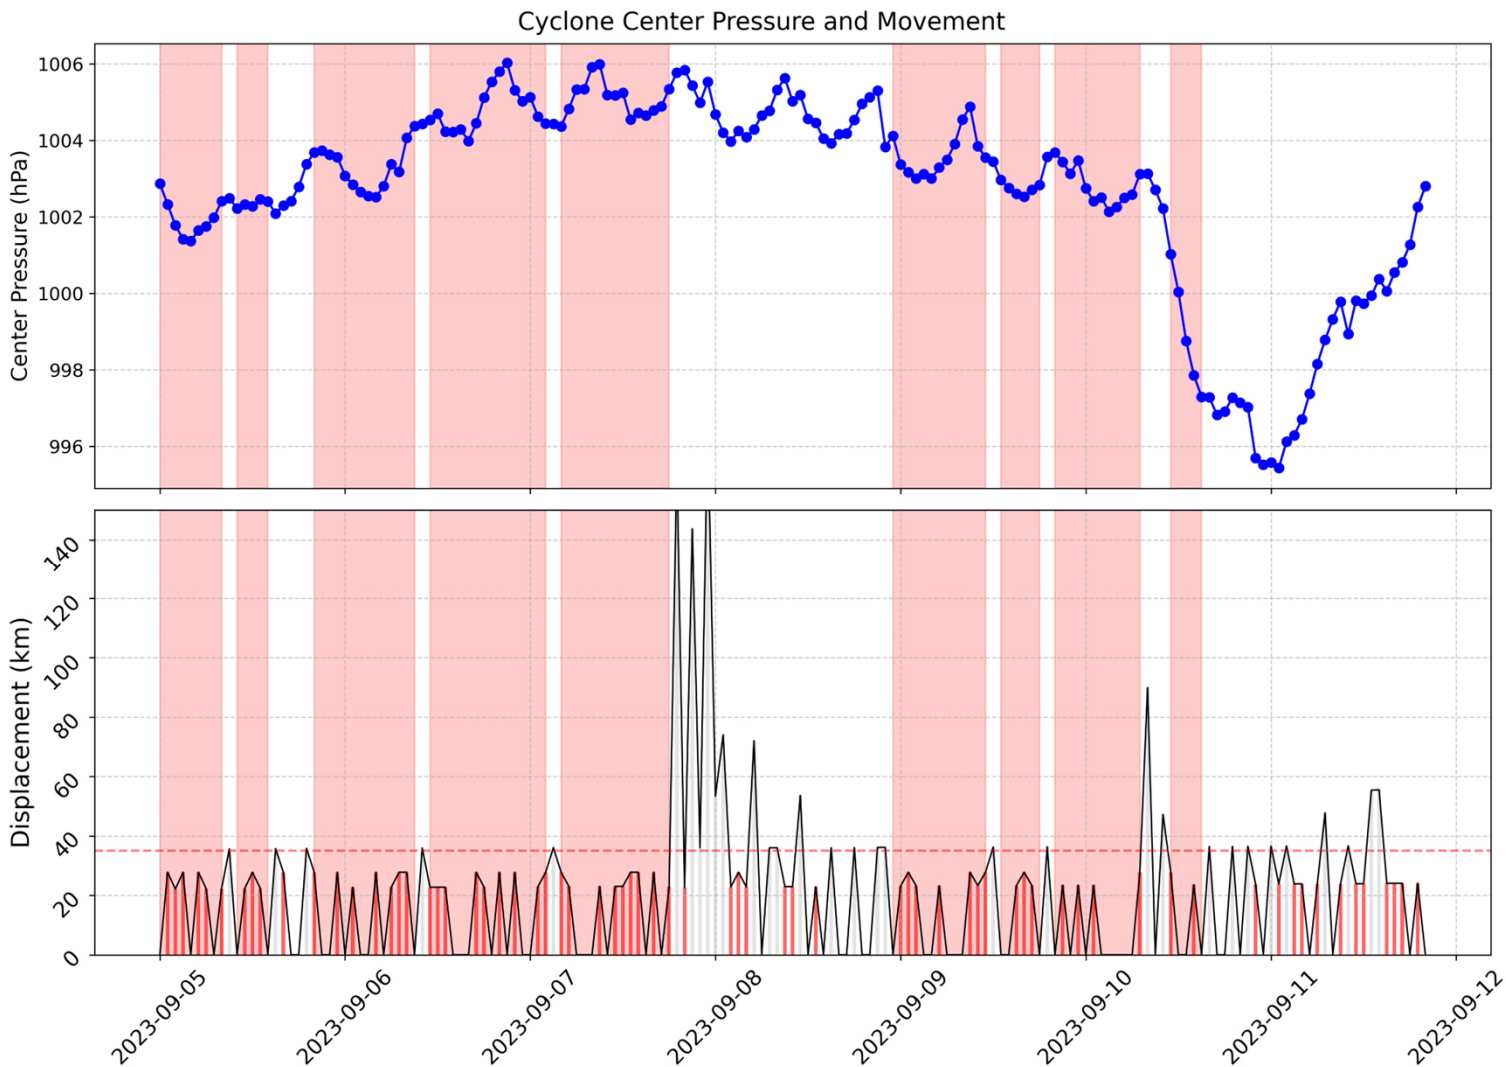

Supplement: Supplementary file 1 [file Supplementary Material S1_Slow-moving phase.pdf › Supplementary Material S1_Slow-moving phase.pdf]
