# Supplementary material for: When Storms Stir the Mediterranean Depths: Chlorophyll-a Response to Mediterranean Hurricanes
Source: Copernicus journal article supplement (doi:10.5194/egusphere-2025-3260), 2025-07-18
Supplement: Supplementary file 1 [file Supplementary Table S1.docx]

| **Cyclone** | **RMSE Chl-a (mg/m3)** | **RMSE DCM Depth (m)** |
| --- | --- | --- |
| Xandra-2014 | 0.062395 | 0.28 |
| Erik-2015 | 0.154434 | 0.292 |
| Zorbas-2018 | 0.075327 | 0.3 |
| Vaia-2018 | 0.152952 | 0.271 |
| Ianos-2020 | 0.12091 | 1.201 |
| Blas-2021 | 0.044008 | 1.571 |
| Daniel-2023 | 0.035664 | 0.287 |

*Supplementary Table S1 – RMSE assessements for Chl-a and DCM depth assessed from Copernicus reanalysis and ARGO Float observations.*
