# Supplementary material for: When Storms Stir the Mediterranean Depths: Chlorophyll-a Response to Mediterranean Hurricanes
Source: Copernicus journal article supplement (doi:10.5194/egusphere-2025-3260), 2025-07-18
Supplement: Supplementary file 3 [file Supplementary Material S3_Total Energy from sea water.pdf › Supplementary Material S3_Total Energy from sea water.pdf]

TOTAL ENERGY ASSESSED FROM SURFACE DOWNWARD HEAT FLUX AT SEA SURFACE

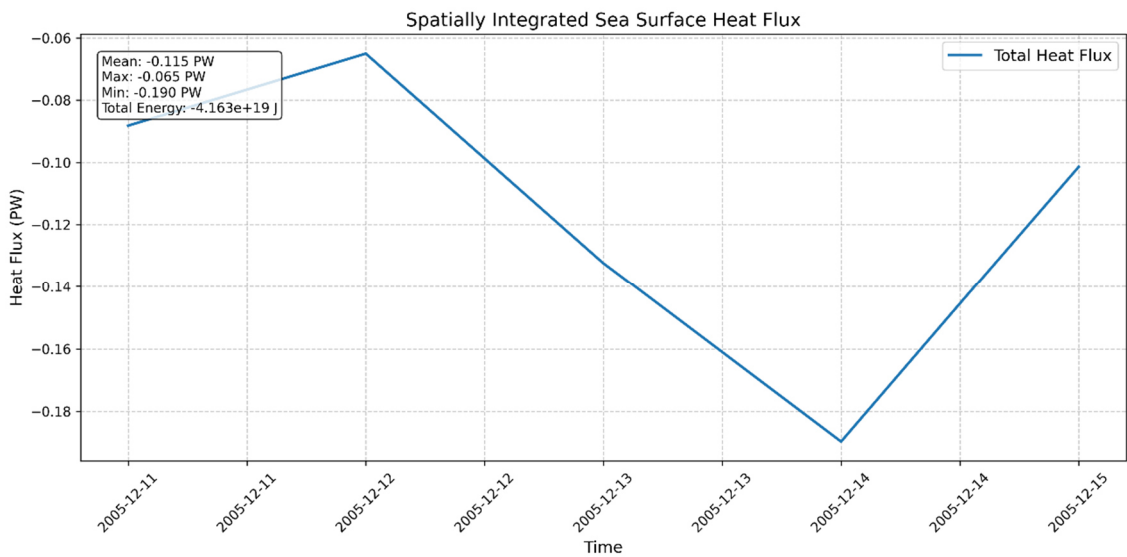

Fig. S3.1 – Spatially integrated Sea Surface Heat Flux assessed for the medicane Zeo.

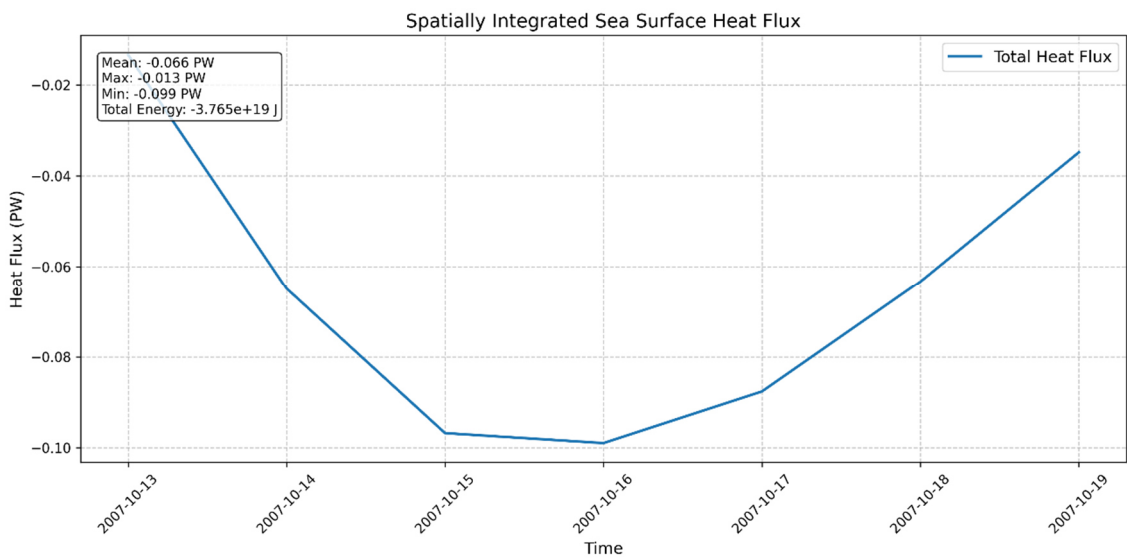

Fig. S3.2 – Spatially integrated Sea Surface Heat Flux assessed for the cyclone Janet.

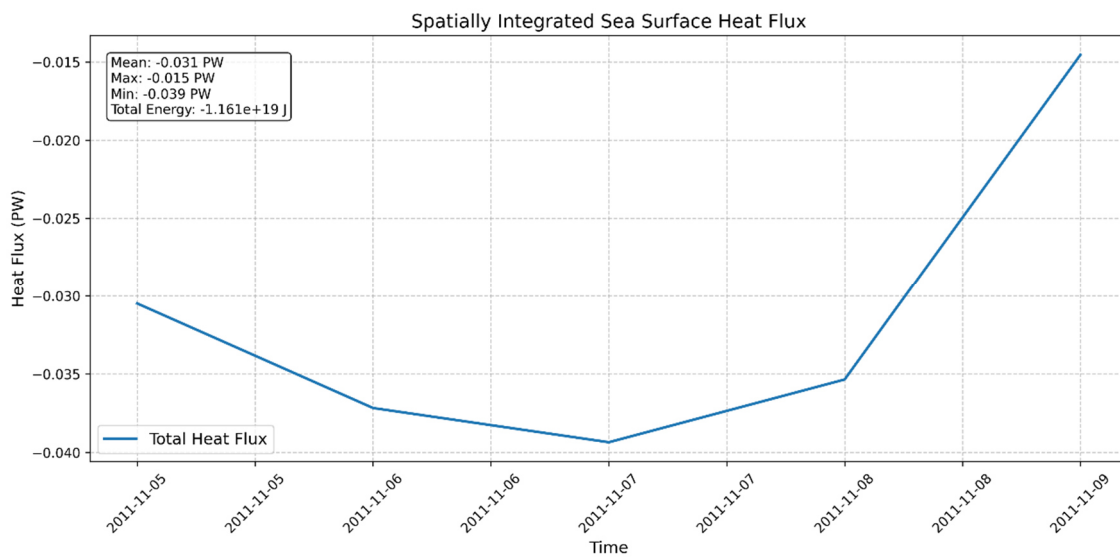

Fig. S3.3 – Spatially integrated Sea Surface Heat Flux assessed for the medicane Rolf.

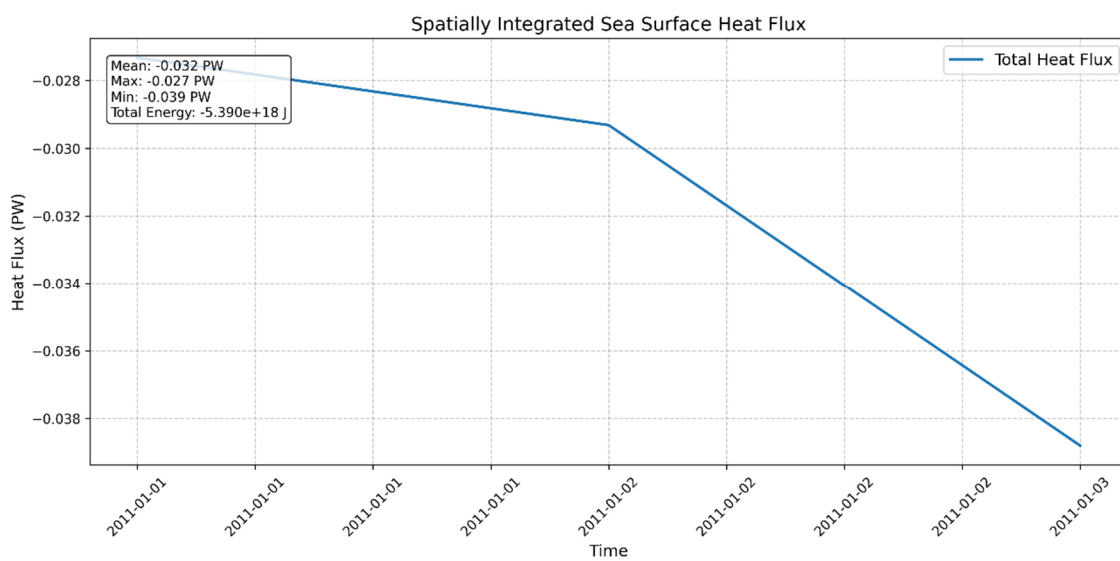

Fig. S3.4 – Spatially integrated Sea Surface Heat Flux assessed for the cyclone Akle.

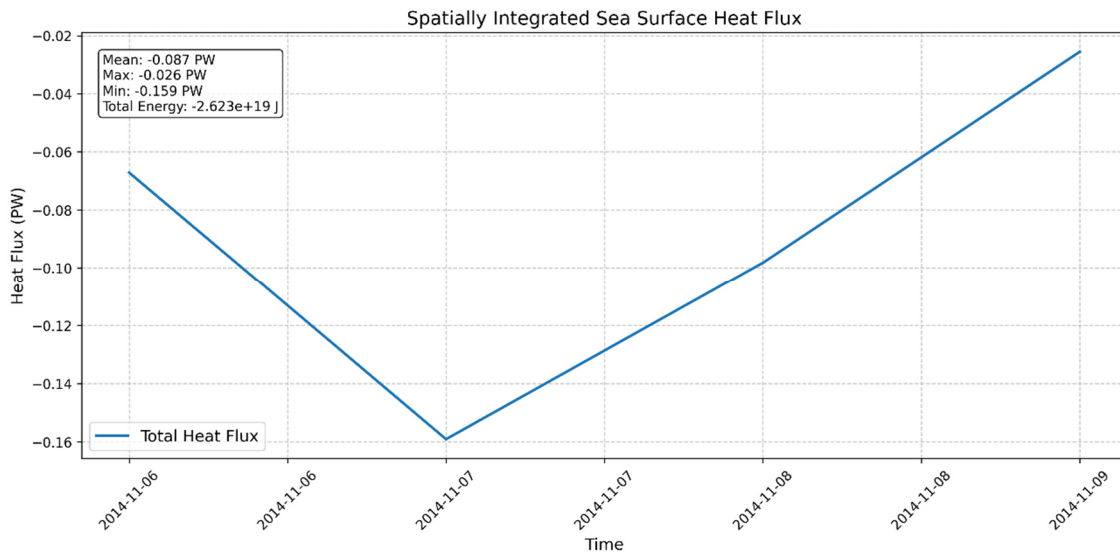

Fig. S3.5 – Spatially integrated Sea Surface Heat Flux assessed for the medicane Qendresa.

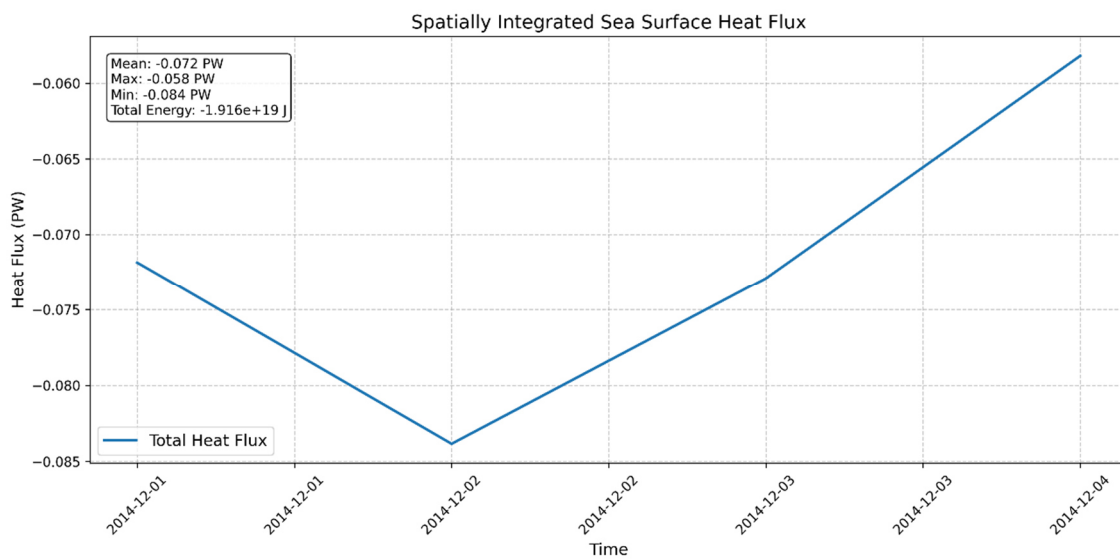

Fig. S3.6 – Spatially integrated Sea Surface Heat Flux assessed for the cyclone Xandra.

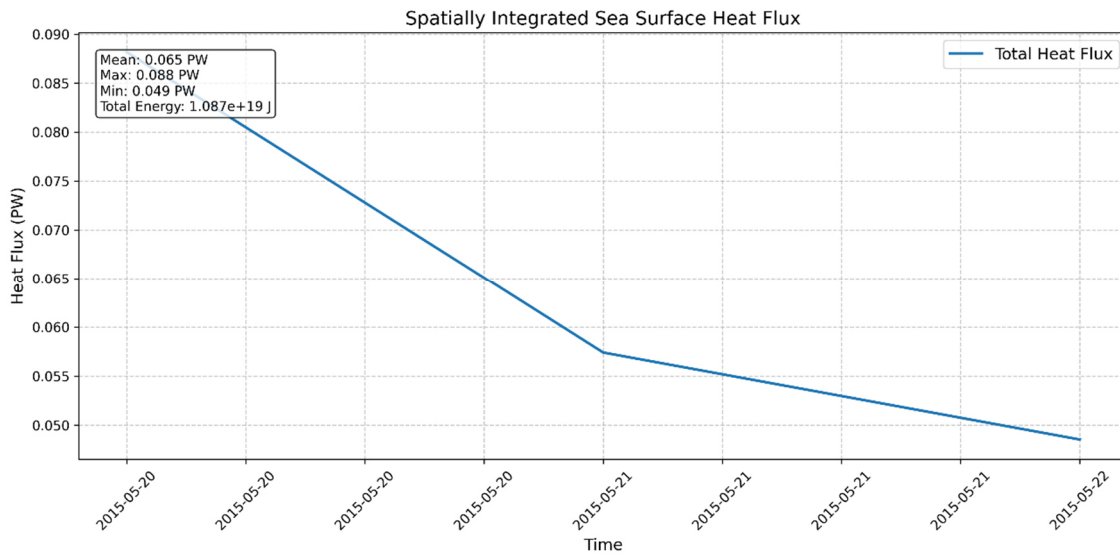

Fig. S3.7 – Spatially integrated Sea Surface Heat Flux assessed for the cyclone Erik.

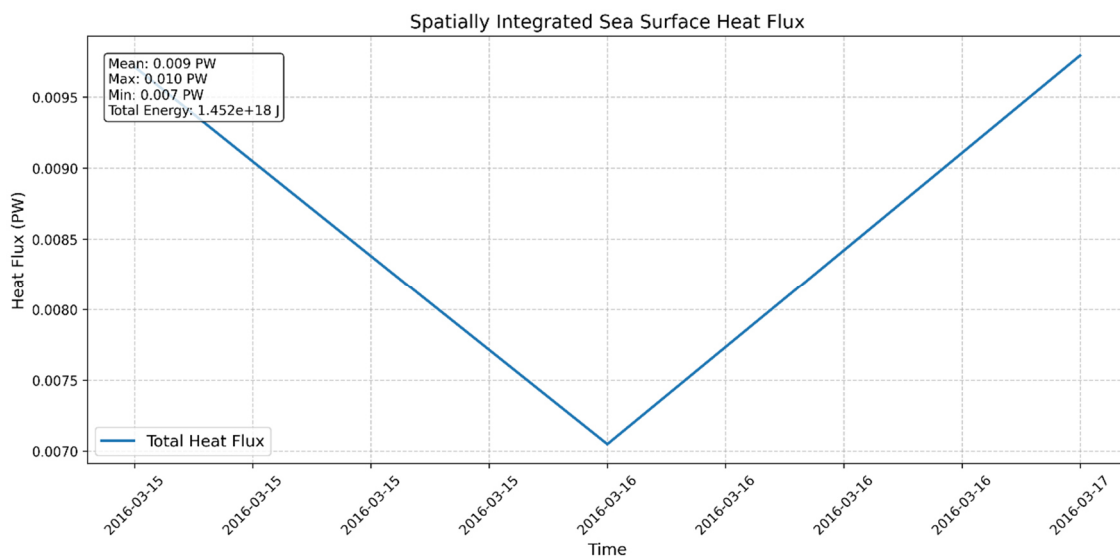

Fig. S3.8 – Spatially integrated Sea Surface Heat Flux assessed for the cyclone Caulonia.

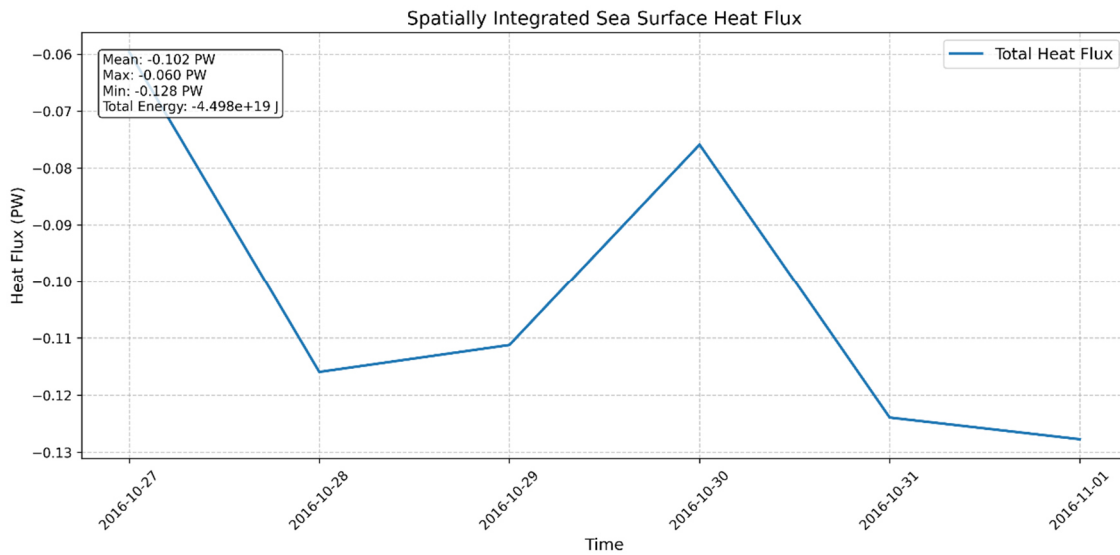

Fig. S3.9 – Spatially integrated Sea Surface Heat Flux assessed for the medicane Trixie.

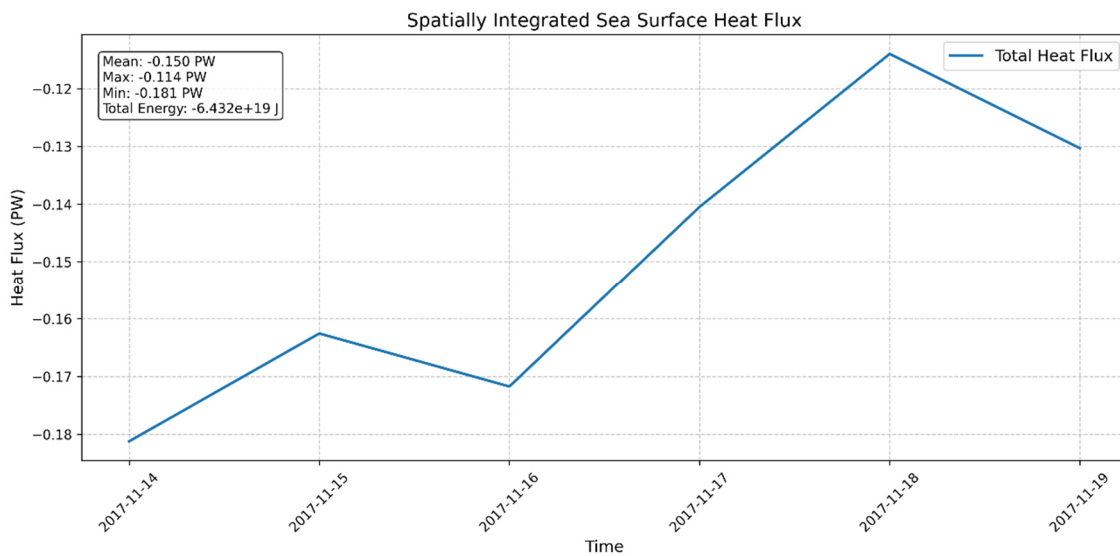

Fig. S3.10 – Spatially integrated Sea Surface Heat Flux assessed for the medicane Numa.

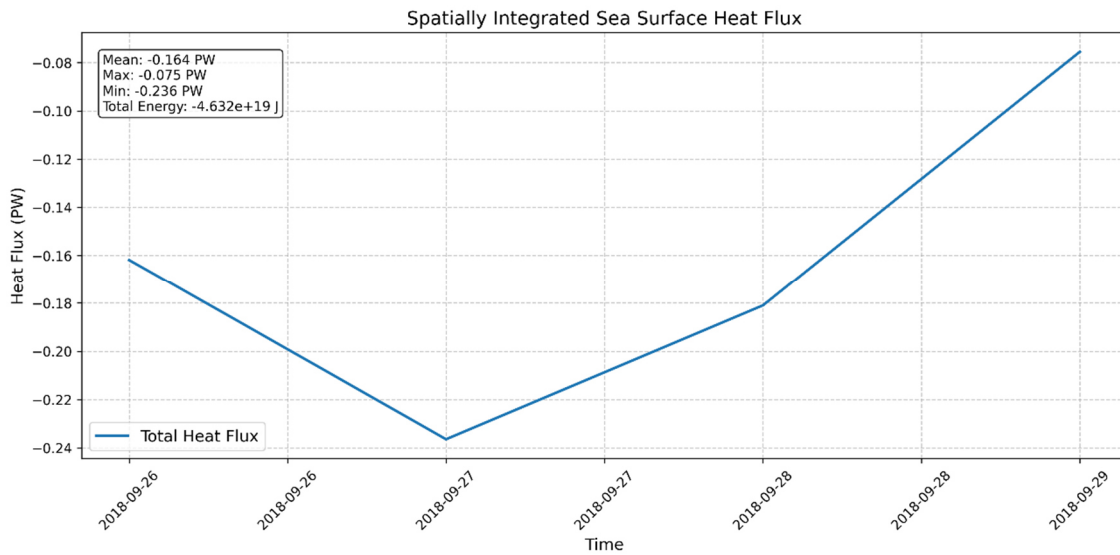

Fig. S3.11 – Spatially integrated Sea Surface Heat Flux assessed for the medicane Zorbas.

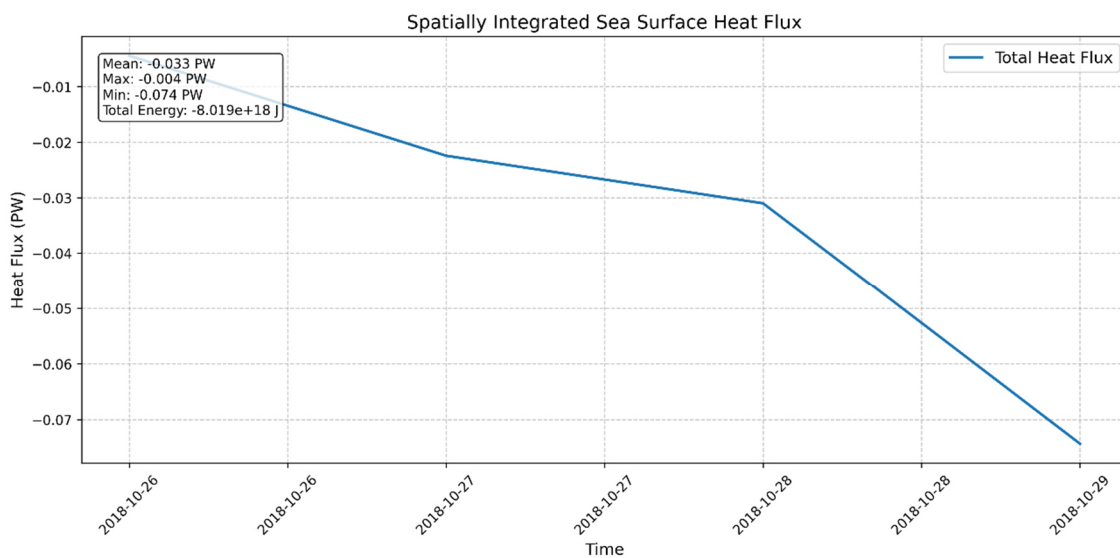

Fig. S3.12 – Spatially integrated Sea Surface Heat Flux assessed for the cyclone Vaia.

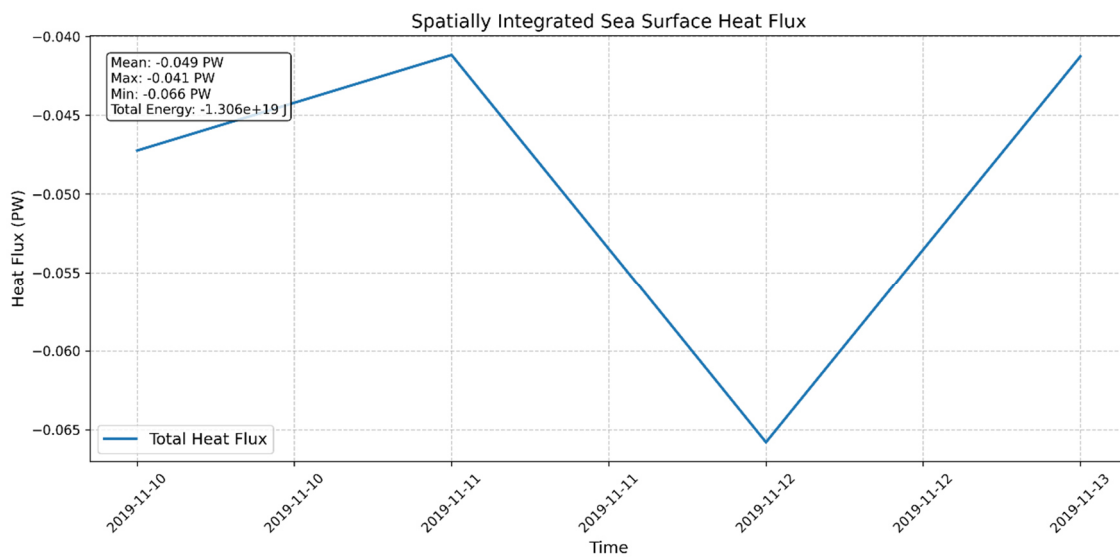

Fig. S3.13 – Spatially integrated Sea Surface Heat Flux assessed for the medicane Trudy.

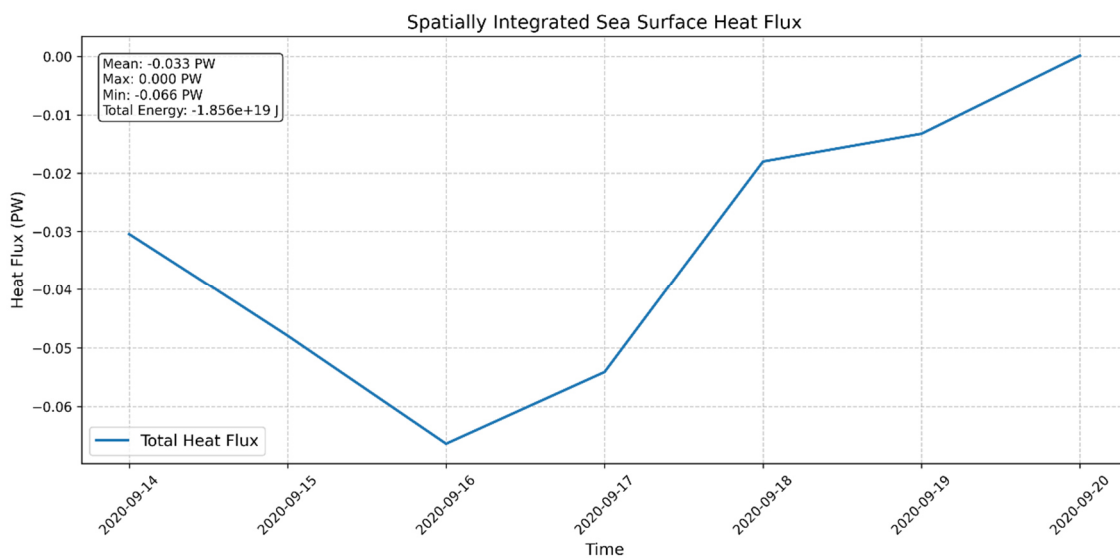

Fig. S3.14 – Spatially integrated Sea Surface Heat Flux assessed for the medicane Ianos.

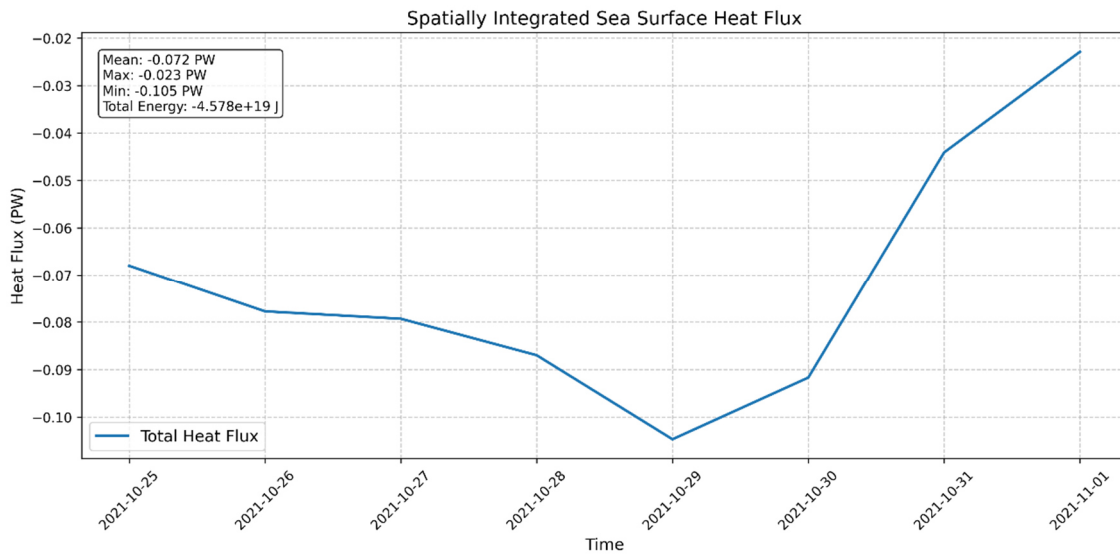

Fig. S3.15 – Spatially integrated Sea Surface Heat Flux assessed for the medicane Apollo.

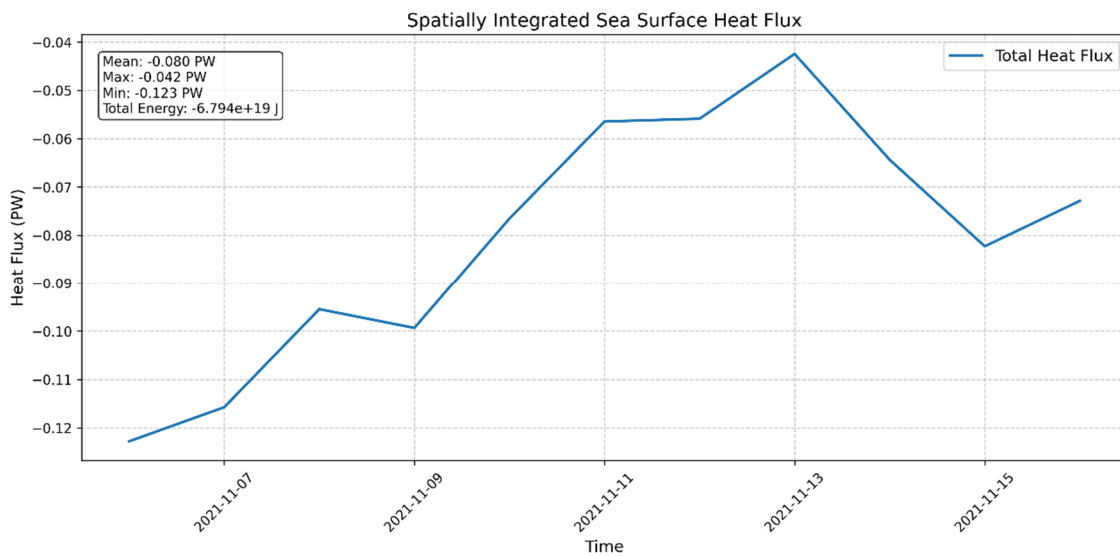

Fig. S3.16 – Spatially integrated Sea Surface Heat Flux assessed for the medicane Blas.



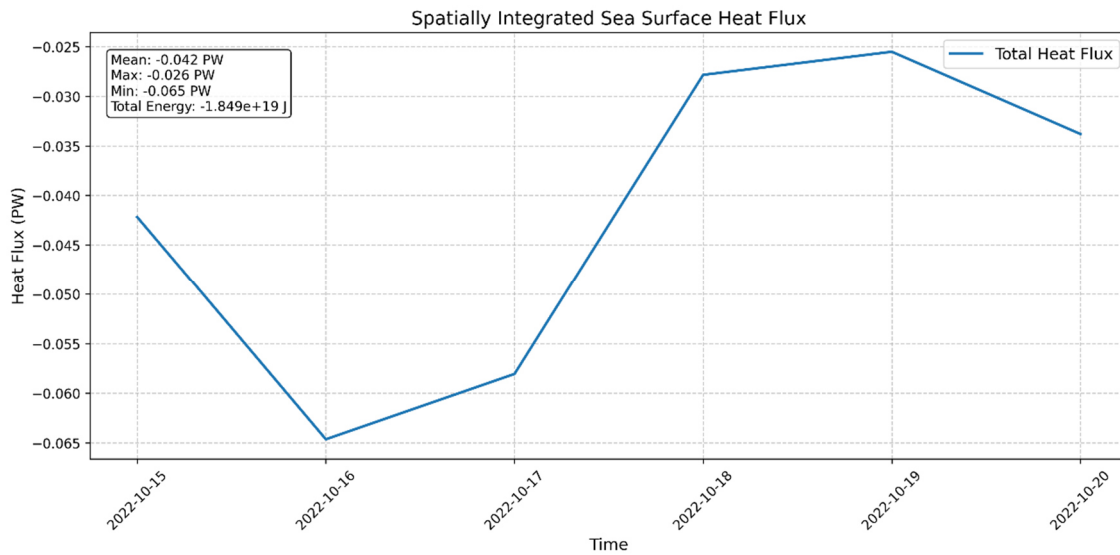

Fig. S3.17 – Spatially integrated Sea Surface Heat Flux assessed for the cyclone Ciprian.

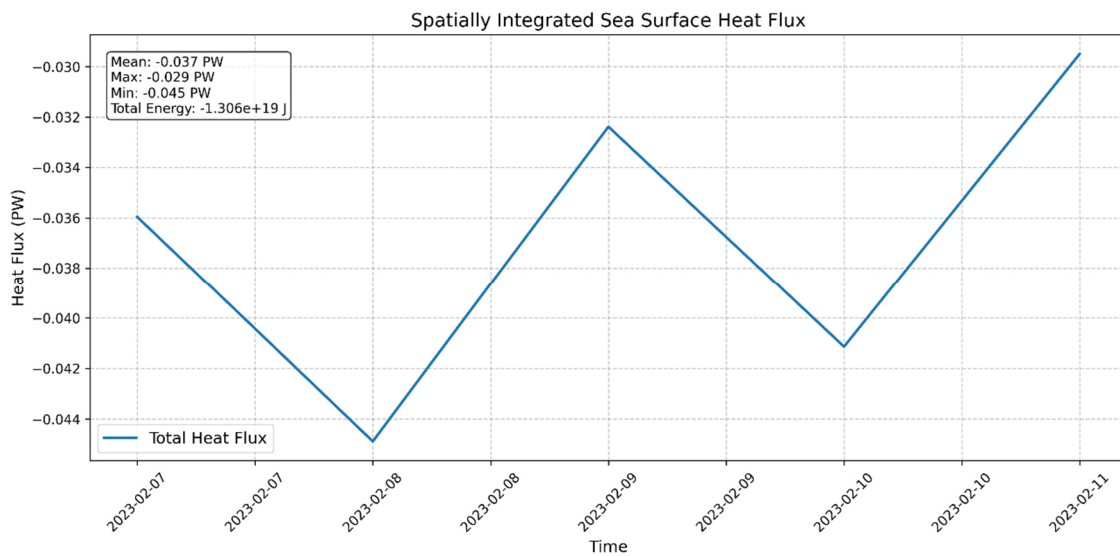

Fig. S3.18 – Spatially integrated Sea Surface Heat Flux assessed for the medicane Helios.

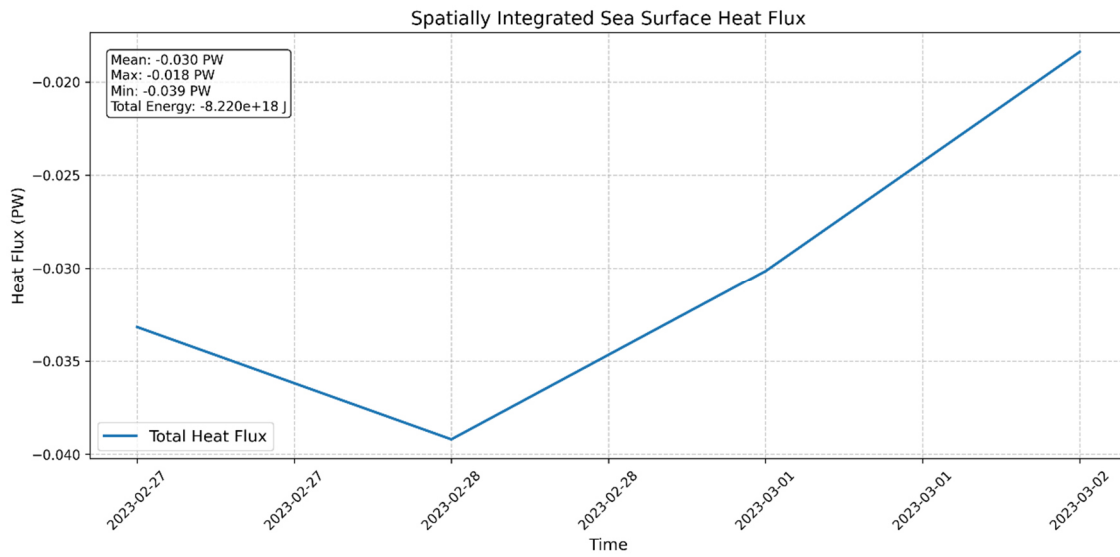

Fig. S3.19 – Spatially integrated Sea Surface Heat Flux assessed for cyclone Juliette.
